1 **Sugar transporters enable a leaf beetle to accumulate plant defense compounds**

2 Zhi-Ling Yang<sup>1</sup>, Hussam Hassan Nour-Eldin<sup>2</sup>, Sabine Hänniger<sup>3</sup>, Michael Reichelt<sup>4</sup>, Christoph

3 Crocoll<sup>2</sup>, Fabian Seitz<sup>1</sup>, Heiko Vogel<sup>3</sup> & Franziska Beran<sup>1\*</sup>

4

5 <sup>1</sup>Research Group Sequestration and Detoxification in Insects, Max Planck Institute for Chemical

6 Ecology, Jena, Germany.

7 <sup>2</sup>DynaMo Center, Department of Plant and Environmental Sciences, Faculty of Science,

8 University of Copenhagen, Frederiksberg, Denmark.

9 <sup>3</sup>Department of Entomology, Max Planck Institute for Chemical Ecology, Jena, Germany.

10 <sup>4</sup>Department of Biochemistry, Max Planck Institute for Chemical Ecology, Jena, Germany

11 Corresponding author: \*fberan@ice.mpg.de

## 12 **Abstract**

13 Many herbivorous insects selectively accumulate plant toxins for defense against predators;  
14 however, little is known about the transport processes that enable insects to absorb and store  
15 defense compounds in the body. Here, we investigate how a specialist herbivore, the horseradish  
16 flea beetle, accumulates high amounts of glucosinolate defense compounds in the hemolymph.  
17 Using phylogenetic analyses of coleopteran membrane transporters of the major facilitator  
18 superfamily, we identified a clade of glucosinolate-specific transporters (*PaGTRs*) belonging to  
19 the sugar porter family. *PaGTR* expression was predominantly detected in the excretory system,  
20 the Malpighian tubules. Silencing of *PaGTRs* led to elevated glucosinolate excretion, significantly  
21 reducing the levels of sequestered glucosinolates in beetles. This suggests that *PaGTRs* reabsorb  
22 glucosinolates from the Malpighian tubule lumen to prevent their loss by excretion. Ramsay assays  
23 performed with dissected Malpighian tubules confirmed a selective retention of glucosinolates.  
24 Thus, the selective accumulation of plant defense compounds in herbivorous insects can depend  
25 on the ability to prevent excretion.

## 26 **Introduction**

27       Physiological and chemosensory adaptations of herbivorous insects to plant defense  
28 compounds have played an important role in the evolution of insect-plant interactions and insect  
29 host range<sup>1-4</sup>. Among the most remarkable insect adaptations is the ability to selectively  
30 accumulate (sequester) plant defense compounds for protection from generalist predators<sup>5-7</sup>.  
31 Indeed, it is increasingly recognized that predator pressure has promoted insect adaptations to plant  
32 defenses and driven the evolution of specialized host plant associations<sup>7-10</sup>. Sequestration evolved  
33 in all major clades of herbivorous insects and is particularly wide-spread in the megadiverse  
34 phytophagous Coleoptera and Lepidoptera<sup>11</sup>; however, the mechanisms by which sequestering  
35 insects can accumulate ingested plant defense compounds in their body remain poorly understood.

36       Glucosinolates are hydrophilic defense compounds produced by plants of the order Brassicales  
37 that, together with the plant  $\beta$ -thioglucosidase enzyme myrosinase, constitute an activated two  
38 component defense system<sup>12-14</sup>. When tissue damage brings both components together,  
39 glucosinolates are rapidly hydrolyzed to unstable aglucones that give rise to different products<sup>15</sup>  
40 of which isothiocyanates are the most detrimental to small herbivores<sup>16-19</sup>. Some insects can  
41 prevent glucosinolate hydrolysis and accumulate ingested glucosinolates in the body<sup>20-25</sup>. A  
42 defensive function of glucosinolate sequestration has been demonstrated in specialist aphids and  
43 flea beetles, which convergently evolved insect myrosinases enabling glucosinolate activation in  
44 response to predator attack<sup>21,23,26</sup>. The turnip sawfly, *Athalia rosae*, sequesters glucosinolates but  
45 does not possess own myrosinase activity, making a role in defense less likely<sup>27,28</sup>. Instead, a rapid  
46 absorption of ingested glucosinolates across the gut epithelium could represent a detoxification  
47 mechanism as it spatially separates glucosinolates from the co-ingested plant myrosinase in the  
48 gut lumen<sup>28,29</sup>. Due to their physicochemical properties, transport of glucosinolates and other plant

49 glucosides such as cyanogenic and phenolic glucosides is proposed to be mediated by membrane  
50 carriers<sup>6,23,29</sup>. For example, Strauss and coworkers demonstrated the role of an ATP-binding  
51 cassette (ABC) transporter in the sequestration of the phenolic glucoside salicin in the defense  
52 glands of the poplar leaf beetle, *Chrysomela populi*<sup>30</sup>. More recently, Kowalski and coworkers  
53 identified an ABC transporter in the dogbane leaf beetle, *Chrysochus auratus*, with high activity  
54 towards a plant cardenolide, which adult beetles sequester in defense glands<sup>31</sup>. Apart from these  
55 examples, no other membrane transporters involved in sequestration have been identified to date.

56 We previously investigated the sequestration of glucosinolates in the flea beetle *Phyllotreta*  
57 *armoraciae*<sup>25,26</sup>. This species is monophagous on horseradish in nature, but feeds on various  
58 brassicaceous plants in the laboratory<sup>32-34</sup> and sequesters glucosinolates mainly in the  
59 hemolymph<sup>25</sup>. *P. armoraciae* prefer to sequester aliphatic glucosinolates over indolic  
60 glucosinolates; however, the sequestration pattern depends both on the levels and composition of  
61 glucosinolates in the food plant. Interestingly, the beetles also selectively excrete sequestered  
62 glucosinolates to balance the accumulation of new glucosinolates and maintain stable  
63 glucosinolate levels around 35 nmol per mg beetle fresh weight<sup>25</sup>. Based on these findings, we  
64 hypothesize that glucosinolate transporters are localized in gut and Malpighian tubule epithelial  
65 membranes in *P. armoraciae*.

66 Here we use a comparative phylogenetic approach to identify candidate glucosinolate  
67 transporter genes within the major facilitator superfamily. We focus on a *P. armoraciae*-specific  
68 clade comprising 21 putative sugar porters, which are predominantly expressed in the Malpighian  
69 tubules, and demonstrate glucosinolate-specific import activity for 13 transporters. We investigate  
70 the role of the identified glucosinolate transporters *in vivo* using RNA interference and establish  
71 the transport mechanism of one transporter selected as a model *in vitro*. Our results suggest that

72 transporter-mediated reabsorption of glucosinolates in the Malpighian tubules enables *P.*  
73 *armoraciae* to sequester high amounts of glucosinolates in the hemolymph.

## 74 **Results**

75 **Selection of candidate transporters.** To elucidate the molecular basis of glucosinolate transport  
76 in *P. armoraciae*, we generated a gut- and Malpighian tubule-specific transcriptome. In this  
77 transcriptome, we predicted a total of 1401 putative membrane transporters using the transporter  
78 automatic annotation pipeline (TransAAP)<sup>35</sup>. Of these, 353 are putative members of the major  
79 facilitator superfamily (MFS; Transporter Classification (TC)# 2.A.1; Supplementary Table 1),  
80 which are known to transport a broad spectrum of substrates including sugars and amino acids  
81 across membranes<sup>36,37</sup>.

82 We selected MFS transporters as our candidates and additionally assumed that gene  
83 duplications have played a role in the evolution of glucosinolate transport activity in *P. armoraciae*.  
84 To detect species-specific expansions of MFS transporters, we annotated MFS transporters in the  
85 publicly available genomes of three non-sequestering beetle species (Supplementary Data 1). By  
86 phylogenetic analysis, we identified the largest *P. armoraciae*-specific clade comprising 21  
87 putative sugar porters (TC# 2.A.1.1) for further study (Supplementary Data 2). Members of this  
88 clade share between 31 and 93% amino acid sequence identity and are most similar to insect  
89 trehalose transporters.

90 **Functional characterization of candidate transporters.** We expressed the candidate transporters  
91 in High Five insect cells and screened them for glucoside import activity. In addition to  
92 glucosinolates, we tested different types of non-host glucosides as substrates, namely iridoid,  
93 cyanogenic, and phenolic glucosides (Fig. 1a). Insect cells expressing 15 different transporters

94 accumulated significantly higher levels of at least one tested glucoside compared to control cells.  
95 Of these, 13 transporters were specific for glucosinolates (Fig. 1b, c), hereafter referred to as  
96 *Phyllotreta armoraciae* Glucosinolate Transporter (*PaGTR*) 1 to 13. Most *PaGTRs* showed broad  
97 and overlapping substrate spectra; for example, 10 different *PaGTRs* used 2-propenyl  
98 glucosinolate, the major glucosinolate in the host plant of *P. armoraciae*, as a substrate. The other  
99 two transporters mediated iridoid glucoside uptake into insect cells, whereas phenolic and  
100 cyanogenic glucosides were not used as substrates by any of the recombinant transporters (Fig. 1c  
101 and Supplementary Fig. 1).

102 **Tissue-specific expression of *PaGTRs*.** To determine the localization of *PaGTRs* in *P.*  
103 *armoraciae*, we compared the transcript levels in foregut, midgut, hindgut, Malpighian tubules,  
104 and other tissues by quantitative PCR. All except two *PaGTRs* were specifically expressed in the  
105 Malpighian tubules (Fig. 1d and Supplementary Fig. 2). Along the tubule, *PaGTRs* were  
106 predominantly expressed in the proximal region close to the midgut-hindgut junction (Fig. 1e and  
107 Supplementary Fig. 2d). This Malpighian tubule region was previously shown to reabsorb  
108 metabolites to prevent their loss by excretion<sup>38-40</sup>.

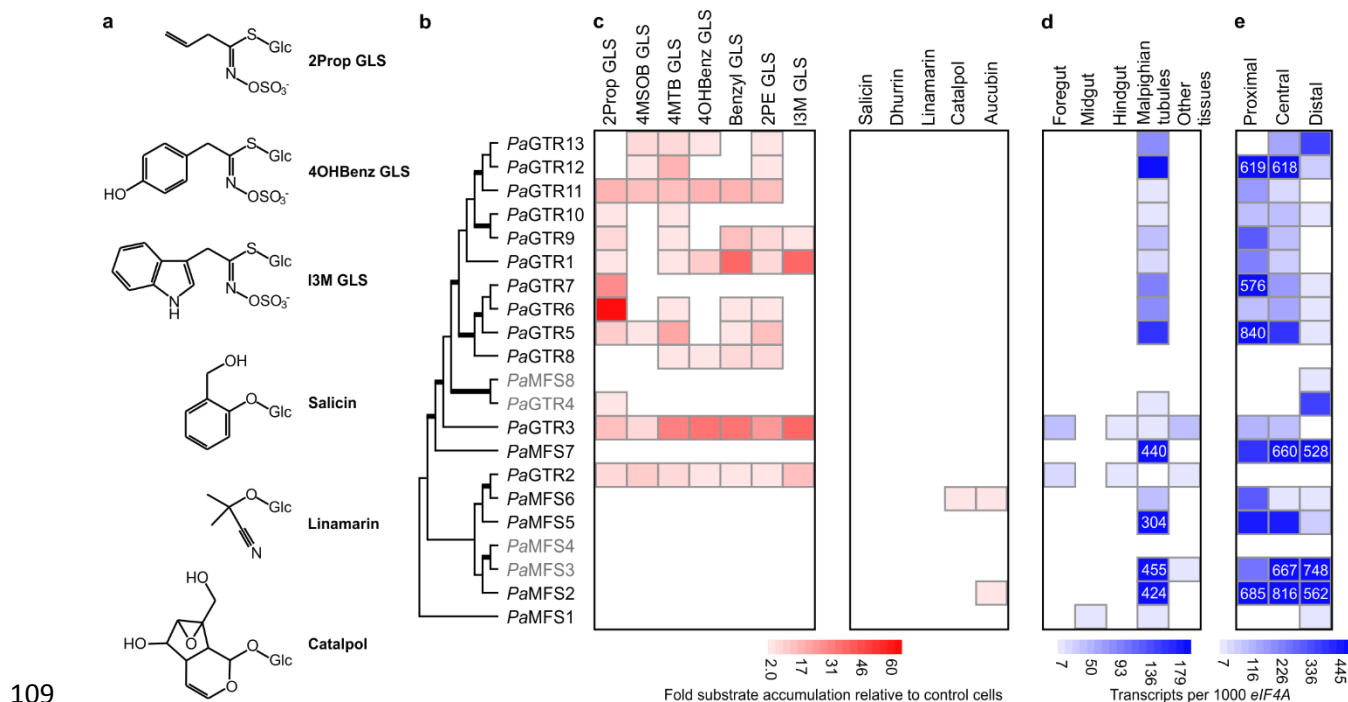

109

110 **Fig. 1 Import activity and expression pattern of candidate MFS transporters.** **a** Chemical structures of  
 111 selected glucosinolates (GLS) and non-host glucosides used in transport activity assays. **b** Phylogenetic  
 112 relationships of candidate transporters selected based on the diversification pattern of coleopteran MFS  
 113 transporters shown in Supplementary Data 2. Branches shown in bold have a bootstrap support higher than  
 114 95%. Recombinant proteins expressed in High Five insect cells were detected by Western blotting. For four  
 115 candidates, we did not detect recombinant protein (Supplementary Fig. 1); the names of these candidates  
 116 are written in grey **c** Recombinant transporters were screened for glucoside uptake activity in assays using  
 117 equimolar mixtures of glucosinolates or non-host glucosides. Glucoside accumulation in transfected insect  
 118 cells is expressed relative to that in mock-transfected insect cells used as background control. Values  
 119 represent the mean of three assays. **d** Expression pattern of candidate MFS transporter genes in different  
 120 tissues of *P. armoraciae*. **e** Expression pattern of candidate MFS transporter genes in different regions of  
 121 the Malpighian tubule. Copy number estimates are given per 1000 copies of mRNA of the reference gene  
 122 *eIF4A*. Low gene expression levels are visualized by limiting the scale to a value of 200 and 500 in **d** and  
 123 **e**, respectively. The exact values are provided for genes with higher expression level. Each value represents  
 124 the mean of four and three biological replicates in **d** and **e**, respectively. 2Prop, 2-propenyl; 4MSOB, 4-  
 125 methylsulfinylbutyl; 4MTB, 4-methylthiobutyl; 4OHBenz, 4-hydroxybenzyl; 2PE, 2-phenylethyl; I3M,  
 126 indol-3-ylmethyl.

127 **Function of *PaGTRs in vivo*.** The Malpighian tubules are bathed in hemolymph, the major storage  
128 site for sequestered glucosinolates in *P. armoraciae*. We analyzed the glucosinolate levels in the  
129 hemolymph and detected total concentrations of up to 106 mM (Supplementary Table 2). Which  
130 role does *PaGTR*-mediated glucosinolate transport in Malpighian tubules play in glucosinolate  
131 storage? We addressed this question by silencing *PaGTR* expression in adult *P. armoraciae* beetles.  
132 We selected *PaGTR1* as a model because this transporter prefers indol-3-ylmethyl (I3M)  
133 glucosinolate, a substrate that is transported by only one other Malpighian tubule-specific  
134 transporter (Fig. 1c). After confirming the specific silencing of *PaGTR1* expression by quantitative  
135 PCR (Fig. 2a; Supplementary Fig. 3a), we fed the beetles with leaves of *Arabidopsis thaliana* Col-  
136 0 (*Arabidopsis*) containing I3M glucosinolate.

137 Although the treatment did not influence beetle feeding behavior (Supplementary Fig. 3b), we  
138 detected significantly less I3M glucosinolate and 1-methoxyindol-3-ylmethyl (1MOI3M)  
139 glucosinolate in *PaGTR1*-silenced beetles than in control beetles (Fig. 2b). In addition, *PaGTR1*-  
140 silencing led to elevated levels of I3M and 1MOI3M glucosinolates in the feces (Fig. 2c). The  
141 levels of other glucosinolates were not reduced in *PaGTR1*-silenced beetles compared to the  
142 control (Supplementary Table 3 and Supplementary Fig. 4). The effect of *PaGTR1* knock-down  
143 on the accumulation and excretion of specific glucosinolates in *P. armoraciae* is consistent with  
144 the substrate preference of recombinant *PaGTR1* in insect cell-based uptake assays, and suggests  
145 that *PaGTR1* prevents excretion of two indolic glucosinolates by reabsorbing them from the  
146 Malpighian tubule lumen.

147 ***PaGTR1* is a proton-dependent high affinity glucosinolate transporter.** To establish the  
148 mechanism of *PaGTR1*-mediated glucosinolate reabsorption, we expressed *PaGTR1* in *Xenopus*  
149 *laevis* oocytes and analyzed its biochemical properties. First, we analyzed the substrate preference



150 of oocyte-expressed *PaGTR1*, and found it to be similar to that of insect cell-expressed *PaGTR1*  
151 (Fig. 2d). Previously characterized members of the sugar porter family act either as uniporters or  
152 as proton-dependent active transporters<sup>41-43</sup>; thus, we analyzed whether the extracellular pH  
153 influences I3M glucosinolate accumulation in *PaGTR1*-expressing oocytes. The glucosinolate  
154 uptake rate depended on the external pH and was maximal at pH 6, which is consistent with the  
155 acidic pH in the Malpighian tubule lumen of *P. armoraciae* (Fig. 2e and Supplementary Fig. 5).  
156 Uptake activity decreased significantly when pH was greater than 6, suggesting that *PaGTR1*-  
157 mediated glucosinolate transport is driven by a proton gradient across the membrane. To test this,  
158 we performed glucosinolate uptake assays at pH 6 and added either the protonophore carbonyl  
159 cyanide *m*-chlorophenyl hydrazine (CCCP), the K<sup>+</sup>/H<sup>+</sup> exchanger nigericin, or the K<sup>+</sup> ionophore  
160 valinomycin to the assay medium. Addition of CCCP and nigericin decreased the glucosinolate  
161 uptake rates by 77% and 50% compared to control assays, respectively, whereas valinomycin did  
162 not influence transport by *PaGTR1*-expressing oocytes. The effects of different ionophores on  
163 glucosinolate transport show that *PaGTR1*-mediated glucosinolate uptake is proton-driven, but is  
164 not influenced by K<sup>+</sup> (Fig. 2f).

165 A time-course analysis of I3M glucosinolate accumulation in *PaGTR1*-expressing oocytes  
166 revealed that glucosinolate levels saturated after three hours at an intracellular concentration that  
167 was twofold higher than in the assay buffer. This result confirmed that *PaGTR1* can mediate  
168 glucosinolate uptake against a concentration gradient (Fig. 2g). Plotting the transport rate as a  
169 function of increasing glucosinolate concentration yielded a saturation curve that was fitted to  
170 Michaelis-Menten kinetics with a  $K_m$  value of  $50.6 \pm 4.1 \mu\text{M}$  (Fig. 2h). Considering the much  
171 higher I3M glucosinolate concentration of  $2082 \pm 668 \mu\text{M}$  in the hemolymph (Supplementary

172 Table 2), our results characterize *PaGTR1* as a high affinity proton-dependent glucosinolate  
 173 transporter in *P. armoraciae*.

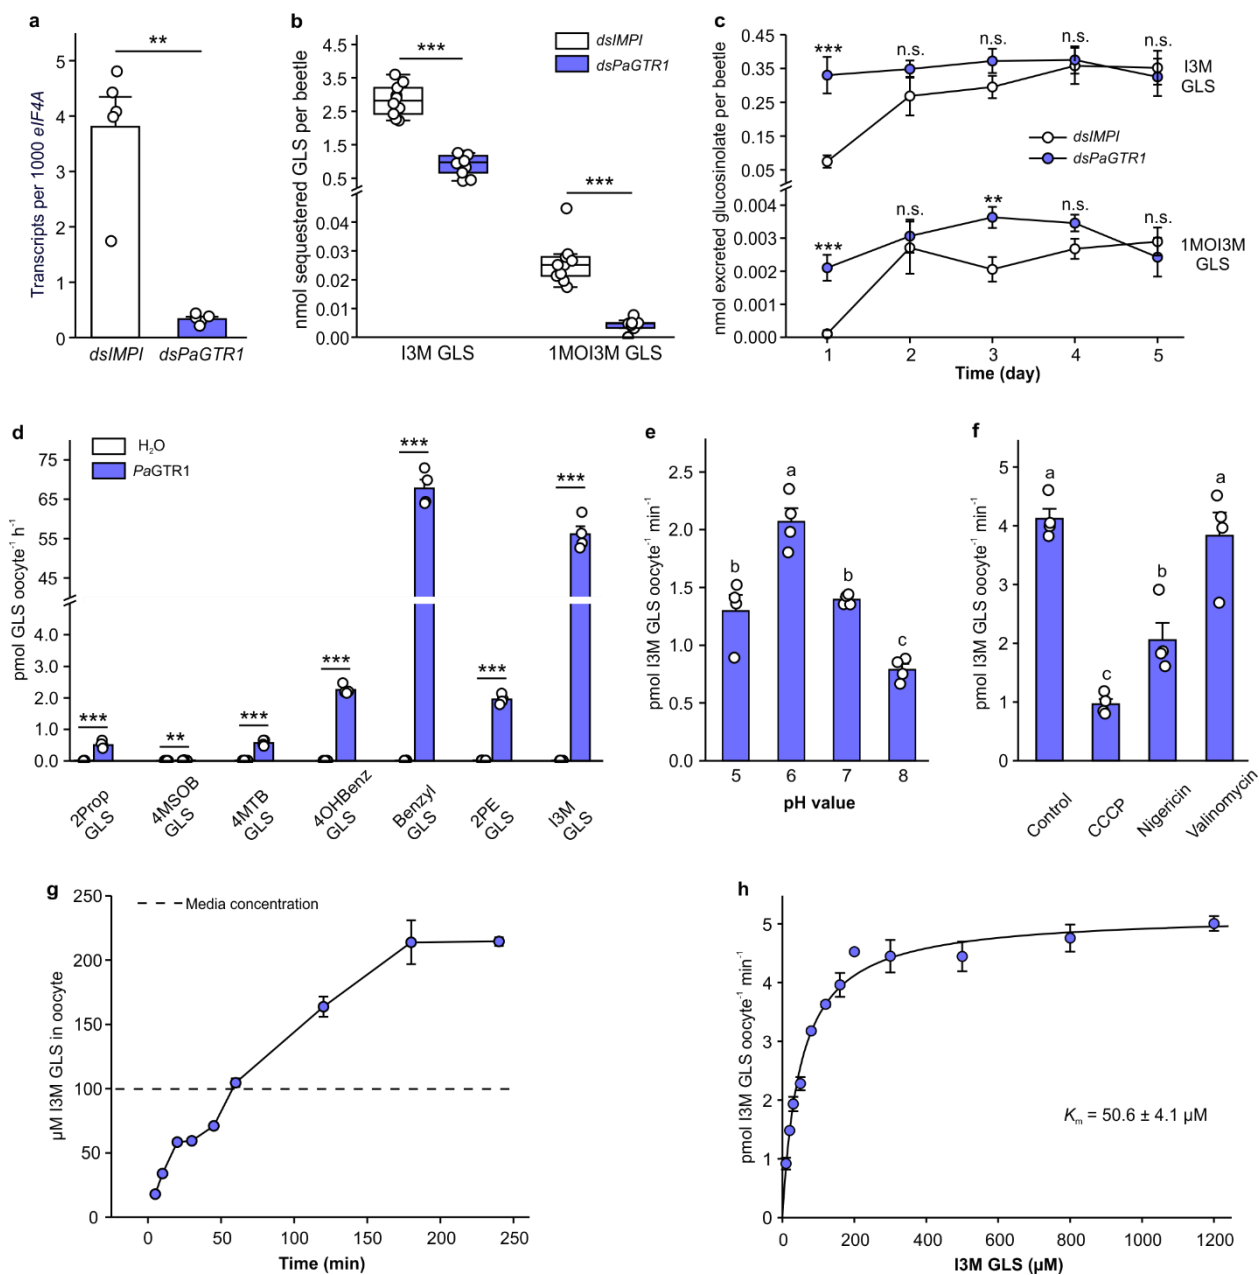

174

175 **Fig. 2 Functional and biochemical characterization of *PaGTR1*-mediated glucosinolate transport. a**  
 176 *PaGTR1* expression in *P. armoraciae* four days after dsRNA injection ( $n = 5$ ). **b** Accumulation of indol-3-  
 177 ylmethyl (I3M) GLS and 1-methoxyindol-3-ylmethyl (1MOI3M) GLS in adult *P. armoraciae* beetles after  
 178 five days feeding on *Arabidopsis* leaves. Box plots show the median, interquartile range, and outliers of

179 each data set ( $n = 10$ ). **c** Excreted amounts of I3M GLS and 1MOI3M GLS over five days feeding on  
180 *Arabidopsis* ( $n = 9$  for day 4,  $n = 10$  for other days). **d** Substrate preference of *PaGTR1*. Oocytes expressing  
181 *PaGTR1* and control oocytes were incubated with equimolar mixtures of seven glucosinolates ( $n = 4$ ). **e**  
182 pH dependency of *PaGTR1* ( $n = 4$ ). **f** Effects of different ionophores on *PaGTR1*-mediated glucosinolate  
183 transport ( $n = 4$ ). **g** Time course of glucosinolate accumulation in *Xenopus* oocytes expressing *PaGTR1* ( $n$   
184  $= 4$ ). **h** Kinetic analysis of *PaGTR1*-mediated I3M GLS transport ( $n = 4$ ). Data are shown as mean  $\pm$  s.e.m.  
185 Treatments were compared by two-tailed Student's *t*-test, Mann-Whitney *U* test or the method of  
186 generalized least squares (**a**, **b**, **c**, **d**), or one-way analysis of variance (ANOVA) (**e**, **f**). Bars labeled with  
187 different letters are significantly different ( $P < 0.05$ ). n.s., not significantly different, \*\*  $P < 0.01$ , \*\*\*  $P <$   
188 0.001.

189 ***P. armoraciae* selectively retain glucosinolates.** We further investigated the role of selective  
190 transport in Malpighian tubules by analyzing the excretion of two glucosinolates (2-propenyl- and  
191 4-hydroxybenzyl glucosinolate) and three non-host glucosides (salicin, linamarin and catalpol)  
192 after injection into the hemolymph of adult *P. armoraciae* beetles. Within one day, beetles excreted  
193 between 18% and 58% of the injected non-host glucosides and less than 2% of the injected  
194 glucosinolates (Fig. 3a). In addition, we compared the recovery of injected glucosides after 30  
195 mins with that after one day. While the levels of glucosinolates remained stable, we recovered  
196 significantly less non-host glucosides from beetle bodies. However, significantly more catalpol  
197 than salicin and linamarin was recovered (Fig. 3a), suggesting that catalpol was excreted or  
198 metabolized at a lower rate than the other two non-host glucosides.

199 To confirm that the selective retention of glucosinolates in *P. armoraciae* is due to reabsorption,  
200 we analyzed glucoside excretion *in situ* using Ramsay assays (Supplementary Fig. 6). We exposed  
201 dissected Malpighian tubules to an equimolar mixture of glucosides and compared the glucoside  
202 composition in the bathing saline and Malpighian tubule tissue, and in the Malpighian tubule tissue  
203 and the excretion fluid, respectively. The Malpighian tubule tissue contained significantly lower  
204 proportions of glucosinolates than the bathing saline and correspondingly higher proportions of

205 non-host glucosides (Fig. 3b). The excretion fluid contained even lower percentages of most  
206 glucosinolates, in particular of 2-propenyl and 2-phenylethyl glucosinolates. In addition, we  
207 detected less catalpol in the excretion fluid than in the Malpighian tubule tissue. Combined, these  
208 findings show that the Malpighian tubules of *P. armoraciae* selectively reabsorb glucosinolates  
209 and catalpol, which is consistent with the substrate spectra of recombinant candidate transporters  
210 (Fig. 1c).

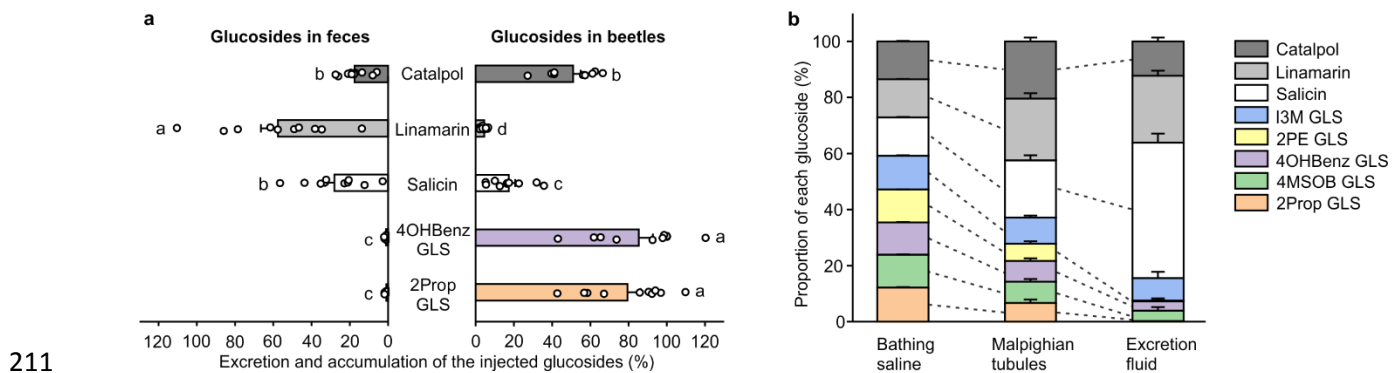

211  
212 **Fig. 3 Selective excretion of plant glucosides *in vivo* and *in situ*.** **a** Excretion and accumulation of plant  
213 glucosides injected in beetles. Each beetle was injected with 100 nL of an equimolar mixture of five  
214 glucosides. Injected beetles were sampled 30 min after the injection and after one day feeding on  
215 *Arabidopsis* ( $n = 10$ ). Glucoside excretion was analyzed by quantifying the amount of excreted glucosides  
216 in the feces ( $n = 10$ ). Glucoside content in beetles and feces is expressed relative to the glucoside amounts  
217 detected in beetles 30 min after injection (set to 100%). The relative accumulation and excretion of  
218 glucosides was compared using the method of generalized least squares, respectively. Bars labeled with  
219 different letters are significantly different ( $P < 0.05$ ). **b** Excretion of plant glucosides by isolated Malpighian  
220 tubules. The dissected Malpighian tubule was placed in a droplet of saline and a mixture of eight different  
221 plant glucosides each at a concentration of 6.7 mM. To visualize excretion, we added 0.1% (w/v) amaranth.  
222 After 2-3 h, bathing saline, Malpighian tubule and excretion fluid were sampled, extracted and analyzed by  
223 LC-MS/MS. Paired  $t$ -tests were used to compare the relative composition of plant glucosides in bathing  
224 saline and Malpighian tubule, and Malpighian tubule and excretion fluid, respectively. Dashed lines  
225 indicate significant differences between samples ( $P < 0.05$ ,  $n = 11$ ). Data are shown as mean  $\pm$  s.e.m.

226 ***PaGTRs* prevent excretion of 2-propenyl glucosinolate.** 2-Propenyl glucosinolate represents the  
227 major glucosinolate in the host plant of *P. armoraciae* and is sequestered at very high levels in the  
228 beetle hemolymph (Supplementary Table 2). To determine whether the identified *PaGTRs* also  
229 capable of reabsorbing 2-propenyl glucosinolate in *P. armoraciae*, we simultaneously silenced the  
230 expression of a clade comprising four Malpighian tubule-specific transporters (*PaGTR5/6/7/8*),  
231 among which three used 2-propenyl glucosinolate as a substrate *in vitro* (Fig. 1b, c). Beetles with  
232 silenced *PaGTR5/6/7/8* expression excreted significantly more 2-propenyl glucosinolate than  
233 control beetles (Fig. 4a, c and Supplementary Fig. 7, 8). In addition, 2-propenyl glucosinolate  
234 levels were significantly lower in *PaGTR5/6/7/8*-silenced beetles than in control beetles (Fig. 4b  
235 and Supplementary Table 4). These results support our hypothesis that the major function of  
236 Malpighian tubule-expressed *PaGTRs* is reabsorption.

237 **Silencing of *PaGTR2* and *PaGTR3* does not affect glucosinolate accumulation from**  
238 ***Arabidopsis*.** Two transporter genes, *PaGTR2* and *PaGTR3*, were found to be expressed in the  
239 foregut, hindgut, and other tissues. Because of their expression in the foregut, we investigated  
240 whether *PaGTR2* and *PaGTR3*, which showed a broad substrate specificity *in vitro*, play a role in  
241 glucosinolate absorption from the gut lumen. However, silencing of *PaGTR2* and *PaGTR3*  
242 expression did not influence the accumulation of ingested glucosinolates in beetles in feeding  
243 assays with *Arabidopsis* (Supplementary Fig. 9).

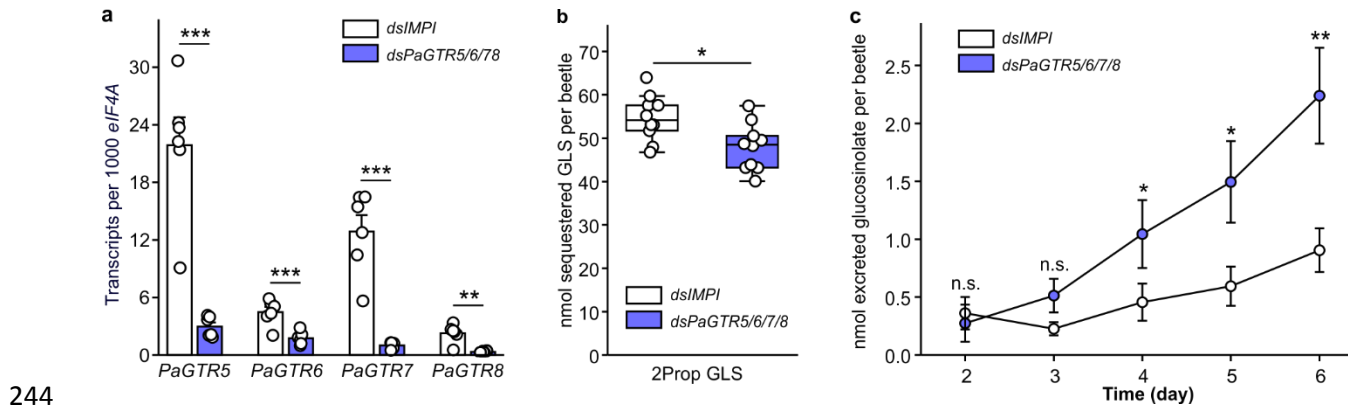

244

245 **Fig. 4 In vivo functional characterization of glucosinolate transport mediated by *PaGTR5/6/7/8*.** **a**  
246 *PaGTR5/6/7/8* expression in *P. armoraciae* six days after dsRNA injection ( $n = 6$ ). **b** Accumulation of 2-  
247 propenyl glucosinolate (2Prop GLS) in adult *P. armoraciae* beetles after six days feeding on *Arabidopsis*  
248 leaves followed by one day starvation. Box plots show the median, interquartile range, and outliers of each  
249 data set ( $n = 10$ ). **c** Excreted amounts of 2Prop GLS from day 2 until day 6 of feeding on *Arabidopsis* ( $n =$   
250 10). n.s., not significantly different; \* $P < 0.05$ , \*\* $P < 0.01$ , \*\*\* $P < 0.001$ . Data are shown as mean  $\pm$  s.e.m.

## 251 Discussion

252 In this study, we identified glucosinolate-specific transporters in *P. armoraciae* that play an  
253 important role in sequestration. We show that *PaGTRs* are mainly expressed in the Malpighian  
254 tubules and mediate glucosinolate import *in vitro*. Silencing *PaGTR* expression in Malpighian  
255 tubules led to increased glucosinolate excretion, which indicates that *PaGTRs* reabsorb  
256 glucosinolates from the Malpighian tubule lumen into the epithelial cells. These findings  
257 demonstrate that active reabsorption in the Malpighian tubules is required for glucosinolate  
258 accumulation in the hemolymph of *P. armoraciae*.

259 Glucosinolate transporters have previously been identified in the model plant *Arabidopsis* by  
260 screening 239 transport proteins for glucosinolate uptake activity in *Xenopus oocytes*<sup>44</sup>. Plant  
261 GTRs belong to the nitrate/peptide family (NPF) and presumably evolved from ancestral  
262 cyanogenic glucoside transporters<sup>45</sup>. The corresponding transporter family in *P. armoraciae*,

263 annotated as proton-dependent oligopeptide transporter family (POT), comprised only six putative  
264 transporters (Supplementary Table 1) and was not investigated in our study. Instead, our  
265 phylogenetic analysis of coleopteran MFS transporters provided evidence for species-specific  
266 expansions in particular within the sugar porter family, which led us to focus on the largest *P.*  
267 *armoraciae*-specific clade of putative sugar porters. All *Pa*GTRs except for *Pa*GTR2 clustered  
268 together in one well-supported group (Fig. 1b). Separate of this group we additionally identified  
269 two iridoid glycoside-specific transporters. Our study thus highlights the potential of sugar porters  
270 to evolve activity towards glycosylated defense compounds.

271 The presence of iridoid glycoside-specific transporters in *P. armoraciae* was surprising, as  
272 plants of the order Brassicales do not produce iridoid glycosides<sup>46,47</sup>. Consistently, we observed  
273 reabsorption of the iridoid glycoside catalpol in Malpighian tubules (Fig. 3). Several flea beetles  
274 of the genus *Longitarsus* selectively sequester aucubin and catalpol<sup>48</sup>, but this genus is likely not  
275 closely related to *Phyllotreta*<sup>49</sup>. Nevertheless, it is possible that iridoid glycoside-specific  
276 transporters that had evolved in an ancestor of *Phyllotreta* have retained their function even after  
277 flea beetles have adapted to plant families with distinct defense compounds.

278 An evolutionary link between the sequestration of iridoid glucosides and glucosinolates has  
279 previously been discovered in the sawfly genus *Athalia* in which a host shift occurred from iridoid  
280 glycoside-containing Lamiales to glucosinolate-containing Brassicaceae<sup>50</sup>. Sequestration  
281 experiments demonstrated that Brassicaceae-feeders were able to sequester both iridoid glycosides  
282 and glucosinolates, whereas Lamiales-feeders only sequestered iridoid glycosides. Based on these  
283 findings, Opitz and coworkers hypothesized that glycoside transporters evolved a broader substrate  
284 specificity in Brassicaceae feeders. It is also imaginable that the presence of iridoid glycoside-  
285 specific transporters in the ancestor of *Phyllotreta* has facilitated the evolution of glucosinolate

286 transport activity when flea beetles specialized on brassicaceous plants. To better understand the  
287 evolutionary origin of *PaGTRs*, it will be interesting to investigate the evolution and function of  
288 sugar porters across different flea beetle genera.

289 The specific expression of most *PaGTRs* in the Malpighian tubules indicated an important role  
290 of the beetle's excretory system in sequestration. In fact, pioneering work by Meredith and  
291 coworkers published in 1984 demonstrated that the Malpighian tubules of the large milkweed bug,  
292 *Oncopeltus fasciatus*, actively reabsorb the polar cardiac glycoside ouabain, which is sequestered  
293 predominantly in the integument, after its passive secretion into the Malpighian tubule lumen<sup>38</sup>.  
294 Although it has generally been recognized that sequestering insects require mechanisms to prevent  
295 the excretion of polar metabolites from the hemolymph<sup>51</sup>, these mechanisms have not been further  
296 investigated. Our physiological assays demonstrate that the Malpighian tubule epithelium of *P.*  
297 *armoraciae* discriminates among different types of glucosinolates and non-host glucosides and can  
298 reabsorb in particular glucosinolates against a concentration gradient (Fig. 3). Since *PaGTRs*  
299 mediated glucosinolate import *in vitro*, we propose that they are located at the apical membrane  
300 and thereby enable glucosinolate uptake from the lumen. To complete transepithelial glucosinolate  
301 transport, a so far unknown membrane transporter localized at the basolateral membrane is  
302 required to export glucosinolates into the hemolymph (Fig. 5).



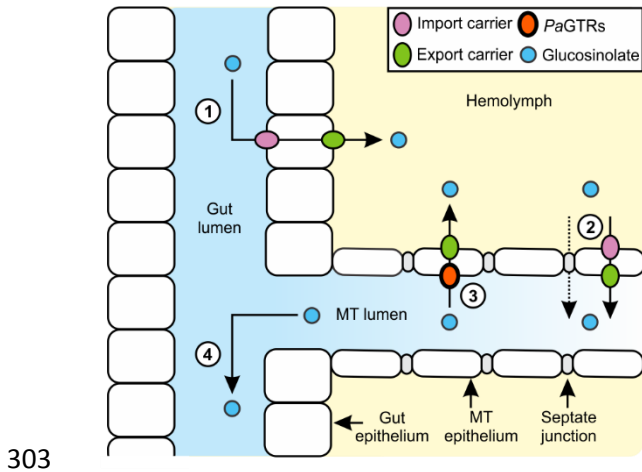

303

304 **Fig. 5 Proposed model of glucosinolate sequestration in adult *P. armoraciae*.** (1) Absorption of ingested  
305 glucosinolates from the gut lumen into the hemolymph; (2) Transcellular or paracellular glucosinolate  
306 transport from the hemolymph into the Malpighian tubule (MT) lumen; (3) Selective reabsorption of  
307 glucosinolates from the MT lumen into the hemolymph; (4) Excretion of excess glucosinolates. *PaGTRs*  
308 localized in the MT are proposed to import glucosinolates from the lumen across the apical membrane into  
309 the epithelial cells.

310 The expression profile of putative sugar porter genes in *P. armoraciae* (Supplementary Data 1)  
311 and a recent proteomic study performed with the poplar leaf beetle *C. populi*<sup>52</sup> showed that many  
312 sugar porters are specifically expressed in the Malpighian tubules. To our knowledge, only one  
313 Malpighian tubule-specific sugar porter has been characterized to date - sugar transporter 8 from  
314 the brown plant hopper, *Nilaparvata lugens*, which reabsorbs trehalose<sup>42</sup>. Thus, there is first  
315 evidence that sugar porters localized in Malpighian tubules play a role in reabsorption. The  
316 localization and function of putative sugar porters we have identified in published beetle genomes  
317 has not yet been investigated; however, a phylogenetic analysis suggests that the Malpighian  
318 tubule-specific sugar porter CpSP-like17 from *C. populi* and *PaGTRs* evolved from a common  
319 ancestor (Supplementary Fig. 10). We thus propose that *PaGTRs* evolved by duplications of a  
320 Malpighian tubule-localized sugar porter. Investigating the localization of flea beetle sugar porters

321 that are phylogenetically closely related to *PaGTRs* will help to establish whether *PaGTRs* indeed  
322 evolved from Malpighian tubule-specific sugar porters.

323 The distinct expression pattern of *PaGTR2* and *PaGTR3* (Fig. 1d) suggested that *PaGTRs* are  
324 not only involved in reabsorption in the Malpighian tubules. Here, the expression in the foregut  
325 suggested for example a role in glucosinolate absorption. Although the insect midgut has been  
326 proposed to be the major tissue involved in absorption<sup>40</sup>, there is initial evidence that glucosinolate  
327 absorption might already occur in the foregut of *A. rosae* larvae<sup>29</sup>. However, as silencing *PaGTR2*  
328 and *PaGTR3* expression had no effect on the accumulation of ingested glucosinolates in beetles,  
329 it is likely that additional or other membrane transporters are required. To establish the mechanism  
330 of glucosinolate absorption, we currently investigate the localization and specificity of  
331 glucosinolate uptake in adult *P. armoraciae*.

332 Transport processes play a central role in the evolution of insect sequestration mechanisms. Our  
333 study highlights that sequestering insects require mechanisms that prevent the excretion of target  
334 compounds, for example by active reabsorption. We furthermore show that in *P. armoraciae*,  
335 reabsorption is selective and thus can control not only the level but also the composition of  
336 sequestered metabolites in the beetle. Understanding the molecular basis of sequestration now  
337 opens up the possibility to manipulate the accumulation of defense compounds in insects in order  
338 to investigate how sequestration influences trophic interactions and shapes the composition of  
339 ecological communities.

## 340 **Methods**

341 **Insect culture.** *P. armoraciae* beetles were reared on potted *Brassica juncea* cultivar “Bau Sin” plants or  
342 on potted *Brassica rapa* cultivar “Yo Tsai Sum” plants (Known-You Seed Co. Ltd.) in mesh cages  
343 (Bugdorm, MegaView Science Co., Ltd.) in a controlled environment chamber at 24 °C, 60% relative  
344 humidity and a 16-h photoperiod. Food plants were cultivated in a growth chamber at 24 °C, 55% relative  
345 humidity, and a 14-h photoperiod. Beetles were provided with three- to four-week old plants once per week,  
346 and plants with eggs were kept separately for larval development. Larvae were allowed to pupate in the soil  
347 and after three weeks, the soil with pupae was transferred into plastic boxes (9 L, Lock&Lock) until the  
348 new generation of beetles emerged.

349 **RNA isolation, RNAseq and *de novo* transcriptome assembly.** Total RNA was extracted from dissected  
350 foregut, midgut, hindgut, and Malpighian tubule tissue of newly emerged *P. armoraciae* beetles that were  
351 reared on *B. juncea* using the innuPREP RNA Mini Kit (Analytik Jena). Tissues from at least 10 beetles  
352 were pooled per sample. RNA integrity was verified using an Agilent Technologies 2100 Bioanalyzer with  
353 the RNA 6000 Nano Kit (Agilent Technologies). RNA quantity was determined using a Nanodrop ND-  
354 1000 spectrophotometer (PEQlab Biotechnologie GmbH). One set of RNA samples was sequenced by  
355 GATC Biotech on the HiSeq 2500 System from Illumina in Rapid Run mode, using the paired-end (2 ×  
356 125 bp) read technology at a depth of 15-25 million reads for each sample. For a second set of samples  
357 consisting of four biological replicates per tissue, we additionally performed an on-column DNA digestion  
358 with the innuPREP DNase I Digest Kit (Analytik Jena) according to the manufacturer’s instructions. RNA  
359 samples were poly(A)-enriched, fragmented, and sequenced at the Max Planck Genome Centre Cologne on  
360 the HiSeq 3000 Sequencing System from Illumina, using the paired-end (2 × 150 bp) read technology at a  
361 depth of 22 million reads for each sample. Sequencing reads were filtered to remove bad-quality reads  
362 based on fastq file scores and trimmed based on read length using CLC Genomics Workbench software  
363 version 10.1. With a randomly sampled set of 420 million reads from the two sets of sequencing data, a  
364 transcriptome was assembled *de novo* with the following parameters: nucleotide mismatch cost = 1;

365 insertion = deletion costs = 2; length fraction = 0.6; similarity = 0.9. Conflicts among the individual bases  
366 were resolved by voting for the base with the highest frequency. After removing contigs shorter than 250  
367 bp, the final assembly contained 36,445 contigs with an N50 contig size of 2,115 bp.

368 **Identification of coleopteran MFS transporters.** We predicted a protein dataset for *P. armoraciae* by  
369 translating each contig of the gut and Malpighian tubule-specific transcriptome into all six reading frames.  
370 After removing sequences shorter than 50 amino acids, we submitted the protein dataset (267,568  
371 sequences) to the Transporter Automatic Annotation Pipeline (TransAAP) hosted at the TransportDB 2.0  
372 web portal<sup>35</sup>. This initial annotation predicted a total of 1,401 putative transporter sequences and revealed  
373 the major facilitator superfamily (MFS) and the ATP-binding cassette (ABC) transporters to be the largest  
374 transporter families (Supplementary Table 1). We focused on MFS transporters, which are classified into  
375 more than 80 families<sup>53</sup>. We used one protein sequence from each MFS family as query to search candidate  
376 MFS transporters in the protein dataset from *P. armoraciae* using Blastp (E-value threshold of  $10^{-5}$ ), and  
377 assigned each candidate to an MFS family based on sequence similarity to transporter sequences deposited  
378 in TCDB. Additional candidates were identified by repeating the search procedure with an extended dataset  
379 including the candidate MFS transporters from *P. armoraciae*. The number of TMDs for each candidate  
380 was predicted using the TMHMM Server v.2.0<sup>54</sup>. Partial sequences encoding less than six predicted TMDs  
381 were removed from the dataset. The same strategy was used to identify putative MFS transporters in protein  
382 datasets that were predicted from the genomes of *Leptinotarsa decemlineata*, genome annotations v0.5.3<sup>55</sup>,  
383 *Anoplophora glabripennis*, assembly Agla\_1.0<sup>56</sup>, and *Tribolium castaneum*, assembly Tcas3.0<sup>57</sup>,  
384 respectively. The predicted protein sequences are provided in Supplementary Data 1.

385 **Digital gene expression analysis.** Digital gene expression analysis of putative MFS transporters identified  
386 in the *P. armoraciae* transcriptome was carried out using CLC Genomics workbench v 10.1 by mapping  
387 the Illumina reads from the second set of samples onto the reference transcriptome, and counting the reads  
388 to estimate gene expression levels. For the cloned major facilitator superfamily genes, complete open  
389 reading frames were used as reference sequences for mapping. For read alignment, we used the following

390 parameters: nucleotide mismatch cost = 2; insertion = deletion costs = 3; length fraction = 0.6; similarity  
391 fraction = 0.9; maximum number of hits for a read = 15. Each pair of reads was counted as two. Biases in  
392 the sequence datasets and different transcript sizes were corrected using the TPM (transcripts per kilobase  
393 million) normalization method to obtain correct estimates for relative expression levels between samples.

394 **Phylogenetic analyses of coleopteran MFS transporters.** We inferred the lineage-specific diversification  
395 patterns of putative MFS transporters from *P. armoraciae*, *L. decemlineata*, *A. glabripennis* and *T.*  
396 *castaneum* in phylogenetic analyses with two different datasets, one containing all identified MFS  
397 transporters (867 sequences), the other containing a subset of putative sugar porters (120 sequences) from  
398 the above four species and 35 sugar porters from *Chrysomela populi*<sup>52</sup>. The corresponding protein  
399 sequences were aligned using the MUSCLE algorithm<sup>58</sup> implemented in MEGA 7 with default parameters.  
400 The alignments were trimmed manually and the best substitution models were determined using ProtTest  
401 3.4.2<sup>59</sup>. Maximum-likelihood phylogenetic trees were constructed in IQ-TREE version 1.6.0<sup>60</sup> using the  
402 VT+G+F substitution model with 1000 ultrafast bootstrap replicates for the full dataset, and the LG+G+F  
403 substitution model with 1000 bootstrap replicates for the subset of putative sugar porters.

404 **Identification and sequencing of candidate transporters.** Based on our phylogenetic analysis, we  
405 selected the largest clade of putative MFS transporters that was specifically expanded in *P. armoraciae* for  
406 further studies. Transcriptome analysis revealed the presence of a pseudogene (*PaMFS9-ps*) that shares  
407 between 43 and 95% nucleotide sequence identity with members of the focal clade. The protein encoded  
408 by this pseudogene is predicted to possess only two transmembrane domains due to a premature stop codon  
409 caused by frame shift mutations in the coding sequence. To obtain the full-length open reading frames  
410 (ORFs) of partial transcripts, we performed rapid amplification of cDNA ends-PCR as described before<sup>23</sup>.  
411 All full length ORFs were cloned into the pCR<sup>TM</sup>4-TOPO<sup>®</sup> TA (Thermo Fisher Scientific) for sequence  
412 verification.

413 **Tissue-specific expression of candidate transporters.** We used quantitative PCR (qPCR) to analyze the  
414 expression of the candidate transporter genes in the foregut, midgut, hindgut, Malpighian tubules, and other  
415 tissues of one-day old adult *P. armoraciae* beetles ( $n = 4$  biological replicates, each with two technical  
416 replicates), respectively. In addition, expression of candidate transporter genes was analyzed in the  
417 proximal, central, and distal Malpighian tubule regions (Supplementary Fig. 2d) dissected from four-day  
418 old adult *P. armoraciae* beetles ( $n = 3$  biological replicates, each with two technical replicates). Primers  
419 (Supplementary Table 5) were designed using Primer3web version 4.1.0. Analyses of primer specificity  
420 and efficiency, RNA extraction, purification, cDNA synthesis, and qPCR were performed as described  
421 before<sup>61</sup>. Gene expression was normalized to the expression level of eukaryotic initiation factor 4A (*eIF4A*),  
422 which showed the lowest variability across tissues among four tested reference genes (Supplementary Table  
423 6).

424 **Expression of candidate transporters in insect cells.** For protein expression, we cloned each ORF without  
425 stop codon into the pIEx-4 expression vector (Novagen) in frame with the vector-encoded carboxy terminal  
426  $6 \times$  His-tag and sequenced the resulting constructs. Primer sequences are listed in Supplementary Table 5.  
427 One construct of each candidate gene was used for transfection of High Five™ insect cells (Gibco) cultured  
428 in Express Five® SFM medium (Gibco) supplemented with 20 mM glutamine (Gibco) and 50  $\mu$ g/mL  
429 gentamicin (Gibco). Confluent insect cells were diluted 1:5, dispensed in 500  $\mu$ L-aliquots into 24-well  
430 plates, and incubated at 27 °C. On the next day, we transfected the cells using FuGENE HD Transfection  
431 Reagent (Promega) according to the manufacturer's protocol. Cells treated with transfection reagent only  
432 were used as a negative control. After 48 h we harvested the cells for Western blotting and uptake assays.

433 **Western blotting.** To confirm protein expression, transfected insect cells were washed twice with  
434 phosphate buffered saline (PBS; pH 7.4), collected by centrifugation, and resuspended in hypotonic buffer  
435 (20 mM Tris-HCl (pH 7.5), 5 mM EDTA, 1 mM DTT, 0.1% Benzonase nuclease (Merck Millipore) (v/v),  
436 and protease inhibitors (cComplete Mini, EDTA-free, Roche Diagnostics GmbH)). After incubation on ice  
437 for 10 min, the samples were frozen in liquid nitrogen, thawed, and centrifuged ( $16,000 \times g$  for 15 min at

438 4 °C). The resulting cell pellet was resuspended in hypotonic buffer and used for Western blotting using  
439 HRP-conjugated anti-His antibody (1: 10,000; Novex, Life technologies).

440 **Glucoside uptake assays with transfected insect cells.** Cells were washed with PBS (pH 5.5) by pipetting  
441 and incubated with different glucoside substrates at 200  $\mu$ M in PBS (pH 5.5) for 1 h at 27 °C. Assays were  
442 performed with substrate mixtures containing seven different glucosinolates (2-propenyl glucosinolate  
443 (Roth), 4-methylsulfinylbutyl glucosinolate (Phytoplan), 4-methylthiobutyl glucosinolate (Phytoplan), 2-  
444 phenylethyl glucosinolate (Phytoplan), benzyl glucosinolate (Phytoplan), 4-hydroxybenzyl glucosinolate  
445 (isolated from *Sinapis alba* seeds as described before<sup>62</sup>), and indol-3-ylmethyl (I3M) glucosinolate  
446 (Phytoplan)), or five other plant glycosides (salicin (Sigma-Aldrich), linamarin (BIOZOL), dhurrin (Roth),  
447 catalpol (Sigma-Aldrich), and aucubin (Sigma-Aldrich). After incubation, cells were washed three times  
448 with ice-cold PBS (pH 5.5) by pipetting, collected in 300  $\mu$ L 80% (v/v) methanol, frozen in liquid nitrogen,  
449 thawed, and centrifuged at 3,220  $\times$  g for 10 min at 4 °C. The supernatant was dried by vacuum centrifugation,  
450 dissolved in ultrapure water and analyzed by liquid chromatography coupled with tandem mass  
451 spectrometry (LC-MS/MS). All glucoside uptake assays were performed in triplicates. The amount of each  
452 substrate in transporter-expressing cells was compared with that detected in control cells. Transporters were  
453 considered active towards a substrate when the average amounts detected in transporter-expressing cells  
454 were at least twofold higher than those detected in control cells.

455 **Cloning of *PaGTRI* into the pNB1u vector and cRNA synthesis.** We amplified the open reading frame  
456 of *PaGTRI* without stop codon by PCR using uracil-containing primers (Supplementary Table 5). The 3'  
457 primer was designed to encode a Human influenza hemagglutinin (HA)-tag to enable the detection of  
458 recombinant protein by Western blotting if necessary. The pNB1u vector was digested overnight at 37 °C  
459 with PacI and Nt.BbvCI (New England Biolabs) to generate 8-nt overhangs. One microliter gel-purified  
460 PCR product (100 ng/ $\mu$ L) was combined with 1  $\mu$ L gel-purified vector (50 ng/ $\mu$ L), 1 unit USER enzyme,  
461 2  $\mu$ L 5 x PCR reaction buffer and 5  $\mu$ L H<sub>2</sub>O, incubated at 37 °C for 25 min followed by 25 min at room  
462 temperature. After transformation of chemically competent *E. coli* cells, colonies containing the appropriate

463 insert were identified by Sanger sequencing. The DNA template for cRNA synthesis was amplified by PCR  
464 from the *X. laevis* expression construct using pNB1uf/r primers (Supplementary Table 5) and cRNA was  
465 synthesized using the mMESSAGE mMACHINE™ T7 Transcription Kit (Invitrogen) according to the  
466 manufacturer's manual.

467 **Biochemical characterization of PaGTR1 in *Xenopus* oocytes.** The cRNA concentration was adjusted to  
468 800 ng/μL with RNase-free water for oocyte injection. *X. laevis* oocytes (Ecocyte Bioscience) were injected  
469 with 50 nL containing 40 ng cRNA or with 50 nL pure water as a control using a Drummond NANOJECT  
470 II (Drummond Scientific Company) or a Nanoliter 2010 Injector (World Precision Instruments).

471 Injected oocytes were incubated in Kulori buffer (90 mM NaCl, 1 mM KCl, 1 mM MgCl<sub>2</sub>, 1 mM CaCl<sub>2</sub>  
472 and 5 mM 4-(2-hydroxyethyl)-1-piperazineethanesulfonic acid (HEPES), pH 7.4) supplemented with 50  
473 μg/mL gentamicin at 16 °C for three days until assaying. All transport assays were performed at room  
474 temperature. Injected oocytes were pre-incubated for 5 min in Kulori buffer (90 mM NaCl, 1 mM KCl, 1  
475 mM MgCl<sub>2</sub>, 1 mM CaCl<sub>2</sub> and 5 mM 2-(N-morpholino)ethanesulfonic acid (MES), pH 6.0) before they were  
476 transferred into the same buffer containing the substrate(s). To determine the substrate preference of  
477 PaGTR1, we incubated oocytes in Kulori buffer (pH 6.0) containing an equimolar mixture of 2-propenyl  
478 glucosinolate, 4-methylsulfinylbutyl glucosinolate, 4-methylthiobutyl glucosinolate, 2-phenylethyl  
479 glucosinolate, benzyl glucosinolate, 4-hydroxybenzyl glucosinolate, and I3M glucosinolate, each at 200  
480 μM, for 1 h.

481 The pH dependency of glucosinolate transport was determined by incubating the injected oocytes with  
482 100 μM I3M glucosinolate for 10 min in Kulori buffer adjusted to different pH values. The effects of  
483 different ionophores on glucosinolate transport was studied by incubating the PaGTR1-expressing oocytes  
484 in Kulori buffer at pH 6.0 containing either 20 μM carbonyl cyanide *m*-chlorophenyl hydrazone (H<sup>+</sup>  
485 ionophore, Sigma-Aldrich), 20 μM nigericin (K<sup>+</sup>/H<sup>+</sup> exchanger, Abcam), or 20 μM valinomycin (K<sup>+</sup>  
486 ionophore, Abcam), for 15 min. Afterwards, we incubated the oocytes in Kulori buffer containing 100 μM



487 I3M glucosinolate and the corresponding ionophore for 10 min. Assays performed with oocytes incubated  
488 in Kulori buffer without any ionophore served as a control.

489 The time course of I3M glucosinolate uptake was analyzed by incubating oocytes with 100  $\mu$ M I3M  
490 glucosinolate in Kulori buffer (pH 6.0) for 5, 10, 20, 30, 45, 60, 120, 180, and 240 min, respectively. The  
491 apparent  $K_m$  value of *PaGTR1* for I3M glucosinolate was determined by incubating injected oocytes in  
492 Kulori buffer (pH 6.0) for 10 min with different substrate concentrations. The  $K_m$  value was calculated by  
493 nonlinear regression analysis in SigmaPlot 14.0 (Systat Software Inc.).

494 Each assay consisted of 14-15 oocytes and was stopped by washing oocytes four times with Kulori  
495 buffer. Afterwards, 12 of the washed oocytes were distributed into four Eppendorf tubes, with three oocytes  
496 per tube and immediately homogenized in 100  $\mu$ L of 50% (v/v) methanol. After centrifugation ( $21,380 \times g$   
497 or  $16,000 \times g$  for 15 min), the supernatant was incubated at  $-20^\circ\text{C}$  for at least 1 h to precipitate proteins,  
498 which were pelleted by centrifugation ( $21,380 \times g$  or  $16,000 \times g$  for 15 min). Finally, 60  $\mu$ L sample was  
499 diluted with 120  $\mu$ L ultrapure water, filtered through a 0.22  $\mu$ m PVDF-based filter plate (Merck Millipore),  
500 and analyzed by LC-MS/MS. The glucosinolate concentration in oocytes was calculated by assuming an  
501 oocyte volume of 1  $\mu$ L<sup>63</sup>.

502 **LC-MS/MS.** Glucosinolates were quantified by LC-MS/MS using an Agilent 1200 HPLC system  
503 connected to an API3200 tandem mass spectrometer (AB SCIEX). Separation was achieved on an  
504 EC 250/4.6 NUCLEODUR Sphinx RP column (250 mm  $\times$  4.6 mm, 5  $\mu$ m; Macherey–Nagel) using a binary  
505 solvent system consisting of 0.2% (v/v) formic acid in water (A) and acetonitrile (B), with a flow rate of  
506 1 mL/min at  $25^\circ\text{C}$ . The elution gradient was: 0-1 min, 1.5% B; 1-6 min, 1.5–5% B; 6-8 min, 5–7% B; 8-  
507 18 min, 7–21% B; 18-23 min, 21–29% B; 23-23.1 min, 29–100% B; 23.1-24 min, 100% B; 24-24.1 min,  
508 100 to 1.5% B; 24.1-28 min, 1.5% B. Glucosinolates were detected in negative ionization mode. The ion  
509 spray voltage was set to  $-4,500$  V. Gas temperature was set to  $700^\circ\text{C}$ , curtain gas to 20 psi, collision gas to  
510 10, nebulizing gas to 70 psi, and drying gas to 60 psi. Non-host glucosides were quantified using an Agilent  
511 1200 HPLC system connected to an API5000 tandem mass spectrometer (AB SCIEX). Separation was

512 achieved on an Agilent XDB-C18 column (5 cm × 4.6 mm, 1.8 μm) using a binary solvent system  
513 consisting of 0.05 % (v/v) formic acid in water (A) and acetonitrile (B) with a flow rate of 1.1 mL/min at  
514 25 °C. The elution gradient was: 0-0.5 min, 5% B; 0.5-2.5 min, 5–31% B; 2.5-2.52 min, 31–100% B; 2.52-  
515 3.5 min, 100% B; 3.5-3.51 min, 100–5% B; 3.51-6 min, 5% B. Compounds were detected in negative  
516 ionization mode with ion spray voltage set to -4,500 V. The gas temperature was set to 700 °C, curtain gas  
517 to 30 psi, collision gas to 6, both nebulizing gas and drying gas to 60 psi. Multiple reaction monitoring  
518 (MRM) was used to monitor the transitions from precursor ion to product ion for each compound  
519 (Supplementary Table 7). Compounds were quantified using external standard curves. Analyst Software  
520 1.6 Build 3773 (AB Sciex) was used for data acquisition and processing.

521 Samples from the pH-dependency experiment were analyzed by LC-MS/MS using an Advance UHPLC  
522 system (Bruker) connected to an EVOQ Elite TripleQuad mass spectrometer (Bruker) equipped with an  
523 electrospray ion source. Separation was achieved on an Kinetex 1.7u XB-C18 column (100 × 2.1 mm, 1.7  
524 μm, 100 Å, Phenomenex) using a binary solvent system consisting of 0.05 % (v/v) formic acid in water (A)  
525 and acetonitrile with 0.05% (v/v) formic acid (B), with a flow rate of 0.4 mL/min at 40 °C. The elution  
526 gradient was: 0-0.2 min, 2% B; 0.2-1.8 min, 2-30% B; 1.8-2.5 min 30-100% B, 2.5-2.8 min 100% B, 2.8-  
527 2.9 min, 100-2% B and 2.9-4.0 min 2% B. Glucosinolates were detected in negative ionization mode. The  
528 instrument parameters were optimized by infusion experiments with pure standards. The ion spray voltage  
529 was set to -4,000 V. Cone temperature was set to 350 °C, cone gas to 20 psi, heated probe temperature to  
530 200 °C, and probe gas flow to 50 psi. Nebulizing gas was set to 60 psi, and collision gas to 1.6 mTorr.  
531 MRM parameters are provided in Supplementary Table 7. Bruker MS Workstation software (Version 8.2.1,  
532 Bruker) was used for data acquisition and processing of glucosinolates. All other samples from experiments  
533 using oocyte expression system were analyzed using the LC-MS/MS method described above for insect  
534 cell-based assays. The concentrations of all glucosinolates in the substrate preference assay were  
535 determined using external standard curves. Assays performed to characterize I3M glucosinolate transport  
536 were quantified using 2-propenyl glucosinolate as internal standard.

537 **Double-stranded RNA synthesis.** We synthesized seven different double-stranded RNAs (dsRNAs)  
538 between 120 and 298 bp in length, one specific for each *PaGTR1/2/3/5/6/7/8*, respectively, and a 223-bp  
539 fragment of the inducible metalloproteinase inhibitor (*IMPI*) from the greater wax moth *Galleria mellonella*  
540 (AY330624.1) (*dsIMPI*) using the T7 RiboMAX™ Express RNAi System (Promega). *In silico* off-target  
541 prediction was done by searches of all possible 21-mers of both RNA strands against the local *P.*  
542 *armoraciae* transcriptome database allowing for two mismatches. Except for *PaGTR5*, the prediction did  
543 not find any off-target towards putative transporter genes in the transcriptome (Supplementary Table 8).

544 **Function of *PaGTR1* in vivo.** To analyze the function of *PaGTR1*, we injected newly emerged adult *P.*  
545 *armoraciae* beetles (reared on *B. juncea*) with 100 nL ultrapure water containing 80 ng of *dsPaGTR1* or 80  
546 ng of *dsIMPI*, respectively, using a Nanoliter 2010 Injector (World Precision Instruments). Injected beetles  
547 were provided with detached leaves of three to four-week old *B. juncea* plants and kept in plastic containers  
548 with moistened tissue in the laboratory under ambient conditions. Four days after dsRNA injection, we  
549 collected *dsIMPI*-injected and *dsPaGTR1*-injected beetles for gene expression analysis ( $n = 5$  replicates,  
550 three beetles per replicate) and glucosinolate analysis ( $n = 10$  replicates, three beetles per replicate),  
551 respectively. The remaining beetles were used for a sequestration experiment with *Arabidopsis thaliana*  
552 Col-0 (*Arabidopsis*) plants that had been cultivated in a growth chamber at 21 °C, 55% relative humidity,  
553 and a 10-h photoperiod. To compare the accumulation and excretion of ingested glucosinolates in *dsIMPI*-  
554 injected and *dsPaGTR1*-injected beetles, we fed beetles with detached *Arabidopsis* leaves in Petri dishes  
555 (60 mm diameter) that contained 50  $\mu$ L of ultrapure water and were sealed with parafilm to prevent leaf  
556 wilting ( $n = 9$  replicates for day 4,  $n = 10$  replicates for other days, 5 beetles per replicate). Feeding assays  
557 were performed in the laboratory under ambient conditions, and leaves were exchanged every day for five  
558 consecutive days. To estimate how much the beetles fed, we determined the weight of each leaf before and  
559 after feeding. Feces were collected every day using 100  $\mu$ L of ultrapure water per replicate, combined with  
560 300  $\mu$ L of pure methanol in a 1.5 mL Eppendorf tube and dried by vacuum centrifugation. Feces samples  
561 were then homogenized in 200  $\mu$ L 80% (v/v) methanol using metal beads (2.4 mm diameter, Askubal) in a

562 tissue lyzer (Qiagen) for 1 min at 30 Hz. After feeding, adults were starved for one day, weighed, frozen in  
563 liquid nitrogen, and stored at -20 °C until glucosinolate extraction. Beetle samples were homogenized using  
564 a plastic pestle in 200  $\mu$ L 80% (v/v) methanol. All samples were then extracted with 1 mL 80% (v/v)  
565 methanol containing 25  $\mu$ M 4-hydroxybenzyl glucosinolate as internal standard. After centrifugation  
566 (16,000  $\times$  g for 10 min), glucosinolates were extracted from the supernatant, converted to desulfo-  
567 glucosinolates, and analyzed by HPLC-UV as described before<sup>23</sup>. The glucosinolate content in adults or  
568 feces was calculated in nanomole per adult, respectively.

569 To confirm the specificity of *PaGTR1* knock-down we analyzed the effect of *dsPaGTR1* injection on  
570 the expression of *PaGTR2*, *PaGTR3*, *PaGTR9*, and *PaGTR10*. *PaGTR9* and *PaGTR10* share the highest  
571 nucleotide sequence similarity (69% sequence identity) with *PaGTR1*. *PaGTR2* and *PaGTR3* expression  
572 was analyzed because the recombinant transporters also used indol-3-ylmethyl (I3M) glucosinolate as a  
573 substrate. RNA extraction, purification, cDNA synthesis, and qPCR were performed as described before<sup>61</sup>.

574 **Function of *PaGTR5/6/7/8* in vivo.** To analyze the function of *PaGTR5/6/7/8*, we injected newly emerged  
575 adult *P. armoraciae* beetles that had fed for two days on *B. juncea* leaves with 100 nL ultra pure water  
576 containing 100 ng of *dsIMPI* or each 100 ng of *dsPaGTR5/6/7/8* using a Nanoliter 2010 Injector (World  
577 Precision Instruments). A subset of the dsRNA-injected beetles were fed with detached leaves of  
578 *Arabidopsis* plants in plastic containers with moistened tissue for gene expression analysis ( $n = 6$  replicates,  
579 two beetles per replicate). The remaining dsRNA-injected beetles were used for a sequestration experiment  
580 with *Arabidopsis* plants to compare the accumulation and excretion of previously stored and ingested  
581 glucosinolates in *dsIMPI*-injected and *dsPaGTR5/6/7/8*-injected beetles. We fed the injected beetles with  
582 detached *Arabidopsis* leaves in Petri dishes (60 mm diameter) that contained 30  $\mu$ L of ultrapure water and  
583 were sealed with parafilm to prevent leaf wilting ( $n = 10$  replicates, 6 beetles per replicate). Feeding assays  
584 were performed in the laboratory under ambient conditions, and leaves were exchanged every day for six  
585 consecutive days. To estimate how much the beetles fed, we determined the weight of each leaf before and  
586 after feeding. Starting from the second day, feces were collected as above for five days. After drying by

587 vacuum centrifugation, feces were homogenized in 1 mL 80% (v/v) methanol using metal beads (2.4 mm  
588 diameter, Askubal) in a tissue lyzer (Qiagen) for 1 min at 30 Hz. Fed adults were starved for one day,  
589 weighed and frozen in liquid nitrogen until glucosinolate extraction. All samples were extracted and  
590 analyzed as described above except that an EC 250/4.6 NUCLEODUR 100-5 C18ec column (250 mm ×  
591 4.6 mm, 5 µm; Macherey–Nagel) was used for analyzing glucosinolates by HPLC-UV.

592 To confirm the specificity of *PaGTR5/6/7/8* knock-down, we analyzed the effect of *dsPaGTR5/6/7/8*  
593 injection on the expression of *PaGTR9* and *PaGTR10*, which share the highest nucleotide sequence  
594 similarity (67%-69% sequence identity) with *PaGTR5/6/7/8*. RNA extraction, purification, cDNA  
595 synthesis, and qPCR were performed as described before<sup>61</sup>.

596 **Function of *PaGTR2/3* in vivo.** To analyze the functions of *PaGTR2* and *PaGTR3*, we injected third instar  
597 larvae of *P. armoraciae* (reared on *B. rapa*) with 100 nL ultrapure water containing 80 ng of *dsPaGTR2*-  
598 and 80 ng of *dsPaGTR3* (*dsPaGTR2/3*) or 80 ng of *dsIMPI*, respectively, using a Nanoliter 2010 Injector  
599 (World Precision Instruments). Injected larvae were provided with detached *B. rapa* petioles and kept in  
600 plastic tubes with moistened tissue in the laboratory under ambient conditions until pupation. Newly  
601 emerged adults were injected with dsRNAs as described above and provided with detached *B. rapa* leaves.  
602 Three days after the second dsRNA injection, we collected *dsIMPI*-injected and *dsPaGTR2/3*-injected  
603 beetles for gene expression analysis ( $n = 6$  replicates, two beetles per replicate) and glucosinolate analysis  
604 ( $n = 10$  replicates, three beetles per replicate), respectively. The remaining beetles were used for a feeding  
605 experiment with *Arabidopsis*. Each replicate consisted of one *Arabidopsis* leaf and three beetles that were  
606 placed in a Petri dish (60 mm diameter) with 50 µL of ultrapure water ( $n = 13$  replicates for *dsIMPI*-injected  
607 beetles,  $n = 12$  replicates for *dsPaGTR2/3*-injected beetles). Each leaf was photographed before and after  
608 feeding to determine the consumed leaf area. Fed leaves were frozen in liquid nitrogen, freeze-dried, and  
609 homogenized using metal beads (2.4 mm diameter, Askubal) in a tissue lyzer (Qiagen) for 2 min at 30 Hz.  
610 Fed beetles were starved for one day, weighed, frozen in liquid nitrogen, and stored at -20 °C until  
611 glucosinolate extraction. Beetle samples were homogenized using a plastic pestle in 200 µL 80% (v/v)

612 methanol. All samples were extracted with 1 mL 80% (v/v) methanol containing 25  $\mu$ M 1-methylethyl  
613 glucosinolate (extracted from *Sisymbrium officinale* seeds) as internal standard. Glucosinolates were  
614 analysed after conversion to desulfo-glucosinolates by HPLC-UV as described before<sup>23</sup>. All the samples  
615 were additionally analyzed by another chromatographic run with the same method as above except that an  
616 EC 250/4.6 NUCLEODUR 100-5 C18ec column (250 mm  $\times$  4.6 mm, 5  $\mu$ m; Macherey–Nagel) was used  
617 for analyzing glucosinolates that were not separated in the first chromatographic run. The glucosinolate  
618 content in adults and fed leaves was calculated in nanomole per adult and nanomole per cm<sup>2</sup> leaf,  
619 respectively. The ingested glucosinolate amount was calculated based on the ingested leaf area and the  
620 corresponding leaf glucosinolate content. To elucidate which proportion of the ingested glucosinolates was  
621 sequestered, we expressed the glucosinolate amount detected in the beetles relative to the ingested  
622 glucosinolate amount from the leaves, which was set to 100%.

623 **Glucosinolate concentration in the hemolymph of adult *P. armoraciae*.** Hemolymph was collected from  
624 seven-day old adult *P. armoraciae* reared on *B. juncea* by cutting off an abdominal leg and collecting the  
625 extruding droplet using glass capillaries (0.5  $\mu$ L, Hirschmann<sup>®</sup> minicaps<sup>®</sup>) ( $n = 6$  replicates, 50 beetles per  
626 replicate). The capillaries were marked with 1 mm intervals (corresponding to 15.6 nL) to estimate the  
627 volume of collected hemolymph. The hemolymph was diluted in 500  $\mu$ L 90% (v/v) methanol, homogenized  
628 using metal beads (2.4 mm diameter, Askubal) in a tissue lyzer (Qiagen) for 1 min at 30 Hz, and boiled for  
629 5 min at 95 °C. After two centrifugation steps (13,000  $\times g$  for 10 min each), the supernatant was dried by  
630 vacuum centrifugation, dissolved in 50  $\mu$ L 50% (v/v) methanol, diluted in water, and analyzed by LC-  
631 MS/MS.

632 **Morphology of the Malpighian tubule system of *P. armoraciae*.** To investigate the structure of the  
633 Malpighian tubule system, we dissected the gut including attached Malpighian tubules of four-day old *P.*  
634 *armoraciae* adults in PBS (pH 6.0) under a stereomicroscope. The tracheae that attach Malpighian tubules  
635 to the gut were removed using fine forceps to release the tubules. Pictures were taken with a Canon EOS  
636 600D camera.

637 **pH of hemolymph and excretion fluid of isolated Malpighian tubules of *P. armoraciae*.** The pH of the  
638 hemolymph and Malpighian tubule excretion fluid of five-day old *P. armoraciae* adults was assessed using  
639 the pH indicator bromothymol blue (Alfa Aesar). Hemolymph was collected by cutting off an abdominal  
640 leg and collecting the extruding droplet using a pipette ( $n = 3$  replicates, six to ten beetles per replicate).  
641 Excretion fluid was collected from dissected Malpighian tubules that were incubated in saline A as  
642 described for the Ramsay assay ( $n = 4$  replicates). Hemolymph and excretion fluid were immediately mixed  
643 with the same volume of 0.16% (w/v) bromothymol blue dissolved in 10% (v/v) ethanol, respectively,  
644 under water-saturated paraffin oil in a Sylgard-coated petri dish. The resulting color of the droplet was  
645 compared with those of citric acid– $\text{Na}_2\text{HPO}_4$  buffer solutions ranging from pH 5.2 to 6.6 in 0.2 increments  
646 mixed with 0.16% (w/v) bromothymol blue.

647 **Fate of plant glucosides injected in *P. armoraciae* beetles.** To analyze the fate of plant glucosides *in vivo*,  
648 we injected 100 nL of an equimolar mixture of 2-propenyl glucosinolate, 4-hydroxybenzyl glucosinolate,  
649 linamarin, salicin and catalpol, each at 10 mM, and 0.15% (w/v) amaranth into the hemolymph of two-day  
650 old adult *P. armoraciae* (reared on *B. rapa*). One group of beetles was sampled 30 minutes after injection  
651 by freezing beetles in liquid nitrogen ( $n = 10$  replicates, five beetles per replicate). The remaining beetles  
652 were fed with detached leaves of *Arabidopsis* in Petri dishes (60 mm diameter) in the laboratory under  
653 ambient conditions ( $n = 10$  replicates, 5 beetles per replicate). We added 30  $\mu\text{L}$  of ultrapure water to each  
654 Petri dish and sealed them with parafilm to prevent leaf wilting. After one day, we sampled the beetles as  
655 described above ( $n = 10$  replicates, five beetles per replicate). Feces were collected using 100  $\mu\text{L}$  of  
656 ultrapure water per replicate and combined with 300  $\mu\text{L}$  of pure methanol in a 1.5 mL Eppendorf tube. All  
657 samples were stored at  $-20^\circ\text{C}$  until extraction. Beetle and feces samples were homogenized as described in  
658 the RNAi experiment. After centrifugation ( $16,000 \times g$  for 10 min), the supernatant was dried by vacuum  
659 centrifugation, dissolved in 100  $\mu\text{L}$  of ultrapure water and analyzed by LC-MS/MS. The glucoside content  
660 in adults or feces was calculated as nanomole per adult, respectively.

661 **Ramsay assay.** To analyze the excretion of plant glucosides *in situ*, we performed Ramsay assays<sup>64</sup> with  
662 dissected Malpighian tubules from four to five-day old *P. armoraciae* adults reared on *B. rapa*  
663 (Supplementary Fig. 6). Malpighian tubules were dissected in saline A (100 mM NaCl, 8.6 mM KCl, 2 mM  
664 CaCl<sub>2</sub>, 8.5 mM MgCl<sub>2</sub>, 4 mM NaH<sub>2</sub>PO<sub>4</sub>, 4 mM NaHCO<sub>3</sub>, 24 mM glucose, 10 mM proline, 25 mM 3-(N-  
665 Morpholino)propanesulfonic acid (MOPS), pH 6.0)<sup>65</sup>. Single tubules were transferred into a 10 µL droplet  
666 of saline B (60 mM NaCl, 10.3 mM KCl, 2.4 mM CaCl<sub>2</sub>, 10.2 mM MgCl<sub>2</sub>, 4.8 mM NaH<sub>2</sub>PO<sub>4</sub>, 4.8 mM  
667 NaHCO<sub>3</sub>, 28.8 mM glucose, 12 mM proline, 30 mM MOPS, 1 mM cyclic AMP, pH 6.0) under water-  
668 saturated paraffin oil in a Sylgard-coated petri dish. The proximal end of the tubule was pulled out of the  
669 droplet, attached to a metal pin and cut using a glass capillary to allow the collection of excretion fluid. To  
670 start the assay, we added two microliters of an equimolar glucoside mixture consisting of 2-propenyl  
671 glucosinolate, 4-methylsulfinylbutyl glucosinolate, 4-hydroxybenzyl glucosinolate, 2-phenylethyl  
672 glucosinolate, I3M glucosinolate, linamarin, salicin, catalpol, each at 40 mM, and 0.6% (w/v) amaranth)  
673 to saline B. After two to three hours, we collected the excretion fluid and 2 µL of the bathing droplet in 300  
674 µL 80% (v/v) methanol, respectively. The Malpighian tubule was washed three times in about 15 mL of  
675 saline A and afterwards transferred into 300 µL of 80% (v/v) methanol. All samples were stored at -20 °C  
676 until extraction. Malpighian tubule samples were homogenized using a plastic pestle. After centrifugation  
677 (16,000 × g for 10 min), the supernatant was dried by vacuum centrifugation, dissolved in 70 µL ultrapure  
678 water and analyzed by LC-MS/MS. Out of 36 assays, 25 assays were excluded because no excretion fluid  
679 was visible within 2-3 hours.

680 **Statistical analysis.** No statistical methods were used to predetermine sample size. Statistical analyses were  
681 conducted in R 3.5.1<sup>66</sup> or in SigmaPlot 14.0 (Systat Software, Inc). Two groups were compared by two-  
682 tailed Student's *t*-test, two-tailed Student's paired *t*-test, Mann-Whitney *U* test or the method of generalized  
683 least squares<sup>67</sup>, depending on the variance homogeneity and the normality of residuals. Three or more  
684 groups were compared by one-way analysis of variance (ANOVA) followed by post hoc multiple  
685 comparisons test, or the method of generalized least squares<sup>67</sup>. If necessary, data were transformed prior to



686 analysis. For comparisons using the method of generalized least squares, we applied the varIdent variance  
687 structure which allows each group to have a different variance. The *P*-value was obtained by comparing  
688 models with and without explanatory variable using a likelihood ratio test<sup>68</sup>. Significant differences between  
689 groups were revealed with factor level reductions<sup>69</sup>. Information about data transformation, statistical  
690 methods, and results of the statistical analyses are summarized in Supplementary Tables 3, 4 and 9.

691 **Reporting summary.** Further information on research design is available in the Nature Research  
692 Reporting Summary linked to this article.

### 693 **Data availability**

694 The data that support the findings of this study are available from the corresponding author upon  
695 request. Source data of this study is available at the open access data repository of the Max Planck  
696 Society (Edmond) under <https://dx.doi.org/10.17617/3.4z>. The sequences of the genes cloned in  
697 this paper have been deposited in the GenBank database (accession nos. MN433061–MN433082).

### 698 **References**

- 699 1. Simon J.-C., *et al.* Genomics of adaptation to host-plants in herbivorous insects. *Brief. Funct.*  
700 *Genomics* **14**, 413-423 (2015).  
701
- 702 2. Ali J. G. & Agrawal A. A. Specialist versus generalist insect herbivores and plant defense. *Trends*  
703 *Plant Sci.* **17**, 293-302 (2012).  
704
- 705 3. Edger P. P., *et al.* The butterfly plant arms-race escalated by gene and genome duplications. *Proc.*  
706 *Natl. Acad. Sci. USA* **112**, 8362-8366 (2015).  
707
- 708 4. Gouin A., *et al.* Two genomes of highly polyphagous lepidopteran pests (*Spodoptera frugiperda*,  
709 Noctuidae) with different host-plant ranges. *Sci. Rep.* **7**, 1-12 (2017).  
710
- 711 5. Heckel D. G. Insect detoxification and sequestration strategies. *Annual Plant Reviews: Insect-Plant*  
712 *Interactions Ch. 3* (Wiley, Chichester, 2014).  
713
- 714 6. Petschenka G. & Agrawal A. A. How herbivores coopt plant defenses: natural selection, specialization,  
715 and sequestration. *Curr. Opin. Insect Sci.* **14**, 17-24 (2016).  
716
- 717 7. Zvereva E. L. & Kozlov M. V. The costs and effectiveness of chemical defenses in herbivorous insects:  
718 a meta-analysis. *Ecol. Monogr.* **86**, 107-124 (2016).

- 719  
720 8. Bernays E. & Graham M. On the evolution of host specificity in phytophagous arthropods. *Ecology*  
721 **69**, 886-892 (1988).  
722
- 723 9. Robert C. A., *et al.* Sequestration and activation of plant toxins protect the western corn rootworm  
724 from enemies at multiple trophic levels. *eLife* **6**, (2017).  
725
- 726 10. Petschenka G. & Agrawal A. A. Milkweed butterfly resistance to plant toxins is linked to sequestration,  
727 not coping with a toxic diet. *Proc. Biol. Sci.* **282**, 20151865 (2015).  
728
- 729 11. Opitz S. E. W. & Müller C. Plant chemistry and insect sequestration. *Chemoecology* **19**, 117–154  
730 (2009).  
731
- 732 12. Jeschke V. & Burow M. Glucosinolates. *eLS* (Wiley, Chichester, 2018).  
733
- 734 13. Blažević I., *et al.* Glucosinolate structural diversity, identification, chemical synthesis and metabolism  
735 in plants. *Phytochemistry* **169**, 112100 (2019).  
736
- 737 14. Kissen R., Rossiter J. T. & Bones A. M. The ‘mustard oil bomb’: not so easy to assemble?!  
738 Localization, expression and distribution of the components of the myrosinase enzyme system.  
739 *Phytochem. Rev.* **8**, 69-86 (2009).  
740
- 741 15. Wittstock U., Kurzbach E., Herfurth A.-M. & Stauber E. J. Glucosinolate breakdown. *Glucosinolates*  
742 *Ch. 6* (Elsevier, London, 2016).  
743
- 744 16. Jeschke V., Gershenzon J. & Vassão D. G. A mode of action of glucosinolate-derived isothiocyanates:  
745 detoxification depletes glutathione and cysteine levels with ramifications on protein metabolism in  
746 *Spodoptera littoralis*. *Insect Biochem. Molec.* **71**, 37-48 (2016).  
747
- 748 17. Burow M., Müller R., Gershenzon J. & Wittstock U. Altered glucosinolate hydrolysis in genetically  
749 engineered *Arabidopsis thaliana* and its influence on the larval development of *Spodoptera littoralis*.  
750 *J. Chem. Ecol.* **32**, 2333-2349 (2006).  
751
- 752 18. Li Q., Eigenbrode S. D., Stringam G. & Thiagarajah M. Feeding and growth of *Plutella xylostella* and  
753 *Spodoptera eridania* on *Brassica juncea* with varying glucosinolate concentrations and myrosinase  
754 activities. *J. Chem. Ecol.* **26**, 2401-2419 (2000).  
755
- 756 19. Falk K. L., *et al.* The role of glucosinolates and the jasmonic acid pathway in resistance of *Arabidopsis*  
757 *thaliana* against molluscan herbivores. *Mol. Ecol.* **23**, 1188-1203 (2014).  
758
- 759 20. Müller C., Agerbirk N., Olsen C. E., Boevé J.-L., Schaffner U. & Brakefield P. M. Sequestration of  
760 host plant glucosinolates in the defensive hemolymph of the sawfly *Athalia rosae*. *J. Chem. Ecol.* **27**,  
761 2505-2516 (2001).  
762
- 763 21. Kazana E., *et al.* The cabbage aphid: a walking mustard oil bomb. *Proc. Biol. Sci.* **274**, 2271-2277  
764 (2007).  
765
- 766 22. Aliabadi A., Renwick J. A. A. & Whitman D. W. Sequestration of glucosinolates by harlequin bug  
767 *Murgantia histrionica*. *J. Chem. Ecol.* **28**, 1749–1762 (2002).  
768

- 769 23. Beran F., *et al.* *Phyllotreta striolata* flea beetles use host plant defense compounds to create their own  
770 glucosinolate-myrosinase system. *Proc. Natl. Acad. Sci. USA* **111**, 7349-7354 (2014).  
771
- 772 24. Beran F., *et al.* One pathway is not enough: the cabbage stem flea beetle *Psylliodes chrysocephala*  
773 uses multiple strategies to overcome the glucosinolate-myrosinase defense in its host plants. *Front.*  
774 *Plant. Sci.* **9**, 1754 (2018).  
775
- 776 25. Yang Z.-L., Kunert G., Sporer T., Körnig J. & Beran F. Glucosinolate abundance and composition in  
777 Brassicaceae influence sequestration in a specialist flea beetle. *J. Chem. Ecol.* **46**, 186–197 (2020).  
778
- 779 26. Sporer T., Körnig J. & Beran F. Ontogenetic differences in the chemical defence of flea beetles  
780 influence their predation risk. *Funct. Ecol.* **34**, 1370–1379 (2020).  
781
- 782 27. Müller C. & Wittstock U. Uptake and turn-over of glucosinolates sequestered in the sawfly *Athalia*  
783 *rosae*. *Insect Biochem. Molec.* **35**, 1189-1198 (2005).  
784
- 785 28. van Geem M., Harvey J. A. & Gols R. Development of a generalist predator, *Podisus maculiventris*,  
786 on glucosinolate sequestering and nonsequestering prey. *Naturwissenschaften* **101**, 707-714 (2014).  
787
- 788 29. Abdalsamee M. K., M. G., Niehaus K. & Müller C. Rapid incorporation of glucosinolates as a strategy  
789 used by a herbivore to prevent activation by myrosinases. *Insect Biochem. Mol. Biol.* **52**, 115-123  
790 (2014).  
791
- 792 30. Strauss A. S., Peters S., Boland W. & Burse A. ABC transporter functions as a pacemaker for  
793 sequestration of plant glucosides in leaf beetles. *eLife* **2**, e01096 (2013).  
794
- 795 31. Kowalski P., Baum M., Körten M., Donath A. & Dobler S. ABCB transporters in a leaf beetle respond  
796 to sequestered plant toxins. *Proc. Royal Soc. B* **287**, 20201311 (2020).  
797
- 798 32. Nielsen J. K. Host plant-selection of monophagous and oligophagous flea beetles feeding on crucifers.  
799 *Entomol. Exp. Appl.* **24**, 562-569 (1978).  
800
- 801 33. Nielsen J. K., Dalgaard L., Larsen L. M. & Sørensen H. Host plant selection of the horse-radish flea  
802 beetle *Phyllotreta armoraciae* (Coleoptera: Chrysomelidae): feeding responses to glucosinolates from  
803 several crucifers. *Entomol. Exp. Appl.* **25**, 227-239 (1979).  
804
- 805 34. Vig K. & Verdyck P. Data on the host plant selection of the horseradish flea beetle, *Phyllotreta*  
806 *armoraciae* (Koch, 1803) (Coleoptera, Chrysomelidae, Alticinae). *Mededelingen van de Faculteit*  
807 *Landbouwwetenschappen Universiteit Gent* **66**, 277-283 (2001).  
808
- 809 35. Elbourne L. D., Tetu S. G., Hassan K. A. & Paulsen I. T. TransportDB 2.0: a database for exploring  
810 membrane transporters in sequenced genomes from all domains of life. *Nucleic Acids Res.* **45**, D320-  
811 D324 (2017).  
812
- 813 36. Law C. J., Maloney P. C. & Wang D. N. Ins and outs of major facilitator superfamily antiporters.  
814 *Annu. Rev. Microbiol.* **62**, 289-305 (2008).  
815
- 816 37. Quistgaard E. M., Low C., Guettou F. & Nordlund P. Understanding transport by the major facilitator  
817 superfamily (MFS): structures pave the way. *Nat. Rev. Mol. Cell Biol.* **17**, 123-132 (2016).  
818

- 819 38. Meredith J., Moore L. & Scudder G. Excretion of ouabain by Malpighian tubules of *Oncopeltus*  
820 *fasciatus*. *Am. J. Physiol-Reg. I.* **246**, R705-R715 (1984).  
821
- 822 39. O'Donnell M. Too much of a good thing: how insects cope with excess ions or toxins in the diet. *J.*  
823 *Exp. Biol.* **212**, 363-372 (2009).  
824
- 825 40. Chapman R. F. Alimentary canal, digestion and absorption. *The Insects: Structure and Function Part*  
826 *3* (Cambridge University Press, New York, 2013).  
827
- 828 41. Kikawada T., *et al.* Trehalose transporter 1, a facilitated and high-capacity trehalose transporter, allows  
829 exogenous trehalose uptake into cells. *Proc. Natl. Acad. Sci. USA* **104**, 11585-11590 (2007).  
830
- 831 42. Kikuta S., Hagiwara-Komoda Y., Noda H. & Kikawada T. A novel member of the trehalose transporter  
832 family functions as an H<sup>+</sup>-dependent trehalose transporter in the reabsorption of trehalose in  
833 Malpighian tubules. *Front. Physiol.* **3**, 290 (2012).  
834
- 835 43. Price D. R. & Gatehouse J. A. Genome-wide annotation and functional identification of aphid GLUT-  
836 like sugar transporters. *BMC genomics* **15**, 647 (2014).  
837
- 838 44. Nour-Eldin H. H., *et al.* NRT/PTR transporters are essential for translocation of glucosinolate defence  
839 compounds to seeds. *Nature* **488**, 531-534 (2012).  
840
- 841 45. Jørgensen M. E., *et al.* Origin and evolution of transporter substrate specificity within the NPF family.  
842 *eLife* **6**, (2017).  
843
- 844 46. Wang C., *et al.* Iridoids: research advances in their phytochemistry, biological activities, and  
845 pharmacokinetics. *Molecules* **25**, 287 (2020).  
846
- 847 47. Dobler S., Petschenka G. & Pankoke H. Coping with toxic plant compounds—the insect's perspective  
848 on iridoid glycosides and cardenolides. *Phytochemistry* **72**, 1593-1604 (2011).  
849
- 850 48. Willinger G. & Dobler S. Selective sequestration of iridoid glycosides from their host plants in  
851 *Longitarsus* flea beetles. *Biochem. Syst. Ecol.* **29**, 335-346 (2001).  
852
- 853 49. Nie R.-E., *et al.* The phylogeny of leaf beetles (Chrysomelidae) inferred from mitochondrial genomes.  
854 *Syst. Entomol.* **45**, 188-204 (2020).  
855
- 856 50. Opitz S. E., Boeve J.-L., Nagy Z. T., Sonet G., Koch F. & Müller C. Host shifts from Lamiales to  
857 Brassicaceae in the sawfly genus *Athalia*. *PLoS One* **7**, e33649 (2012).  
858
- 859 51. Nishida R. Sequestration of defensive substances from plants by Lepidoptera. *Annu. Rev. Entomol.* **47**,  
860 57-92 (2002).  
861
- 862 52. Schmidt L., Wielsch N., Wang D., Boland W. & Burse A. Tissue-specific profiling of membrane  
863 proteins in the salicin sequestering juveniles of the herbivorous leaf beetle, *Chrysomela populi*. *Insect*  
864 *Biochem. Mol. Biol.* **109**, 81-91 (2019).  
865
- 866 53. Saier M. H., Jr., Reddy V. S., Tsu B. V., Ahmed M. S., Li C. & Moreno-Hagelsieb G. The Transporter  
867 Classification Database (TCDB): recent advances. *Nucleic Acids Res.* **44**, D372-D379 (2016).  
868

- 869 54. Krogh A., Larsson B., Von Heijne G. & Sonnhammer E. L. Predicting transmembrane protein topology  
870 with a hidden Markov model: application to complete genomes. *J. Mol. Biol.* **305**, 567-580 (2001).  
871
- 872 55. Schoville S. D., *et al.* A model species for agricultural pest genomics: the genome of the Colorado  
873 potato beetle, *Leptinotarsa decemlineata* (Coleoptera: Chrysomelidae). *Sci. Rep.* **8**, 1931 (2018).  
874
- 875 56. McKenna D. D., *et al.* Genome of the Asian longhorned beetle (*Anoplophora glabripennis*), a globally  
876 significant invasive species, reveals key functional and evolutionary innovations at the beetle-plant  
877 interface. *Genome Biol.* **17**, 227 (2016).  
878
- 879 57. Richards S., *et al.* The genome of the model beetle and pest *Tribolium castaneum*. *Nature* **452**, 949-  
880 955 (2008).  
881
- 882 58. Kumar S., Stecher G. & Tamura K. MEGA7: Molecular evolutionary genetics analysis version 7.0 for  
883 bigger datasets. *Mol. Biol. Evol.* **33**, 1870-1874 (2016).  
884
- 885 59. Darriba D., Taboada G. L., Doallo R. & Posada D. ProtTest 3: fast selection of best-fit models of  
886 protein evolution. *Bioinformatics* **27**, 1164-1165 (2011).  
887
- 888 60. Nguyen L. T., Schmidt H. A., von Haeseler A. & Minh B. Q. IQ-TREE: a fast and effective stochastic  
889 algorithm for estimating maximum-likelihood phylogenies. *Mol. Biol. Evol.* **32**, 268-274 (2015).  
890
- 891 61. Beran F., *et al.* Novel family of terpene synthases evolved from *trans*-isoprenyl diphosphate synthases  
892 in a flea beetle. *Proc. Natl. Acad. Sci. USA* **113**, 2922-2927 (2016).  
893
- 894 62. Thies W. Isolation of sinigrin and glucotropaeolin from cruciferous seeds. *Fat Sci. Technol.* **90**, 311-  
895 314 (1988).  
896
- 897 63. Kelly S. M., Butler J. P. & Macklem P. T. Control of cell volume in oocytes and eggs from *Xenopus*  
898 *laevis*. *Comp. Biochem. Phys. A* **111**, 681-691 (1995).  
899
- 900 64. Ramsay J. Excretion by the Malpighian tubules of the stick insect, *Dixippus morosus* (Orthoptera,  
901 Phasmidae): amino acids, sugars and urea. *J. Exp. Biol.* **35**, 871-891 (1958).  
902
- 903 65. Browne A. & O'Donnell M. J. Mechanisms of calcium sequestration by isolated Malpighian tubules  
904 of the house cricket *Acheta domesticus*. *Arch. Insect Biochem. Physiol.* **97**, (2018).  
905
- 906 66. R Core Team. R: A language and environment for statistical computing (R Foundation for Statistical  
907 Computing, Vienna, 2018).  
908
- 909 67. Pinheiro J., Bates D., DebRoy S., Sarkar D. & R Core Team. Nlme: linear and nonlinear mixed effects  
910 models (2019).  
911
- 912 68. Zuur A. F., Ieno E. N., Walker N. J., Saveliev A. A. & Smith G. M. *Mixed effects models and extensions*  
913 *in ecology with R.* (Springer, New York, 2009).  
914
- 915 69. Crawley M. J. *The R Book.* (Wiley, Chichester, 2013).  
916  
917  
918

## 919 **Acknowledgements**

920 We thank T. G. Köllner, D. G. Heckel, J. Gershenson, S. O'Connor and M. Burow for comments  
921 on the manuscript, S. Donnerhacke, S. Gebauer-Jung, D. Schnabelrauch, L. Svenningsen, and A.  
922 Schilling for technical help, D. Yang for discussion on the project, and the greenhouse team at the  
923 MPI for Chemical Ecology for plant cultivation. This study was funded by the Max Planck Society.  
924 Additional support for this work was provided by Danish National Research Foundation grant  
925 DNRF99 (H. H. Nour-Eldin and C. Crocoll).

## 926 **Author contributions**

927 Z.-L.Y., and F.B. designed the study. F.B. supervised the study. H.H.N. supervised the  
928 experiments with oocytes. Z.-L.Y. performed most of the experiments. S.H. contributed to RACE-  
929 PCR and gene cloning. M.R. and C.C. contributed to LC-MS/MS and HPLC-UV analyses. F.B.  
930 and H.V. performed transcriptome analysis. F.S. performed analysis of glucosinolate  
931 concentration in hemolymph. Z.-L.Y. and F.B. conducted data analysis. Z.-L.Y., and F.B. wrote  
932 the manuscript. All authors commented on the manuscript.

## 933 **Competing interests**

934 The authors declare no competing interests.

## 935 **Additional information**

936 Correspondence and requests for materials should be addressed to F.B.
