# Supplementary material for: Sugar transporters enable a leaf beetle to accumulate plant defense compounds
Source: bioRxiv or medRxiv preprint supplement (doi:10.1101/2021.03.03.433712), 2021-03-04
Supplement: Supplementary file [file media-1.pdf]

## Supplementary Information

### Sugar transporters enable a leaf beetle to accumulate plant defense compounds

Zhi-Ling Yang<sup>1</sup>, Hussam Hassan Nour-Eldin<sup>2</sup>, Sabine Hänniger<sup>3</sup>, Michael Reichelt<sup>4</sup>, Christoph Crocoll<sup>2</sup>, Fabian Seitz<sup>1</sup>, Heiko Vogel<sup>3</sup> & Franziska Beran<sup>1\*</sup>

<sup>1</sup>Research Group Sequestration and Detoxification in Insects, Max Planck Institute for Chemical Ecology, Jena, Germany.

<sup>2</sup>DynaMo Center, Department of Plant and Environmental Sciences, Faculty of Science, University of Copenhagen, Frederiksberg, Denmark.

<sup>3</sup>Department of Entomology, Max Planck Institute for Chemical Ecology, Jena, Germany.

<sup>4</sup>Department of Biochemistry, Max Planck Institute for Chemical Ecology, Jena, Germany

Corresponding author: \*fberan@ice.mpg.de

#### **This file includes:**

Supplementary Figures 1-10

Supplementary Tables 1-9

#### **Additional Supplementary files for this manuscript include the following:**

Supplementary Data 1 (Excel Table)

Supplementary Data 2 (PDF Figure)

22 **Supplementary Figures 1-10**

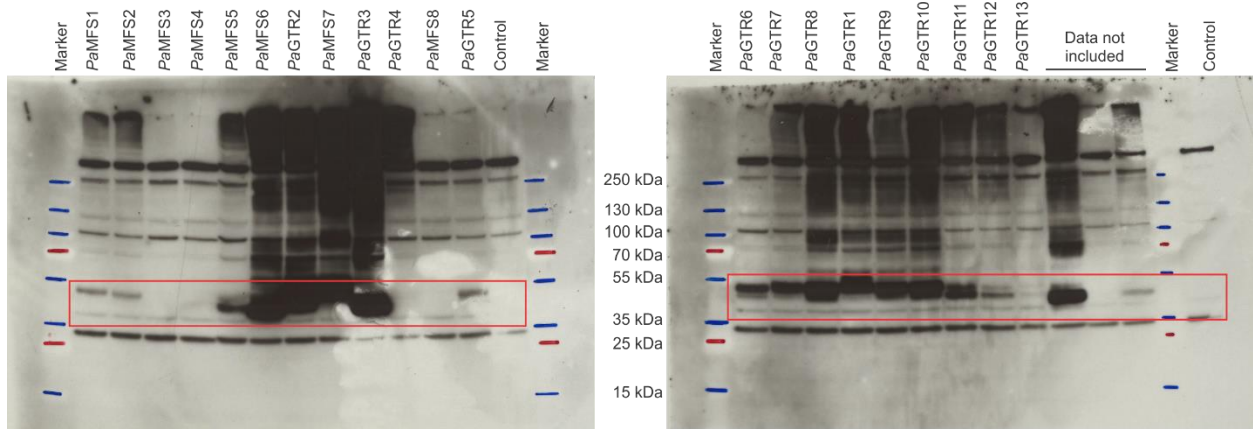

23

24 **Supplementary Figure 1. Detection of recombinant transporters expressed in High Five insect cells**  
25 **by Western blotting.** The region containing bands that correspond to recombinant proteins are framed in  
26 red. Protein marker bands were highlighted with blue and red lines on the film.

27

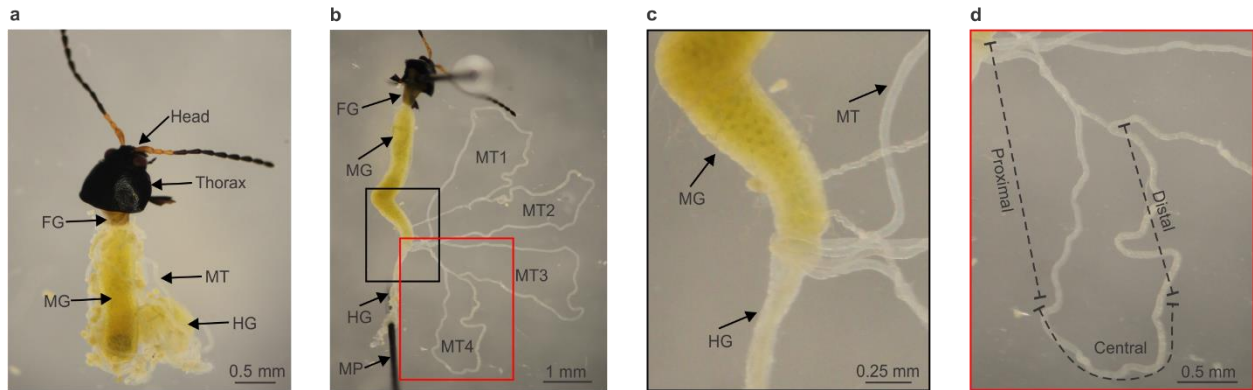

28 **Supplementary Figure 2. Morphology of Malpighian tubules.** a Gut with Malpighian tubules dissected  
29 from a four-day old *P. armoraciae* adult. b Malpighian tubule system consisting of four similar tubules  
30 (MT1-4) that empty at their proximal ends near the midgut-hindgut junction. Two tubules each fuse at  
31 their distal ends and appear to be attached to the midgut. c Magnification of the midgut-hindgut junction  
32 framed in black in panel b. d Magnification of one tubule (MT4) framed in red in panel b. FG, foregut;  
33 MG, midgut; HG, hindgut; MT, Malpighian tubules; MP, metal pin.

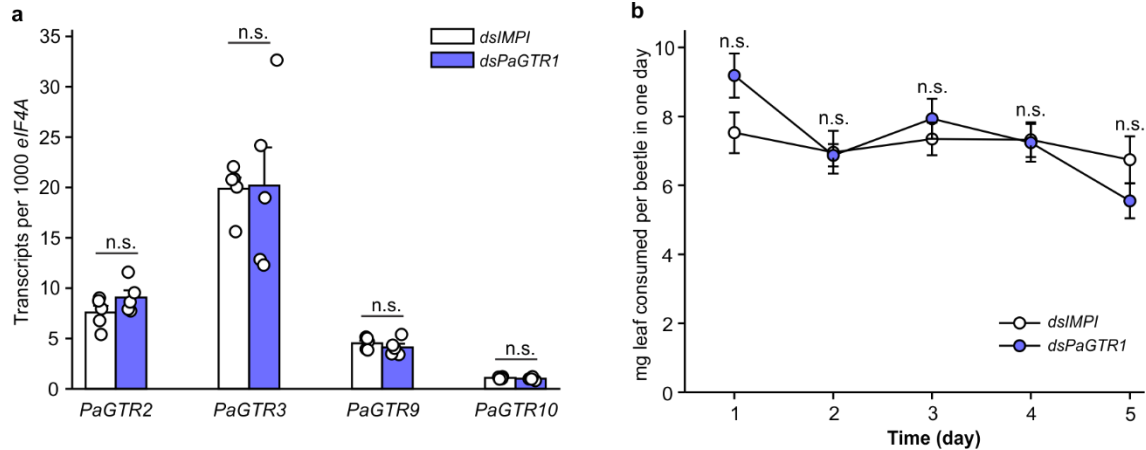

34

35 **Supplementary Figure 3. Analysis of potential off-target effects of *dsPaGTR1*-injection and**  
 36 **comparison of beetle feeding on *Arabidopsis* leaves. a** Four days after dsRNA injection, the gene  
 37 expression of *PaGTR2*, *PaGTR3*, *PaGTR9* and *PaGTR10* was determined by quantitative PCR to assess  
 38 whether there was off-target silencing on other *PaGTRs*. The nucleotide sequence of *PaGTR1* was most  
 39 similar to *PaGTR9* and *PaGTR10* in the *P. armoraciae* transcriptome. Upon heterologously expressed in  
 40 High Five insect cells, *PaGTR2*, *PaGTR3* and *PaGTR9* showed activity towards indol-3-ylmethyl  
 41 glucosinolate ( $n = 5$ ). **b** Four days after dsRNA injection, adults were allowed to feed on *Arabidopsis*  
 42 leaves for five days. Treatments were compared by two-tailed Student's *t*-test or Mann-Whitney *U* test ( $n$   
 43 = 10). Data are shown as mean  $\pm$  s.e.m. n.s., not significantly different.

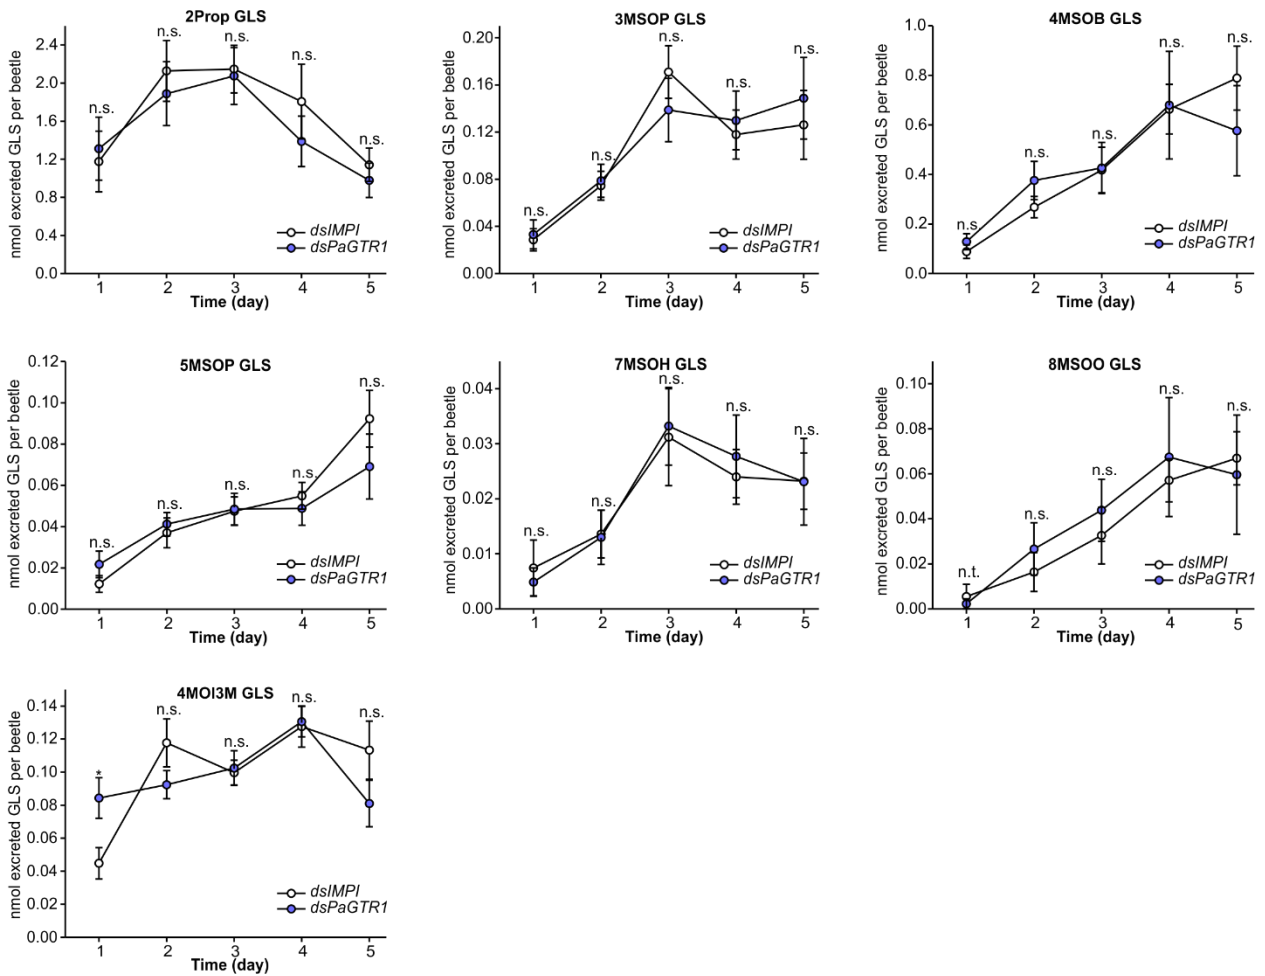

44

45 **Supplementary Figure 4. Time course of glucosinolate excretion during feeding on *Arabidopsis* by**  
 46 **adult *P. armoraciae* after *dsIMPI*- or *dsPaGTR1*-injection.** The excreted glucosinolate amounts on  
 47 each day were compared by two-tailed Student's *t*-test or Mann-Whitney *U* test ( $n = 9$  for day 4,  $n = 10$  for  
 48 other days). Data are shown as mean  $\pm$  s.e.m. n.t., not tested; n.s., not significantly different; \*  $P < 0.05$ ;  
 49 2Prop, 2-propenyl; 3MSOP, 3-methylsulfinylpropyl; 4MSOB, 4-methylsulfinylbutyl; 5MSOP, 5-  
 50 methylsulfinylpentyl; 7MSOH, 7-methylsulfinylheptyl; 4MOI3M, 4-methoxyindol-3-ylmethyl.

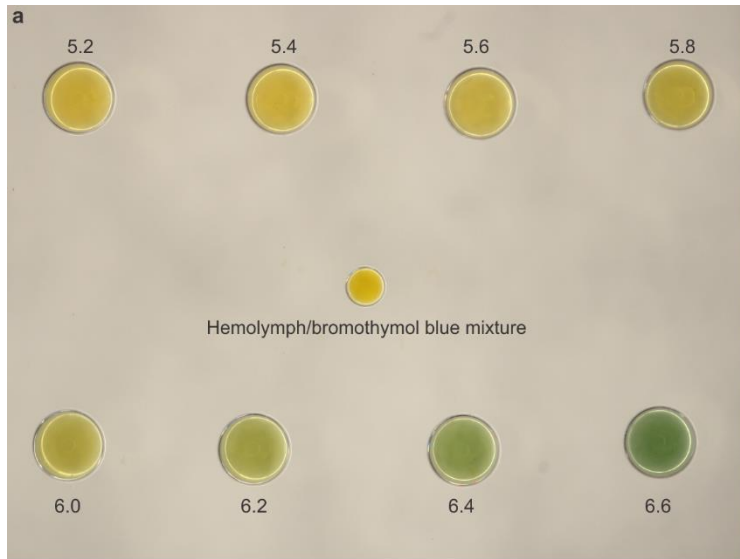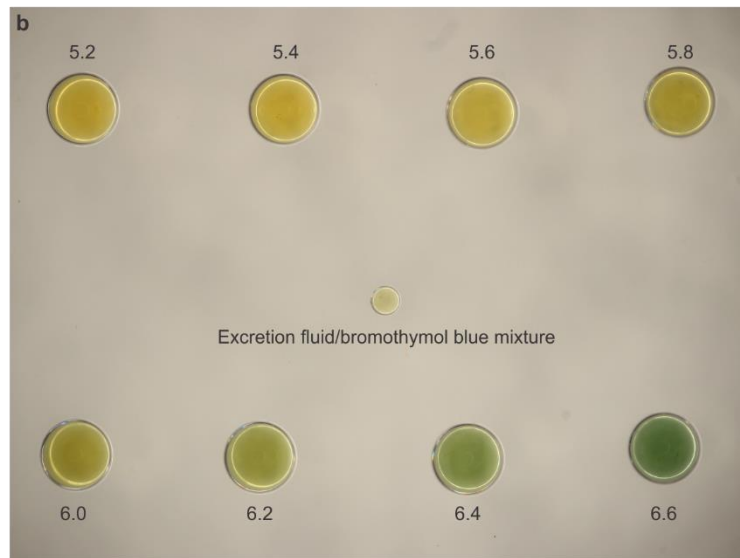

51

52 **Supplementary Figure 5. pH of hemolymph (a) and excretion fluid of isolated Malpighian tubules**  
 53 **(b) of *P. armoraciae* adults.** Hemolymph and excretion fluid were mixed with an equal volume of 0.16%  
 54 (w/v) bromothymol blue. Buffered standard solutions from pH 5.2 to 6.6 containing 0.08% bromothymol  
 55 blue are shown as reference.

56

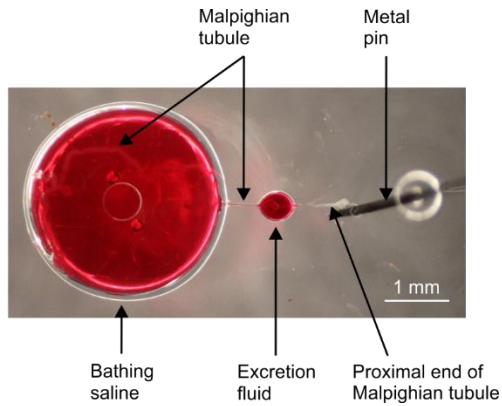

57

58 **Supplementary Figure 6. Preparation of *P. armoraciae* Malpighian tubule for glucoside excretion**  
59 **assay (Ramsay assay).** The dissected Malpighian tubule was placed in a droplet of bathing saline under  
60 water-saturated paraffin-oil, the proximal end was drawn out of the droplet and attached to the Sylgard-  
61 coated petri dish with a metal pin, and cut to allow the collection of excretion fluid. A mixture of eight  
62 different plant glucosides, each at a concentration of 6.7 mM, and 0.1% (w/v) amaranth was added to the  
63 saline. After 2-3 h, the bathing saline, Malpighian tubule and excretion fluid were sampled.

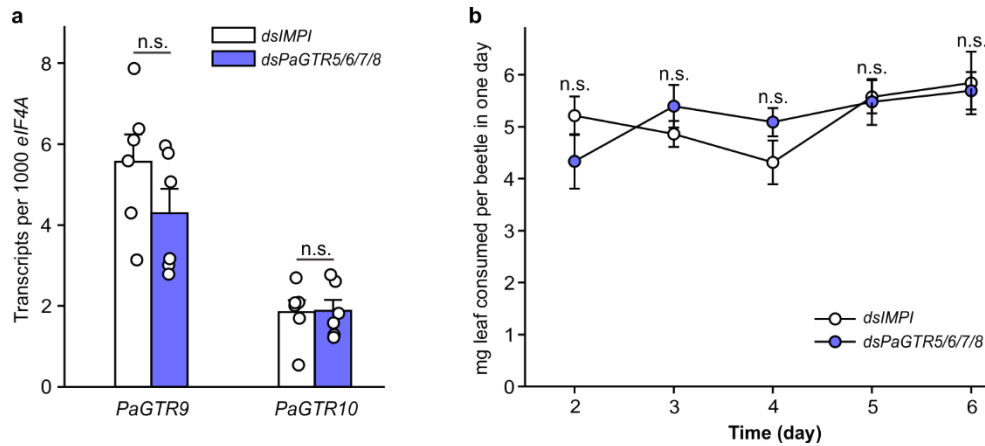

64

65 **Supplementary Figure 7. Analysis of potential off-target effects of *dsPaGTR5/6/7/8*-injection and**  
 66 **comparison of beetle feeding on *Arabidopsis* leaves. a** Six days after dsRNA injection, the gene  
 67 expression of *PaGTR9* and *PaGTR10* was determined by quantitative PCR to assess whether there was  
 68 off-target silencing on other *PaGTRs* ( $n = 6$ ). The nucleotide sequence of *PaGTR5/6/7/8* was most similar  
 69 to *PaGTR9* and *PaGTR10* in the *P. armoraciae* transcriptome. **b** After dsRNA injection, adults were  
 70 allowed to feed on *Arabidopsis* leaves for six days. Feeding amount of each day was recorded from the  
 71 second to the sixth day ( $n = 10$ ). Data are shown as mean  $\pm$  s.e.m. n.s., not significantly different.



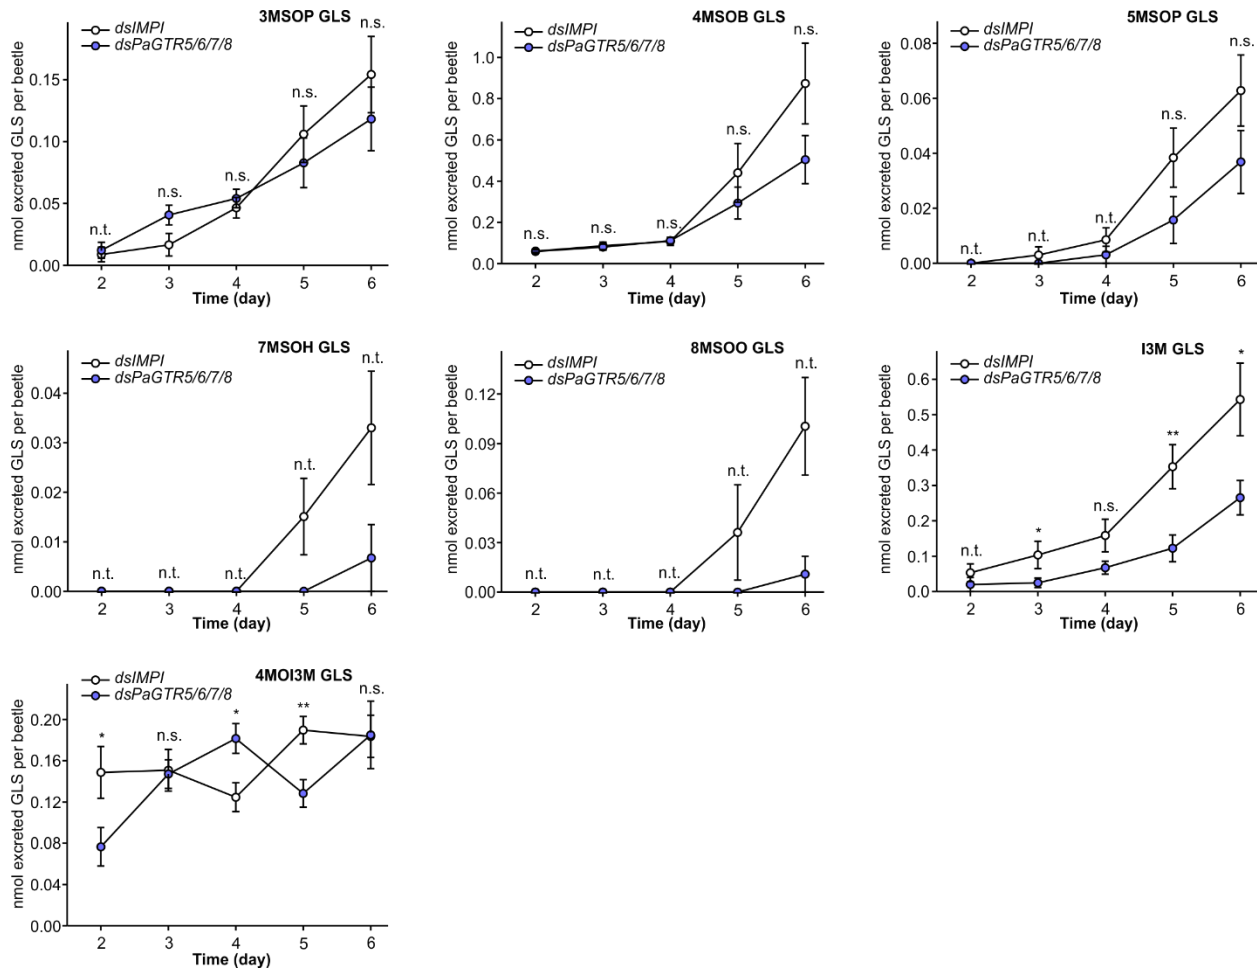

72

73 **Supplementary Figure 8. Time course of glucosinolate excretion during feeding on *Arabidopsis* by**  
 74 **adult *P. armoraciae* after *dsIMPI*- or *dsPaGTR5/6/7/8*-injection.** The excreted glucosinolate amounts  
 75 on each day were compared by two-tailed Student's *t*-test or Mann-Whitney *U* test ( $n = 10$ ). Data are  
 76 shown as mean  $\pm$  s.e.m. n.t., not tested; n.s., not significantly different; \* $P < 0.05$ ; \*\* $P < 0.01$ ; I3M,  
 77 indol-3-ylmethyl.

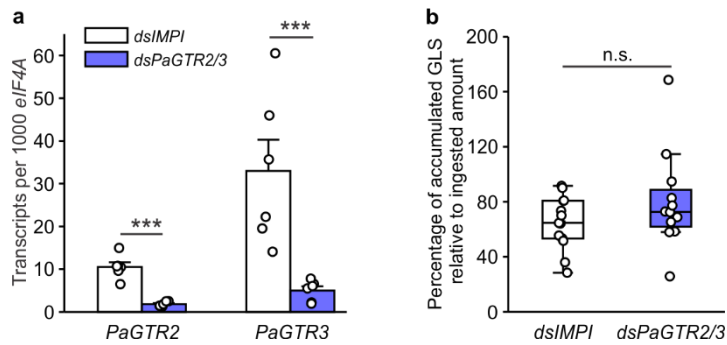

78

79 **Supplementary Figure 9. Accumulation of ingested glucosinolates in adult *P. armoraciae* beetles**

80 **after knock-down of *PaGTR2* and *PaGTR3* expression.** **a** *PaGTR2* and *PaGTR3* expression determined

81 by quantitative PCR in adult *P. armoraciae* after injection of dsRNA targeting *PaGTR2* and *PaGTR3*

82 (*dsPaGTR2/3*) or *IMPI* as a control ( $n = 6$ ). Data are shown as mean  $\pm$  s.e.m. **b** Accumulation of the

83 ingested glucosinolates in adult *P. armoraciae*. Three days after dsRNA-injection, adults were fed for one

84 day with *Arabidopsis* leaves, starved for one day, and collected for glucosinolate extraction. Accumulated

85 glucosinolates: sum of 3-methylsulfinylpropyl GLS, 3-methylthiopropyl GLS, 4-methylsulfinylbutyl GLS,

86 4-methylthiobutyl GLS, 7-methylsulfinylheptyl GLS and 8-methylsulfinyloctyl GLS. Due to a high

87 background of indolic GLS, it was not possible to quantify the accumulation of ingested indolic GLS

88 from *Arabidopsis*. Box plots show the median, interquartile range, and outliers of each data set ( $n = 13$  for

89 the *dsIMPI*-injected beetles,  $n = 12$  for the *dsPaGTR2/3*-injected beetles). Treatments were compared by

90 two-tailed Student's *t*-test. n.s., not significantly different; \*\*\* $P < 0.001$ .

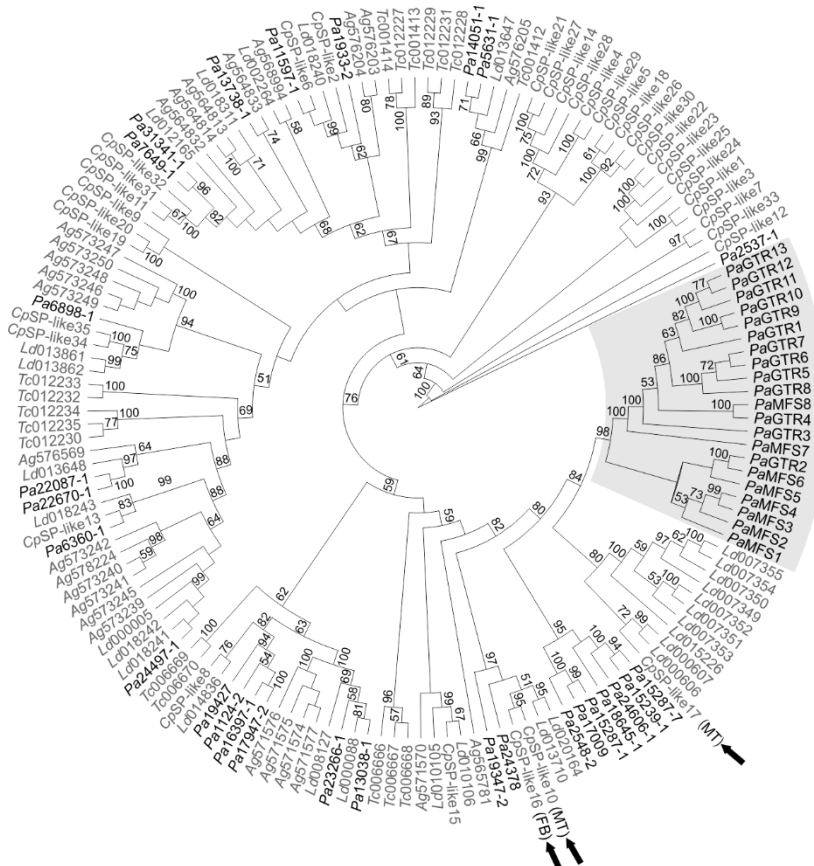

91

92 **Supplementary Figure 10. Diversification of coleopteran sugar porters.** Maximum-likelihood inferred  
 93 phylogeny of a subset of predicted coleopteran sugar porters (Transporter Classification Database ID  
 94 2.A.1.1) identified in the *P. armoraciae* transcriptome (written in black) and the genomes of *Leptinotarsa*  
 95 *decemlineata*, *Anoplophora glabripennis*, and *Tribolium castaneum* (marked with a black frame in  
 96 Supplementary Data 2), and 35 sugar porters identified in the proteome of *Chrysomela populi* (written in  
 97 grey). The *P. armoraciae*-specific clade investigated in this study is highlighted with a grey background.  
 98 Tissue-specific localization of three sugar porters from *C. populi* that are closely related to *PaGTRs* is  
 99 written in parentheses. MT, Malpighian tubules; FB, fat body. Bootstrap support values higher than 50%  
 100 are indicated on the corresponding branches. The tree was rooted with a putative vesicular  
 101 neurotransmitter transporter (Transporter Classification Database ID 2.A.1.14) from *P. armoraciae*  
 102 (*Pa2537-1*).

103 **Supplementary Tables 1-9**

104 **Supplementary Table 1.** Numbers of putative transporters in *Phyllotreta armoraciae*  
 105 transcriptome predicted by the Transporter Automatic Annotation Pipeline (TransAAP).

| <b>Transporter family</b>                                                                                      | <b>Transporter number</b> |
|----------------------------------------------------------------------------------------------------------------|---------------------------|
| The Major Facilitator Superfamily (MFS)                                                                        | 353                       |
| The ATP-binding Cassette (ABC) Superfamily                                                                     | 174                       |
| The H <sup>+</sup> - or Na <sup>+</sup> -translocating F-type, V-type and A-type ATPase (F-ATPase) Superfamily | 93                        |
| The Voltage-gated Ion Channel (VIC) Superfamily                                                                | 71                        |
| The Mitochondrial Carrier (MC) Family                                                                          | 69                        |
| The Neurotransmitter Receptor, Cys loop, Ligand-gated Ion Channel (LIC) Family                                 | 39                        |
| The P-type ATPase (P-ATPase) Superfamily                                                                       | 38                        |
| The HlyC/CorC (HCC) Family                                                                                     | 33                        |
| The Epithelial Na <sup>+</sup> Channel (ENaC) Family                                                           | 29                        |
| The Drug/Metabolite Transporter (DMT) Superfamily                                                              | 26                        |
| The Major Intrinsic Protein (MIP) Family                                                                       | 26                        |
| The Transient Receptor Potential Ca <sup>2+</sup> Channel (TRP-CC) Family                                      | 23                        |
| The Amino Acid/Auxin Permease (AAAP) Family                                                                    | 22                        |
| The Glutamate-gated Ion Channel (GIC) Family of Neurotransmitter Receptors                                     | 22                        |
| The Neurotransmitter:Sodium Symporter (NSS) Family                                                             | 21                        |
| The Amino Acid-Polyamine-Organocation (APC) Family                                                             | 18                        |
| The Equilibrative Nucleoside Transporter (ENT) Family                                                          | 18                        |
| The Mitochondrial Protein Translocase (MPT) Family                                                             | 17                        |
| The Ca <sup>2+</sup> :Cation Antiporter (CaCA) Family                                                          | 14                        |
| The Sulfate Permease (SulP) Family                                                                             | 14                        |
| The Ferrous Iron Uptake (FeoB) Family                                                                          | 12                        |
| The Resistance-Nodulation-Cell Division (RND) Superfamily                                                      | 12                        |
| The YhaG Putative Tryptophan Uptake Permease (YhaG) family                                                     | 12                        |
| The Unknown BART Superfamily-1 (UBS1) Family                                                                   | 11                        |

|                                                                                                   |    |
|---------------------------------------------------------------------------------------------------|----|
| The Solute:Sodium Symporter (SSS) Family                                                          | 10 |
| The Zinc (Zn <sup>2+</sup> )-Iron (Fe <sup>2+</sup> ) Permease (ZIP) Family                       | 10 |
| The Choline Transporter Like (CTL) Family                                                         | 9  |
| The MerTP Mercuric Ion (Hg <sup>2+</sup> ) Permease (MerTP) Family                                | 9  |
| The Multidrug/Oligosaccharidyl-lipid/Polysaccharide (MOP) Flippase Superfamily                    | 9  |
| The Chloride Carrier/Channel (ClC) Family                                                         | 8  |
| The Glycoside-Pentoside-Hexuronide (GPH):Cation Symporter Family                                  | 8  |
| The Gap Junction-forming Innexin (Innexin) Family                                                 | 8  |
| The Annexin (Annexin) Family                                                                      | 7  |
| The Cation-Chloride Cotransporter (CCC) Family                                                    | 7  |
| The Cation Diffusion Facilitator (CDF) Family                                                     | 7  |
| The Divalent Anion:Na <sup>+</sup> Symporter (DASS) Family                                        | 7  |
| The Organo Anion Transporter (OAT) Family                                                         | 7  |
| The Polycystin Cation Channel (PCC) Family                                                        | 6  |
| The Proton-dependent Oligopeptide Transporter (POT) Family                                        | 6  |
| The Twin Arginine Targeting (Tat) Family                                                          | 6  |
| The Arsenite-Antimonite (ArsAB) Efflux Family                                                     | 5  |
| The Inward Rectifier K <sup>+</sup> Channel (IRK-C) Family                                        | 5  |
| The Ammonia Transporter Channel (Amt) Family                                                      | 4  |
| The Intracellular Chloride Channel (CLIC) Family                                                  | 4  |
| The Dicarboxylate/Amino Acid:Cation (Na <sup>+</sup> or H <sup>+</sup> ) Symporter (DAACS) Family | 4  |
| The Mg <sup>2+</sup> Transporter-E (MgtE) Family                                                  | 4  |
| The Cytochrome Oxidase Biogenesis (Oxa1) Family                                                   | 4  |
| The Inorganic Phosphate Transporter (PiT) Family                                                  | 4  |
| The Anion Exchanger (AE) Family                                                                   | 3  |
| The Arsenite-Antimonite (ArsB) Efflux Family                                                      | 3  |
| The ATP Exporter (ATP-E) Family                                                                   | 3  |
| The Monovalent Cation:Proton Antiporter-1 (CPA1) Family                                           | 3  |
| The Ca <sup>2+</sup> Release-activated Ca <sup>2+</sup> (CRAC) Channel (CRAC-C) Family            | 3  |
| The Double Stranded RNA Transporter (dsRNA-T) Family                                              | 3  |

|                                                                                                                                             |   |
|---------------------------------------------------------------------------------------------------------------------------------------------|---|
| The H <sup>+</sup> -translocating Pyrophosphatase (H <sup>+</sup> -PPase) Family                                                            | 3 |
| The Iron/Lead Transporter (ILT) Superfamily                                                                                                 | 3 |
| The Mitochondrial Tricarboxylate Carrier (MTC) Family                                                                                       | 3 |
| The Metal Ion (Mn <sup>2+</sup> -iron) Transporter (Nramp) Family                                                                           | 3 |
| The Presenilin ER Ca <sup>2+</sup> Leak Channel (Presenilin) Family                                                                         | 3 |
| The ATP:ADP Antiporter (AAA) Family                                                                                                         | 2 |
| The Anion Channel-forming Bestrophin (Bestrophin) Family                                                                                    | 2 |
| The Monovalent Cation:Proton Antiporter-2 (CPA2) Family                                                                                     | 2 |
| The Copper Transporter (Ctr) Family                                                                                                         | 2 |
| The Type II (General) Secretory Pathway (IISP) Family                                                                                       | 2 |
| The Lysosomal Cystine Transporter (LCT) Family                                                                                              | 2 |
| The Branched Chain Amino Acid:Cation Symporter (LIVCS) Family                                                                               | 2 |
| The CorA Metal Ion Transporter (MIT) Family                                                                                                 | 2 |
| The Oligopeptide Transporter (OPT) Family                                                                                                   | 2 |
| The 2-Hydroxycarboxylate Transporter (2-HCT) Family                                                                                         | 1 |
| The Auxin Efflux Carrier (AEC) Family                                                                                                       | 1 |
| The Bile Acid:Na <sup>+</sup> Symporter (BASS) Family                                                                                       | 1 |
| The Betaine/Carnitine/Choline Transporter (BCCT) Family                                                                                     | 1 |
| The Chloroplast Envelope Protein Translocase (CEPT or Tic-Toc) Family                                                                       | 1 |
| The Concentrative Nucleoside Transporter (CNT) Family                                                                                       | 1 |
| The C <sub>4</sub> -Dicarboxylate Uptake (Dcu) Family                                                                                       | 1 |
| The C <sub>4</sub> -dicarboxylate Uptake C (DcuC) Family                                                                                    | 1 |
| The Epithelial Chloride Channel (E-CIC) Family                                                                                              | 1 |
| The Glutamate:Na <sup>+</sup> Symporter (ESS) Family                                                                                        | 1 |
| The PTS Glucitol (Gut) Family                                                                                                               | 1 |
| The Nucleotide-sensitive Anion-selective Channel, ICln (ICln) Family                                                                        | 1 |
| The Magnesium Transporter1 (MagT1) Family                                                                                                   | 1 |
| The 4 TMS Multidrug Endosomal Transporter (MET) Family                                                                                      | 1 |
| The H <sup>+</sup> - or Na <sup>+</sup> -translocating Bacterial Flagellar Motor 1ExbBD Outer Membrane Transport Energizer (Mot/Exb) Family | 1 |
| The Mitochondrial and Plastid Porin (MPP) Family                                                                                            | 1 |

|                                                                 |   |
|-----------------------------------------------------------------|---|
| The Malonate:Na <sup>+</sup> Symporter (MSS) Family             | 1 |
| The NIPA Mg <sup>2+</sup> Uptake Permease (NIPA) Family         | 1 |
| The Non-selective Cation Channel-2 (NSCC2) Family               | 1 |
| The OmpA-OmpF Porin (OOP) Family                                | 1 |
| The Reduced Folate Carrier (RFC) Family                         | 1 |
| The Tellurite-resistance/Dicarboxylate Transporter (TDT) Family | 1 |
| The Homotrimeric Cation Channel (TRIC) Family                   | 1 |
| The Anion Channel Tweety (Tweety) Family                        | 1 |
| The Urea Transporter (UT) Family                                | 1 |

---

106 **Supplementary Table 2.** Glucosinolate concentrations in the hemolymph of seven-day old adult *P. armoraciae*.

| Glucosinolate | Glucosinolate concentration (mM) |             |             |             |             |             | Mean $\pm$ SD       |
|---------------|----------------------------------|-------------|-------------|-------------|-------------|-------------|---------------------|
|               | Replicate 1                      | Replicate 2 | Replicate 3 | Replicate 4 | Replicate 5 | Replicate 6 |                     |
| 2Prop GLS     | 55.769                           | 59.682      | 97.330      | 67.331      | 67.277      | 80.198      | 71.265 $\pm$ 15.263 |
| 3But GLS      | 1.081                            | 4.937       | 3.670       | 3.791       | 3.725       | 2.373       | 3.263 $\pm$ 1.343   |
| 2PE GLS       | 0.157                            | 0.302       | 0.938       | 0.704       | 0.280       | 0.342       | 0.454 $\pm$ 0.300   |
| Benzyl GLS    | 0.345                            | 0.386       | 0.634       | 0.735       | 0.401       | 0.258       | 0.460 $\pm$ 0.184   |
| I3M GLS       | 1.948                            | 1.811       | 3.118       | 2.626       | 1.289       | 1.702       | 2.082 $\pm$ 0.668   |
| Total         | 59.300                           | 67.118      | 105.689     | 75.187      | 72.972      | 84.873      | 77.523 $\pm$ 16.210 |

107



108 **Supplementary Table 3.** Glucosinolate levels in *PaGTRI*-silenced and control beetles.

| Glucosinolate | nmol sequestered glucosinolate per adult (mean $\pm$ SD; $n = 10$ ) |                    | Statistical method <sup>1</sup>     | Statistics        | <i>P</i> value |
|---------------|---------------------------------------------------------------------|--------------------|-------------------------------------|-------------------|----------------|
|               | <i>dsIMPI</i>                                                       | <i>dsPaGTRI</i>    |                                     |                   |                |
| 3MSOP GLS     | 1.231 $\pm$ 0.195                                                   | 1.394 $\pm$ 0.282  | Two-tailed Student's <i>t</i> -test | <i>t</i> = -1.507 | 0.149          |
| 3MTP GLS      | 0.188 $\pm$ 0.051                                                   | 0.232 $\pm$ 0.088  | Two-tailed Student's <i>t</i> -test | <i>t</i> = -1.343 | 0.196          |
| 4MSOB GLS     | 3.487 $\pm$ 0.491                                                   | 4.087 $\pm$ 1.096  | Two-tailed Student's <i>t</i> -test | <i>t</i> = -1.581 | 0.131          |
| 4MTB GLS      | 10.256 $\pm$ 2.100                                                  | 11.200 $\pm$ 3.071 | Two-tailed Student's <i>t</i> -test | <i>t</i> = -0.803 | 0.433          |
| 5MSOP GLS     | 0.191 $\pm$ 0.046                                                   | 0.222 $\pm$ 0.032  | Two-tailed Student's <i>t</i> -test | <i>t</i> = -1.753 | 0.097          |
| 7MSOH GLS     | 0.119 $\pm$ 0.032                                                   | 0.158 $\pm$ 0.030  | Two-tailed Student's <i>t</i> -test | <i>t</i> = -2.830 | 0.011          |
| 8MSOO GLS     | 1.135 $\pm$ 0.286                                                   | 1.306 $\pm$ 0.441  | Two-tailed Student's <i>t</i> -test | <i>t</i> = -1.028 | 0.317          |
| 2Prop GLS     | 55.841 $\pm$ 7.800                                                  | 52.509 $\pm$ 3.984 | Mann-Whitney <i>U</i> test          | <i>U</i> = 38.000 | 0.385          |
| 3-butenyl GLS | 0.935 $\pm$ 0.161                                                   | 1.007 $\pm$ 0.295  | Two-tailed Student's <i>t</i> -test | <i>t</i> = -0.683 | 0.503          |
| I3M GLS       | 2.830 $\pm$ 0.467                                                   | 0.889 $\pm$ 0.303  | Two-tailed Student's <i>t</i> -test | <i>t</i> = 10.975 | < 0.001        |
| 4OHI3M GLS    | 0.002 $\pm$ 0.004                                                   | 0.002 $\pm$ 0.002  | Mann-Whitney <i>U</i> test          | <i>U</i> = 50.000 | 1              |
| 4MOI3M GLS    | 0.159 $\pm$ 0.084                                                   | 0.227 $\pm$ 0.095  | Two-tailed Student's <i>t</i> -test | <i>t</i> = -1.687 | 0.109          |
| 1MOI3M GLS    | 0.026 $\pm$ 0.008                                                   | 0.004 $\pm$ 0.002  | Mann-Whitney <i>U</i> test          | <i>U</i> = 0.000  | < 0.001        |
| Total         | 76.399 $\pm$ 8.738                                                  | 73.248 $\pm$ 4.350 | Two-tailed Student's <i>t</i> -test | <i>t</i> = 1.021  | 0.321          |

109 <sup>1</sup>Analyses were performed using SigmaPlot 14.0.

110 **Supplementary Table 4.** Glucosinolate levels in *PaGTR5/6/7/8*-silenced and control beetles.

| Glucosinolate | nmol sequestered glucosinolate per adult (mean $\pm$ SD; $n = 10$ ) |                       | Transformation    | Statistics <sup>1</sup> | P value |
|---------------|---------------------------------------------------------------------|-----------------------|-------------------|-------------------------|---------|
|               | <i>dsIMPI</i>                                                       | <i>dsPaGTR5/6/7/8</i> |                   |                         |         |
| 3MSOP GLS     | 1.859 $\pm$ 0.217                                                   | 1.713 $\pm$ 0.251     | -                 | $t = 1.388$             | 0.182   |
| 3MTP GLS      | 0.432 $\pm$ 0.098                                                   | 0.318 $\pm$ 0.087     | -                 | $t = 2.739$             | 0.013   |
| 4MSOB GLS     | 4.555 $\pm$ 0.802                                                   | 4.582 $\pm$ 0.855     | -                 | $t = -0.073$            | 0.943   |
| 4MTB GLS      | 14.793 $\pm$ 1.872                                                  | 12.287 $\pm$ 2.012    | -                 | $t = 2.882$             | 0.010   |
| 5MSOP GLS     | 0.295 $\pm$ 0.048                                                   | 0.315 $\pm$ 0.077     | Square-root       | $t = -0.648$            | 0.525   |
| 7MSOH GLS     | 0.218 $\pm$ 0.026                                                   | 0.220 $\pm$ 0.045     | -                 | $t = -0.139$            | 0.891   |
| 8MSOO GLS     | 1.317 $\pm$ 0.195                                                   | 1.281 $\pm$ 0.376     | -                 | $t = 0.263$             | 0.795   |
| 2Prop GLS     | 54.667 $\pm$ 5.272                                                  | 47.919 $\pm$ 5.412    | -                 | $t = 2.825$             | 0.011   |
| 3-butenyl GLS | 1.287 $\pm$ 0.360                                                   | 1.456 $\pm$ 0.584     | Log <sub>10</sub> | $t = -0.791$            | 0.439   |
| I3M GLS       | 4.227 $\pm$ 0.487                                                   | 5.225 $\pm$ 0.907     | -                 | $t = -3.069$            | 0.007   |
| 4MOI3M GLS    | 0.301 $\pm$ 0.140                                                   | 0.440 $\pm$ 0.173     | -                 | $t = -1.977$            | 0.064   |
| 1MOI3M GLS    | 0.070 $\pm$ 0.010                                                   | 0.070 $\pm$ 0.017     | -                 | $t = -0.010$            | 0.992   |
| Total         | 84.021 $\pm$ 5.319                                                  | 75.828 $\pm$ 4.321    | -                 | $t = 3.781$             | 0.001   |

111 <sup>1</sup>Analyses were performed with two-tailed Student's *t*-test using SigmaPlot 14.0.

112 **Supplementary Table 5.** Primers used in this study.

| <b>Gene</b>   | <b>Primer name</b> | <b>Primer sequence 5' - 3'</b>                                         | <b>Use</b>                                                                                                                                       |
|---------------|--------------------|------------------------------------------------------------------------|--------------------------------------------------------------------------------------------------------------------------------------------------|
| <i>PaGTR1</i> | PaMFS28-CL1        | GTAAGTTTAAAGTGTTATCTTCAAATTATCAA<br>GGT                                | Cloning in pCR4-TOPO vector for sequencing; fwd                                                                                                  |
|               | PaMFS28-CL2        | CGATGAATGTGACGGAAGCA                                                   | Cloning in pCR4-TOPO vector for sequencing; rev                                                                                                  |
|               | PaMFS28-SEQ1       | ACAGAGGGAAATTCGGTTGT                                                   | Internal sequencing                                                                                                                              |
|               | PaMFS28-SEQ2       | GCAGTTTCTGGTTCCGTTGT                                                   | Internal sequencing                                                                                                                              |
|               | PaMFS28-IEX4-1     | ACGCGTCGACATGAACAATTGGACAAAAGA<br>ACATTTT                              | Expression of gene without stop codon in pIEx-4<br>vector; fwd                                                                                   |
|               | PaMFS28-IEX4-2     | ATAAGAATGCGGCCGCGCCTTTTAATATCG<br>CCTGAATTTT                           | Expression of gene without stop codon in pIEx-4<br>vector; rev                                                                                   |
|               | PaMFS28-QPF1       | AGTTTCTGGTTCCGTTGTGC                                                   | qPCR; fwd                                                                                                                                        |
|               | PaMFS28-QPR1       | GGTTGCCCAATGATTCGGAT                                                   | qPCR; rev                                                                                                                                        |
|               | PaMFS28-NB1u-F1    | GGCTTAAUATGAACAATTGGACAAAAGAAC<br>ATTTT                                | Cloning in pNB1u vector for protein expression in<br><i>Xenopus</i> oocytes; fwd                                                                 |
|               | PaMFS28-NB1u-R1    | GGTTTAAUTTAAGCGTAATCTGGAACATCG<br>TATGGGTAGCCTTTTAATATCGCCTGAATTT<br>C | Cloning in pNB1u vector for protein expression in<br><i>Xenopus</i> oocytes; rev                                                                 |
|               | T7-PaMFS28-F2      | TAATACGACTCACTATAGGGAGAGGTTTCG<br>TTATTGGTCCATATTTTCAGT                | Amplification of DNA templates for dsRNA<br>synthesis; fwd                                                                                       |
|               | T7-PaMFS28-R2      | TAATACGACTCACTATAGGGAGAGCATTTCG<br>TCTTCTTTGCCCTTTT                    | Amplification of DNA templates for dsRNA<br>synthesis; rev (141-bp amplified fragment of<br><i>PaGTR1</i> using the forward and reverse primers) |
|               | <i>PaGTR2</i>      | c6623-1-CL1                                                            | GCAGAAAGTGTCCGACAAATG                                                                                                                            |
| c6623-1-CL2   |                    | CATAACAACAATGTACAACCTGTCGAG                                            | Cloning in pCR4-TOPO vector for sequencing; rev                                                                                                  |
| c6623-1-EX1   |                    | TGTCGACATGGTCAAAAAACGATACGAAAT<br>C                                    | Expression of gene without stop codon in pIEx-4<br>vector; fwd                                                                                   |
| c6623-1-EX2   |                    | TGCGGCCGCATACTCTTTCAAATCTTTTGT<br>ATTTCAAT                             | Expression of gene without stop codon in pIEx-4<br>vector; rev                                                                                   |
| c6623-1-S1    |                    | ACTTTCACGCAACCCACAAT                                                   | Internal sequencing                                                                                                                              |
| c6623-1-S2    |                    | GATTGGTGTGTTGCCACGTT                                                   | Internal sequencing                                                                                                                              |
| c6623-1-S3    |                    | CAGCTTCGGCTATCCTTTGT                                                   | Internal sequencing                                                                                                                              |
| C6623-1-QPF2  |                    | GCCTGCGATACAACAACCTGA                                                  | qPCR; fwd                                                                                                                                        |

|               |                      |                                                       |                                                                                                                                            |
|---------------|----------------------|-------------------------------------------------------|--------------------------------------------------------------------------------------------------------------------------------------------|
|               | C6623-1-QPR2         | TCAAAGGAAGAGACCCGAGA                                  | qPCR; rev                                                                                                                                  |
|               | T7-c6623-1-F1        | TAATACGACTCACTATAGGGAGAGGAAGCG                        | Amplification of DNA templates for dsRNA synthesis; fwd                                                                                    |
|               | T7-c6623-1-R1        | TAATACGACTCACTATAGGGAGAGCTAGAA<br>GCAGCAGGGACAT       | Amplification of DNA templates for dsRNA synthesis; rev (298-bp amplified fragment of <i>PaGTR2</i> using the forward and reverse primers) |
| <i>PaGTR3</i> | PaMFS27-CL1          | ACGGAATCTATGAATGATGTGCT                               | Cloning in pCR4-TOPO vector for sequencing; fwd                                                                                            |
|               | PaMFS27-CL2          | AACCACCTGCATTTTCGGAAC                                 | Cloning in pCR4-TOPO vector for sequencing; rev                                                                                            |
|               | PaMFS27-SEQ1         | AGCATCCTCTACATGACCCTG                                 | Internal sequencing                                                                                                                        |
|               | PaMFS27-SEQ2         | CTCGGTGGTGACGTCCAT                                    | Internal sequencing                                                                                                                        |
|               | PaMFS27-SEQ3         | GGGATTTCTACTCATGGTGATCT                               | Internal sequencing                                                                                                                        |
|               | PaMFS27-IEX4-1       | ACGCGTCGACATGAAGGACGAGATATCTCT<br>GAAG                | Expression of gene without stop codon in pIEx-4 vector; fwd                                                                                |
|               | PaMFS27-IEX4-2       | ATAAGAATGCGGCCGCATAACTCTTGAGCT<br>CCGCCT              | Expression of gene without stop codon in pIEx-4 vector; rev                                                                                |
|               | PaMFS27-QPF1         | CGCGTTGTTATTGGGATGCT                                  | qPCR; fwd                                                                                                                                  |
|               | PaMFS27-QPR1         | GCTTGTGTTTGGTTCGA                                     | qPCR; rev                                                                                                                                  |
|               | T7-PaMFS27-F2        | TAATACGACTCACTATAGGGAGATATCCTC<br>CACAGCCACAGGAAT     | Amplification of DNA templates for dsRNA synthesis; fwd                                                                                    |
|               | T7-PaMFS27-R2        | TAATACGACTCACTATAGGGAGAGAACAGC<br>TCGGTGACCAGCA       | Amplification of DNA templates for dsRNA synthesis; rev (182-bp amplified fragment of <i>PaGTR3</i> using the forward and reverse primers) |
| <i>PaGTR4</i> | PaMFS43-CL1          | TACCGTCTGCCTCATACTCG                                  | Cloning in pCR4-TOPO vector for sequencing; fwd                                                                                            |
|               | PaMFS43-CL2          | TGCCTGACTAGTCTACACCA                                  | Cloning in pCR4-TOPO vector for sequencing; rev                                                                                            |
|               | PaMFS43-SEQ1         | TGAGCGTTGTACCTGTATACAT                                | Internal sequencing                                                                                                                        |
|               | PaMFS43-IEX4-1       | ACGCGTCGACATGAAGGTAACAAGATG<br>AAGATTACC              | Expression of gene without stop codon in pIEx-4 vector; fwd                                                                                |
|               | PaMFS43-IEX4-2       | ATAAGAATGCGGCCGCTCTTTTAAGTAATTT<br>TTCTATTTCACTGTAATT | Expression of gene without stop codon in pIEx-4 vector; rev                                                                                |
|               | PaMFS43-QPF2         | GTTACACGGGAATGCTGCAT                                  | qPCR; fwd                                                                                                                                  |
| PaMFS43-QPR2  | CGGGCATCAAAGGAAACACA | qPCR; rev                                             |                                                                                                                                            |
| <i>PaGTR5</i> | PaMFS15_3R_a         | TACGCAGCTGAAGTTAGCGAGGATCACA                          | 3' RACE                                                                                                                                    |
|               | PaMFS15_3R_b         | AGCACCGTTTTTAGACCAAGCAGGCACT                          | 3' RACE                                                                                                                                    |

|               |                |                                                        |                                                                                                                                                  |
|---------------|----------------|--------------------------------------------------------|--------------------------------------------------------------------------------------------------------------------------------------------------|
|               | PaMFS15-5R     | TATAGCGGTACCAGTGGAAGATATAACAAG<br>CA                   | 5' RACE                                                                                                                                          |
|               | PaMFS15-CL1    | GTAAAAGGTGCGACAAAAGTGT                                 | Cloning in pCR4-TOPO vector for sequencing; fwd                                                                                                  |
|               | PaMFS15-CL2    | TACTGCACATTATTAATAATTGACAATT                           | Cloning in pCR4-TOPO vector for sequencing; rev                                                                                                  |
|               | PaMFS15-SEQ1   | TTCCCGGAGCTTGGATAGTT                                   | Internal sequencing                                                                                                                              |
|               | PaMFS15-IEX4-1 | ACGCGTCGACATGGATAACAAAAAATATGA<br>GAATATTCAAAAAG       | Expression of gene without stop codon in pIEx-4<br>vector; fwd                                                                                   |
|               | PaMFS15-IEX4-2 | ATAAGAATGCGGCCGCTTTTTTCGCATAATT<br>TCTCAATATTTCT       | Expression of gene without stop codon in pIEx-4<br>vector; rev                                                                                   |
|               | PaMFS15-QPF1   | GGTTTAGGTCCTATTCCTACTAGCT                              | qPCR; fwd                                                                                                                                        |
|               | PaMFS15-QPR1   | GTTACCCAAAGATTCCGACACTAG                               | qPCR; rev                                                                                                                                        |
|               | T7-PaMFS15-F6  | TAATACGACTCACTATAGGGGAGAACAGTTT<br>GCTGCTTTGGATCC      | Amplification of DNA templates for dsRNA<br>synthesis; fwd                                                                                       |
|               | T7-PaMFS15-R6  | TAATACGACTCACTATAGGGGAGATACCCAA<br>AGATTCCGACACTAGG    | Amplification of DNA templates for dsRNA<br>synthesis; rev (169-bp amplified fragment of<br><i>PaGTR5</i> using the forward and reverse primers) |
| <i>PaGTR6</i> | PaMFS41_5R_a   | AGTCACCGCTCTGAGCTCTGGTAATGGT                           | 5' RACE                                                                                                                                          |
|               | PaMFS41_5R_b   | ACGCCTGAAAGCAGCATTACAAGCCCTGA                          | 5' RACE                                                                                                                                          |
|               | PaMFS41-CL1    | CGTCTAAATCAAGTGAAATTGTATCGAAT                          | Cloning in pCR4-TOPO vector for sequencing; fwd                                                                                                  |
|               | PaMFS41-CL2    | GTGAGGGTCAATTTGTAATATAAATCGT                           | Cloning in pCR4-TOPO vector for sequencing; rev                                                                                                  |
|               | PaMFS41-SEQ1   | CAATAGAGGAAAATTCGGTTGTTATTTT                           | Internal sequencing                                                                                                                              |
|               | PaMFS41-IEX4-1 | ACGCGTCGACATGGATAACCAAATGAGAA<br>TAATCAAAA             | Expression of gene without stop codon in pIEx-4<br>vector; fwd                                                                                   |
|               | PaMFS41-IEX4-2 | ATAAGAATGCGGCCGCAATATTCTTCGAGA<br>CATCATAGTTTTTCA      | Expression of gene without stop codon in pIEx-4<br>vector; rev                                                                                   |
|               | PaMFS41-QPF3   | TCCAACAAATTGGGCATCTAT                                  | qPCR; fwd                                                                                                                                        |
|               | PaMFS41-QPR3   | AACGAATACCAACAAAGGAGAAGT                               | qPCR; rev                                                                                                                                        |
|               | T7-PaMFS41-F1  | TAATACGACTCACTATAGGGGAGAT<br>GGATTAGGTTTAGGTCCAATTG    | Amplification of DNA templates for dsRNA<br>synthesis; fwd                                                                                       |
|               | T7-PaMFS41-R1  | TAATACGACTCACTATAGGGGAGAG<br>TTAATGCAAATCCTACAACACTACC | Amplification of DNA templates for dsRNA<br>synthesis; rev (120-bp amplified fragment of<br><i>PaGTR6</i> using the forward and reverse primers) |
| <i>PaGTR7</i> | PaMFS40_3R     | TATTCAGGGCTCGTAATGCTGCTGGCTA                           | 3' RACE                                                                                                                                          |
|               | PaMFS40-CL1    | AGGTGCATTAGAATTTTAAATTGGATTG                           | Cloning in pCR4-TOPO vector for sequencing; fwd                                                                                                  |

|               |                |                                                           |                                                                                                                                                  |
|---------------|----------------|-----------------------------------------------------------|--------------------------------------------------------------------------------------------------------------------------------------------------|
|               | PaMFS40-CL2    | CCAAGAAGTCCATAACTATTAAGATAGACT                            | Cloning in pCR4-TOPO vector for sequencing; rev                                                                                                  |
|               | PaMFS40_SEQ1   | ACACCAATACATTTGTTGGTTAA                                   | Internal sequencing                                                                                                                              |
|               | PaMFS40_SEQ2   | TATTACAGTAACACCCGAGCAGT                                   | Internal sequencing                                                                                                                              |
|               | PaMFS40-IEX4-1 | ACGCGTCGACATGGATAACCAAATAAGAA<br>AAATCAAAA                | Expression of gene without stop codon in pIEx-4<br>vector; fwd                                                                                   |
|               | PaMFS40-IEX4-2 | ATAAGAATGCGGCCGCTTTTTTCGCATAATT<br>TCTCAATATTTCT          | Expression of gene without stop codon in pIEx-4<br>vector; rev                                                                                   |
|               | PaMFS40-QPF1   | CCAAAGGAAGCATAAAGGAGCAT                                   | qPCR; fwd                                                                                                                                        |
|               | PaMFS40-QPR1   | CAGTAACACCCGAGCAGTATTTAT                                  | qPCR; rev                                                                                                                                        |
|               | T7-PaMFS40-F1  | TAATACGACTCACTATAGGGAGAT<br>TACAGTTTGCTTCTTTGGATTGG       | Amplification of DNA templates for dsRNA<br>synthesis; fwd                                                                                       |
|               | T7-PaMFS40-R1  | TAATACGACTCACTATAGGGAGAG<br>ATATAAAAATGTAAACGTAGAAGATGCAA | Amplification of DNA templates for dsRNA<br>synthesis; rev (147-bp amplified fragment of<br><i>PaGTR7</i> using the forward and reverse primers) |
| <i>PaGTR8</i> | PaMFS48_3R     | ACCGCGCCTGCGTTGTTATTCGTTGTTA                              | 3' RACE                                                                                                                                          |
|               | PaMFS48_5R     | AGTCTCCCGATAAGCTGGTGCCTGCT                                | 5' RACE                                                                                                                                          |
|               | PaMFS48-CL1    | GCTGAGCAAATAAAGTGTCGAATT                                  | Cloning in pCR4-TOPO vector for sequencing; fwd                                                                                                  |
|               | PaMFS48-CL2    | ATGTATATTTTTGTAACATAAAGAGCCAA<br>AA                       | Cloning in pCR4-TOPO vector for sequencing; rev                                                                                                  |
|               | PaMFS48-QPF1   | CTAATGCCCAAACCTCTGCGAC                                    | Internal sequencing                                                                                                                              |
|               | PaMFS48-IEX4-1 | ACGCGTCGACATGAGAAAAATGAGTTTAGA<br>AGACCAT                 | Expression of gene without stop codon in pIEx-4<br>vector; fwd                                                                                   |
|               | PaMFS48-IEX4-2 | ATAAGAATGCGGCCGCATTTTTTCACGTTACT<br>TTTCAACATTTCT         | Expression of gene without stop codon in pIEx-4<br>vector; rev                                                                                   |
|               | PaMFS48-QPF4   | GGTTTAATACCGTTGCTGACG                                     | qPCR; fwd                                                                                                                                        |
|               | PaMFS48-QPR4   | CCTACCGAATCTCTCGATAACG                                    | qPCR; rev                                                                                                                                        |
|               | T7-PaMFS48-F1  | TAATACGACTCACTATAGGGAGAT<br>CAATTCATCATTATTGGTACAACCTC    | Amplification of DNA templates for dsRNA<br>synthesis; fwd                                                                                       |
|               | T7-PaMFS48-R1  | TAATACGACTCACTATAGGGAGAA<br>AGATGCAGAACCTGCCGATT          | Amplification of DNA templates for dsRNA<br>synthesis; rev (180-bp amplified fragment of<br><i>PaGTR8</i> using the forward and reverse primers) |
| <i>PaGTR9</i> | PaMFS16_5R_a   | TGCGCCACTGAAACCTAAACCTACGCCT                              | 5' RACE                                                                                                                                          |
|               | PaMFS16_5R_b   | ACACCGTAACCGCCCTGATCTCGGCT                                | 5' RACE                                                                                                                                          |
|               | PaMFS16-CL3    | AATGGTGCTTGCAGTGGTTT                                      | Cloning in pCR4-TOPO vector for sequencing; fwd                                                                                                  |

|                |                |                                                    |                                                                |
|----------------|----------------|----------------------------------------------------|----------------------------------------------------------------|
|                | PaMFS16-CL4    | CGCGTAAAATCGGCTTAATATGA                            | Cloning in pCR4-TOPO vector for sequencing; rev                |
|                | PaMFS16-IEX4-3 | GTCGACATGGATTTAGAAAATAAAACACAT<br>CAAACA           | Expression of gene without stop codon in pIEx-4<br>vector; fwd |
|                | PaMFS16-IEX4-4 | GCGGCCGCTTTTATTCGAAGCTTCGAATAAT<br>TTAACA          | Expression of gene without stop codon in pIEx-4<br>vector; rev |
|                | PaMFS16-QPF1   | CATCGTTAATAGCGTACCTTCAATG                          | qPCR; fwd                                                      |
|                | PaMFS16-QPR1   | CAATTCAGAGACCCACGCTTG                              | qPCR; rev, internal sequencing                                 |
| <i>PaGTR10</i> | PaMFS42_5R     | ACCATGTCGCCTGATAAGCTAGTGCCTGCT                     | 5' RACE                                                        |
|                | PaMFS42-CL5    | GACGATACAAAATTTGAAAACCTCAATAAAT<br>AAG             | Cloning in pCR4-TOPO vector for sequencing; fwd                |
|                | PaMFS42-CL8    | CATTCTAACATTATGGCATTAAAAGTATA<br>AGT               | Cloning in pCR4-TOPO vector for sequencing; rev                |
|                | PaMFS42-SEQ1   | CTGGTTGGGTGGTTTTCTCG                               | Internal sequencing                                            |
|                | PaMFS42-IEX4-1 | ACGCGTCGACATGGATTTAGAAAATAAGCC<br>GCAT             | Expression of gene without stop codon in pIEx-4<br>vector; fwd |
|                | PaMFS42-IEX4-3 | ATAAGAATGCGGCCGCTTTTATTTGTAGCTT<br>CGAATAATTTTTAGC | Expression of gene without stop codon in pIEx-4<br>vector; rev |
|                | PaMFS42-QPF1   | TCATCGTTAATAGCGTACCTTCAATG                         | qPCR; fwd                                                      |
|                | PaMFS42-QPR1   | GCAGTTCGGACGTCATCACTT                              | qPCR; rev                                                      |
| <i>PaGTR11</i> | PaMFS45_3R     | CACTGGGAGTATCAATGGCTTGGACATC                       | 3' RACE                                                        |
|                | PaMFS45_3Rb    | AGAGATGGAAGAGAGTCAACGTTGCGA                        | 3' RACE                                                        |
|                | PaMFS45_3Rc    | ACCGAGGCTTATTCCGTGATGTCGATATAC<br>GT               | 3' RACE                                                        |
|                | PaMFS45_5R     | CGGACCGATAATGTAACCAAGAAGATGCC<br>CA                | 5' RACE                                                        |
|                | PaMFS45-CL3    | CATTAAGAAGCACCAACTACCGTAG                          | Cloning in pCR4-TOPO vector for sequencing; fwd                |
|                | PaMFS45-CL4    | CGGTTGGTTATATTGGTTAAATTTACAA                       | Cloning in pCR4-TOPO vector for sequencing; rev                |
|                | PaMFS45-SEQ1   | CAAATGGGGCATCTTCTTGGT                              | Internal sequencing                                            |
|                | PaMFS45-IEX4-1 | ACGCGTCGACATGGAAGAGAGTCAACGTT<br>T                 | Expression of gene without stop codon in pIEx-4<br>vector; fwd |
|                | PaMFS45-IEX4-2 | ATAAGAATGCGGCCGCATGTATTTAAGTT<br>CGGAATAATTTTTCAAC | Expression of gene without stop codon in pIEx-4<br>vector; rev |
|                | PaMFS45-QPF1   | TCACTGGGAGTATCAATGGCTT                             | qPCR; fwd                                                      |
|                | PaMFS45-QPR1   | ACACCGCAAATAACAAATATCTCTTC                         | qPCR; rev                                                      |

|                              |                                                      |                                                         |                                                                |
|------------------------------|------------------------------------------------------|---------------------------------------------------------|----------------------------------------------------------------|
| <i>PaGTR12</i>               | PaMFS14_3R_a                                         | TGACTCTTTTCACTGGGAGCTTCAATGTCTTG<br>GA                  | 3' RACE                                                        |
|                              | PaMFS14_3R_b                                         | TTCTCAATGGTGCCGAAACACCCATATAT<br>TTG                    | 3' RACE                                                        |
|                              | PaMFS14-CL1                                          | AAAGAAAACCAAAAAAATTAATAATTTTTTT<br>AAGAAA               | Cloning in pCR4-TOPO vector for sequencing; fwd                |
|                              | PaMFS14-CL2                                          | CTAATTCATATTAACACAGCAAACCTTAGT                          | Cloning in pCR4-TOPO vector for sequencing; rev                |
|                              | PaMFS14_SEQ1                                         | ACCGAAGCTTATTCCGTAACGT                                  | Internal sequencing                                            |
|                              | PaMFS14-IEX4-3                                       | ACGCGTCGACATGCATTTAGAGATAAAAGA<br>AAACCACAAAG           | Expression of gene without stop codon in pIEx-4<br>vector; fwd |
|                              | PaMFS14-IEX4-2                                       | ATAAGAATGCGGCCGCACGTATTTTAAGTT<br>CGGAATAATTTTTTAAC     | Expression of gene without stop codon in pIEx-4<br>vector; rev |
|                              | PaMFS14-QPF1<br>PaMFS14-QPR1                         | GTTTTCAAAGTAACTTCCTACGTTCT<br>TATGAAGAACAAGATAGGGCAGTAC | qPCR; fwd<br>qPCR; rev                                         |
| <i>PaGTR13</i>               | PaMFS46_3R_a                                         | GAGCATCCCTAACTTGGACATCTCCAGT                            | 3' RACE                                                        |
|                              | PaMFS46_5R_a                                         | TATCGATGTCACGGAATGAGCCTCGGTA                            | 5' RACE                                                        |
|                              | PaMFS46_5R_b                                         | AATATATAGGTGTTTCCGGCGCCATTGAGA<br>AA                    | 5' RACE                                                        |
|                              | PaMFS46-CL1                                          | GGCATTAAAGAACATTTAAGAAGTACCAA                           | Cloning in pCR4-TOPO vector for sequencing; fwd                |
|                              | PaMFS46-CL2                                          | CAACATTTAGAATGTCTGGAGATTTTTTAG                          | Cloning in pCR4-TOPO vector for sequencing; rev                |
|                              | PaMFS46_SEQ1                                         | TCGATATTCCATCAAATGGGACA                                 | Internal sequencing                                            |
|                              | PaMFS46-IEX4-1                                       | ACGCGTCGACATGCATTTAGAGATGGAAGA<br>AAGTC                 | Expression of gene without stop codon in pIEx-4<br>vector; fwd |
|                              | PaMFS46-IEX4-2                                       | ATAAGAATGCGGCCGCATGTATTTTAAGTT<br>GGGAATAATTTTTTAACAT   | Expression of gene without stop codon in pIEx-4<br>vector; rev |
| PaMFS46-QPF3<br>PaMFS46-QPR3 | GTTTAGGACCTATTCCGCACAT<br>GAAAACAAACACTACAACGTAACAGG | qPCR; fwd<br>qPCR; rev                                  |                                                                |
| <i>PaMFS1</i>                | Pa3391-CL1                                           | CATTCTCCTAATCTTGGCATTATCTAT                             | Cloning in pCR4-TOPO vector for sequencing; fwd                |
|                              | Pa3391-CL2                                           | GTCTGCCTGCAGAAGATTTTAC                                  | Cloning in pCR4-TOPO vector for sequencing; rev                |
|                              | Pa3391-EX1                                           | TGTCGACATGAGTTCTGGCATAGATCAAAA<br>AT                    | Expression of gene without stop codon in pIEx-4<br>vector; fwd |
|                              | Pa3391-EX2                                           | TGCGGCCGCCCTGGTTTTTCAGGTATTCCTG                         | Expression of gene without stop codon in pIEx-4<br>vector; rev |
|                              | Pa3391-S1                                            | GTGGGTCGGAAGAGATGCTT                                    | Internal sequencing                                            |



|               |                                                  |                                                                                            |                                                                                                                                                                      |
|---------------|--------------------------------------------------|--------------------------------------------------------------------------------------------|----------------------------------------------------------------------------------------------------------------------------------------------------------------------|
|               | Pa3391-QPF1<br>Pa3391-QPR1                       | CAATTCGGCAGGTACCAGTT<br>TTCGTCTCCTGCCAGTCTTT                                               | qPCR; fwd<br>qPCR; rev                                                                                                                                               |
| <i>PaMFS2</i> | Pa6623-7-CL1<br>Pa6623-7-CL2<br>Pa6623-7-EX1     | GAGCAATTACTTAATTAGATGGCAGT<br>ATACACACAATGTACCACAGCTTAAA<br>TGTCGACATGGTCGAAATGGGCAAAG     | Cloning in pCR4-TOPO vector for sequencing; fwd<br>Cloning in pCR4-TOPO vector for sequencing; rev<br>Expression of gene without stop codon in pIEx-4<br>vector; fwd |
|               | Pa6623-7-EX2                                     | TGCGGCCGCATTTCCAATCTCCTCCTGGATT                                                            | Expression of gene without stop codon in pIEx-4<br>vector; rev                                                                                                       |
|               | Pa6623-7-S1<br>Pa6623-7-QPF2<br>Pa6623-7-QPR2    | AGCGTTATCATGGCTGGATT<br>ACAGTACATGAGCGGTGCAG<br>GCGCTACACTATCGCCAGAT                       | Internal sequencing<br>qPCR; fwd<br>qPCR; rev                                                                                                                        |
| <i>PaMFS3</i> | Pa19756-1-CL1<br>Pa19756-1-CL2<br>Pa19756-1-EX1  | GTTGAGGTGATTGCAGGAAC<br>GTTAGACTGATTGCACTTGAGGA<br>TGTCGACATGGGTAAATTGGAAGAAGTAAA<br>ATATG | Cloning in pCR4-TOPO vector for sequencing; fwd<br>Cloning in pCR4-TOPO vector for sequencing; rev<br>Expression of gene without stop codon in pIEx-4<br>vector; fwd |
|               | Pa19756-1-EX2                                    | TGCGGCCGCAGCGCATTTTCTAAACAATTG<br>AA                                                       | Expression of gene without stop codon in pIEx-4<br>vector; rev                                                                                                       |
|               | Pa19756-1-S1<br>Pa19756-1-QPF2<br>Pa19756-1-QPR2 | CTGACGGAAGTGTGCGGAGAAT<br>TGCAGTGTCTTTCTCCGTTG<br>CCGTAAACAATCCCACGAAC                     | Internal sequencing<br>qPCR; fwd<br>qPCR; rev                                                                                                                        |
| <i>PaMFS4</i> | Pa20117-CL1<br>Pa20117-CL2<br>Pa20117-EX1        | CACCCTGCATTGTATCAGGATT<br>TTTACTTAAACTTGACAAACATGACTT<br>TGTCGACATGCTCTCCGGAAGCGCC         | Cloning in pCR4-TOPO vector for sequencing; fwd<br>Cloning in pCR4-TOPO vector for sequencing; rev<br>Expression of gene without stop codon in pIEx-4<br>vector; fwd |
|               | Pa20117-EX2                                      | TGCGGCCGCCCAACGTTTCAATTTAATTCGA<br>TA                                                      | Expression of gene without stop codon in pIEx-4<br>vector; rev                                                                                                       |
|               | Pa20117-S1<br>Pa20117-QPF4<br>Pa20117-QPR4       | GAGCTACAAGCCTTTCACGTT<br>CACTGCGATAGTCGGTGTAGTT<br>CCAGAGCAGAGCTTAACAGCA                   | Internal sequencing<br>qPCR; fwd<br>qPCR; rev                                                                                                                        |
| <i>PaMFS5</i> | Pa22183-CL1<br>Pa22183-CL2<br>Pa22183-EX1        | TGTGGATTTAACATTACCTTACTCCTT<br>GAACGCAATTCATATTTTCTAGCTT<br>TGTCGACATGGCCAACCGCAAAAATG     | Cloning in pCR4-TOPO vector for sequencing; fwd<br>Cloning in pCR4-TOPO vector for sequencing; rev<br>Expression of gene without stop codon in pIEx-4<br>vector; fwd |

|               |                |                                                  |                                                                |
|---------------|----------------|--------------------------------------------------|----------------------------------------------------------------|
|               | Pa22183-EX2    | TGCGGCCGCATAATTTGTAAACATTTCTTGT<br>ATTTTCATG     | Expression of gene without stop codon in pIEx-4<br>vector; rev |
|               | Pa22183-S1     | GATGCCAAATTTTCGCTGGTAT                           | Internal sequencing                                            |
|               | Pa22183-QPF1   | GGTCGTTTCTGCTGCCTTAG                             | qPCR; fwd                                                      |
|               | Pa22183-QPR1   | TTGTGTTCCCTCGCACAAATTC                           | qPCR; rev                                                      |
| <i>PaMFS6</i> | Pa6623-3-CL1   | TGAGTTGCTTTTATCCTGTGCTAT                         | Cloning in pCR4-TOPO vector for sequencing; fwd                |
|               | Pa6623-3-CL2   | GATAAGGCTTACAAGCAGTAGATAGGT                      | Cloning in pCR4-TOPO vector for sequencing; rev                |
|               | Pa6623-3-EX1   | TGTCGACATGACAGAAAATCGTGTAATTTTC<br>G             | Expression of gene without stop codon in pIEx-4<br>vector; fwd |
|               | Pa6623-3-EX2   | TGCGGCCGCATAATCGGCTAATATTTGCTG<br>GATT           | Expression of gene without stop codon in pIEx-4<br>vector; rev |
|               | Pa6623-3-S1    | CATTTGCATATCGATGGCATT                            | Internal sequencing                                            |
|               | Pa6623-3-QPF1  | TTGGTTGGCTCAGTGTTTCAG                            | qPCR; fwd                                                      |
|               | Pa6623-3-QPR1  | TCTCCGGTGCTAAATGGAAC                             | qPCR; rev                                                      |
| <i>PaMFS7</i> | PaMFS13-CL1    | GATATCAAGCAGTGTATTAAGCACAAT                      | Cloning in pCR4-TOPO vector for sequencing; fwd                |
|               | PaMFS13-CL2    | TTTGTTTGAATCCAGTTGACCAA                          | Cloning in pCR4-TOPO vector for sequencing; rev                |
|               | PaMFS13-SEQ1   | TCCGGTCTTCAGCATCAAATACT                          | Internal sequencing                                            |
|               | PaMFS13-SEQ2   | CCATAACCAGCGAGCTCTTC                             | Internal sequencing                                            |
|               | PaMFS13-IEX4-1 | ACGCGTTCGACATGGAAGATCCCAACGTTTC<br>A             | Expression of gene without stop codon in pIEx-4<br>vector; fwd |
|               | PaMFS13-IEX4-2 | ATAAGAATGCGGCCGCAAACCTTTTCAACA<br>TCTGCTGTATTT   | Expression of gene without stop codon in pIEx-4<br>vector; rev |
|               | PaMFS13-QPF2   | GGGCATTTGTTTCGCGTATCT                            | qPCR; fwd                                                      |
|               | PaMFS13-QPR2   | GGCACGATGAAGAAGAGCAG                             | qPCR; rev                                                      |
| <i>PaMFS8</i> | PaMFS44_5R_a   | TATCGCGCCGGCCACACAATTTACGCTA                     | 5' RACE                                                        |
|               | PaMFS44_5R_b   | TCGACTACGAAGGATGCGACTGTGAAGA                     | 5' RACE                                                        |
|               | PaMFS44-CL8    | GTGAATATGTGGGGAAATGGTATATT                       | Cloning in pCR4-TOPO vector for sequencing; fwd                |
|               | PaMFS44-CL7    | GGTTCTAATGATTTTGTACAATTTACATAGG<br>TAT           | Cloning in pCR4-TOPO vector for sequencing; rev                |
|               | PaMFS44-IEX4-1 | ACGCGTTCGACATGTCCGTCGAAATAGCTGT<br>TA            | Expression of gene without stop codon in pIEx-4<br>vector; fwd |
|               | PaMFS44-IEX4-2 | ATAAGAATGCGGCCGCTCTTTCAAGCATTTT<br>CTGTATTTTCATC | Expression of gene without stop codon in pIEx-4<br>vector; rev |
|               | PaMFS44-QPF1   | CACTGTCGCATCCTTCGTAGT                            | qPCR; fwd                                                      |

|                  |              |                                                       |                                                                                                                                                |
|------------------|--------------|-------------------------------------------------------|------------------------------------------------------------------------------------------------------------------------------------------------|
|                  | PaMFS44-QPR1 | GCCATTGGAGTTGTTGCAGAG                                 | qPCR; rev, internal sequencing                                                                                                                 |
| <i>PaMFS9_ps</i> | PaMFS50_3R   | CCACTGCTAACTAAATACTGTTCCGGTGTTA<br>CC                 | 3' RACE                                                                                                                                        |
|                  | PaMFS50_5R_a | AGAAACAGAGGTATAGCGGTA<br>CTAGTGGTA<br>GA              | 5' RACE                                                                                                                                        |
|                  | PaMFS50_5R_b | GCTACAATGTCACCTGATAAGCTAGTACCT<br>G                   | 5' RACE                                                                                                                                        |
|                  | PaMFS50-CL1  | TATAAGGTGCTGAGTACTAACGGT                              | Cloning in pCR4-TOPO vector for sequencing; fwd                                                                                                |
|                  | PaMFS50-CL2  | GGTATTAAGGGGTATTATAAAATGGTATTT<br>G                   | Cloning in pCR4-TOPO vector for sequencing; rev                                                                                                |
|                  | PaMFS50_SEQ1 | TGATATATTAGGCAGGAAGCGGT                               | Internal sequencing                                                                                                                            |
| <i>eIF4A</i>     | qPaEiF4a_F   | CACGGTGACATGGAGCAAAG                                  | qPCR; fwd                                                                                                                                      |
|                  | qPaEiF4a_R   | ACCTCTGGCCAACAAATCGG                                  | qPCR; rev                                                                                                                                      |
| <i>RPL13a</i>    | qPaRPL13a_F  | CGTTCGTACGTTGGAGAGCA                                  | qPCR; fwd                                                                                                                                      |
|                  | qPaRPL13a_R  | GCTTGGCAACCTTTTCAGTC                                  | qPCR; rev                                                                                                                                      |
| <i>RPS4e</i>     | qPaRPS4e_F   | CGTATTACTGCTGAAGAAGC                                  | qPCR; fwd                                                                                                                                      |
|                  | qPaRPS4e_R   | ATCGTGGGTCACCAAGAACG                                  | qPCR; rev                                                                                                                                      |
| <i>RPL7</i>      | qPaRPL7_F    | AGGCTGAAGGAACGAGATGA                                  | qPCR; fwd                                                                                                                                      |
|                  | qPaRPL7_R    | CTTCGGCTGGAACGTAGAAG                                  | qPCR; rev                                                                                                                                      |
| <i>IMPI</i>      | T7-IMPI-F2   | TAATACGACTCACTATAGGGAGAGTAATGA<br>CAAGTGCTACTGTGAAGAT | Amplification of DNA templates for dsRNA<br>synthesis; fwd                                                                                     |
|                  | T7-IMPI-R2   | TAATACGACTCACTATAGGGAGAGGGGAGT<br>CAATGCAGGAAAAC      | Amplification of DNA templates for dsRNA<br>synthesis; rev (223-bp amplified fragment of <i>IMPI</i><br>using the forward and reverse primers) |

114 **Supplementary Table 6.** Gene expression variability across tissues among four tested reference genes.

| <b>Target gene</b> | <b>Tissue</b>      | <b>Mean Cq value of four biological replicates</b> | <b>Standard deviation of the mean Cq values</b> |
|--------------------|--------------------|----------------------------------------------------|-------------------------------------------------|
| <i>eIF4A</i>       | Foregut            | 21.70                                              | 0.30                                            |
|                    | Midgut             | 21.96                                              |                                                 |
|                    | Hindgut            | 21.62                                              |                                                 |
|                    | Malpighian tubules | 21.39                                              |                                                 |
|                    | Other tissues      | 21.17                                              |                                                 |
| <i>RPL13a</i>      | Foregut            | 20.81                                              | 0.31                                            |
|                    | Midgut             | 20.44                                              |                                                 |
|                    | Hindgut            | 20.98                                              |                                                 |
|                    | Malpighian tubules | 20.22                                              |                                                 |
|                    | Other tissues      | 20.49                                              |                                                 |
| <i>RPL7</i>        | Foregut            | 21.42                                              | 0.42                                            |
|                    | Midgut             | 20.39                                              |                                                 |
|                    | Hindgut            | 21.12                                              |                                                 |
|                    | Malpighian tubules | 20.63                                              |                                                 |
|                    | Other tissues      | 20.62                                              |                                                 |
| <i>RPS4e</i>       | Foregut            | 21.37                                              | 0.46                                            |
|                    | Midgut             | 20.44                                              |                                                 |
|                    | Hindgut            | 21.39                                              |                                                 |
|                    | Malpighian tubules | 20.77                                              |                                                 |
|                    | Other tissues      | 20.52                                              |                                                 |

115 **Supplementary Table 7.** Multiple reaction monitoring (MRM) transitions for compounds determined by LC-MS/MS.

| Compound                    | Q1 [m/z] | Q3 [m/z]          | CE [eV] | Use                                                                                                                    |
|-----------------------------|----------|-------------------|---------|------------------------------------------------------------------------------------------------------------------------|
| 2Prop GLS                   | 358      | 95.9              | -60     |                                                                                                                        |
| 4MSOB GLS                   | 435.9    | 95.8              | -60     |                                                                                                                        |
| 4MTB GLS                    | 419.9    | 95.9              | -58     |                                                                                                                        |
| 2PE GLS                     | 421.81   | 95.9              | -50     |                                                                                                                        |
| Benzyl GLS                  | 408      | 95.9              | -60     | All samples except those of<br>the pH-dependency<br>experiment using the<br><i>Xenopus</i> oocyte expression<br>system |
| 4OHB GLS                    | 424      | 95.9              | -60     |                                                                                                                        |
| I3M GLS                     | 447      | 95.8              | -50     |                                                                                                                        |
| 3-Butenyl                   | 372      | 95.9              | -60     |                                                                                                                        |
| Salicin                     | 285      | 123               | -18     |                                                                                                                        |
| Dhurrin                     | 310      | 179               | -10     |                                                                                                                        |
| Linamarin (formiate adduct) | 292      | 45                | -26     |                                                                                                                        |
| Aucubin (formiate adduct)   | 391      | 183               | -18     |                                                                                                                        |
| Catalpol (formiate adduct)  | 407      | 199               | -18     |                                                                                                                        |
| 2Prop GLS                   | 358      | 97.0 <sup>Q</sup> | 22      |                                                                                                                        |
|                             | 358      | 75                | 30      |                                                                                                                        |
|                             | 358      | 259               | 20      |                                                                                                                        |
| I3M GLS                     | 447      | 97.0 <sup>Q</sup> | 10      |                                                                                                                        |
|                             | 447      | 259               | 10      |                                                                                                                        |
|                             | 447      | 205               | 10      |                                                                                                                        |

116 <sup>Q</sup>quantifier ion, additional transitions are used for identification only.

117 **Supplementary Table 8.** *In silico* off-target prediction of the dsRNA designs against the local *P. armoraciae* transcriptome database.

| Target gene   | Hit                            | 1-mismatch count | 2-mismatch count | Sequence annotation                                      |
|---------------|--------------------------------|------------------|------------------|----------------------------------------------------------|
| <i>IMPI</i>   | <i>Parm_de_novo_new_c119</i>   | 0                | 1                | Cytochrome c oxidase assembly protein COX15 homolog      |
|               | <i>Parm_de_novo_new_c2603</i>  | 0                | 1                | Serotonin receptor                                       |
|               | <i>Parm_de_novo_new_c5811</i>  | 0                | 1                | Acyl-CoA synthetase family member 4-like                 |
|               | <i>Parm_de_novo_new_c12340</i> | 0                | 1                | Zinc finger protein 333 isoform X3                       |
|               | <i>Parm_de_novo_new_c14305</i> | 0                | 1                | Retrovirus-related Pol polyprotein from transposon 412   |
| <i>PaGTR1</i> | <i>Parm_de_novo_new_c331</i>   | 0                | 1                | Nucleolar complex protein 3 homolog                      |
|               | <i>Parm_de_novo_new_c506</i>   | 0                | 1                | Methyl-CpG-binding domain protein 5                      |
|               | <i>Parm_de_novo_new_c521</i>   | 0                | 5                | Mannosyl-oligosaccharide alpha-1,2-mannosidase isoform A |
|               | <i>Parm_de_novo_new_c800</i>   | 0                | 3                | Cyclin-Y                                                 |
|               | <i>Parm_de_novo_new_c1397</i>  | 0                | 5                | Actin-related protein 2/3 complex subunit 4              |
|               | <i>Parm_de_novo_new_c1628</i>  | 0                | 1                | Fanconi anemia group M protein                           |
|               | <i>Parm_de_novo_new_c2850</i>  | 0                | 1                | Sorting nexin-27                                         |
|               | <i>Parm_de_novo_new_c3233</i>  | 0                | 2                | 3-hydroxy-3-methylglutaryl-coenzyme A reductase          |
|               | <i>Parm_de_novo_new_c4725</i>  | 0                | 3                | Max-binding protein MNT-like isoform X1                  |
|               | <i>Parm_de_novo_new_c7102</i>  | 0                | 1                | Integrator complex subunit 12                            |
|               | <i>Parm_de_novo_new_c7238</i>  | 0                | 1                | Not annotated                                            |
|               | <i>Parm_de_novo_new_c8110</i>  | 0                | 3                | Protein tramtrack, beta isoform-like isoform X1          |
|               | <i>Parm_de_novo_new_c8310</i>  | 0                | 2                | Ribonuclease P protein subunit p29-like                  |
|               | <i>Parm_de_novo_new_c8643</i>  | 2                | 5                | Arfaptin-2                                               |
|               | <i>Parm_de_novo_new_c10690</i> | 0                | 5                | Not annotated                                            |
|               | <i>Parm_de_novo_new_c10867</i> | 0                | 2                | Not annotated                                            |
|               | <i>Parm_de_novo_new_c14225</i> | 0                | 6                | Not annotated                                            |
|               | <i>Parm_de_novo_new_c15034</i> | 0                | 1                | Phosphatidylinositol 4-kinase type 2-beta                |
|               | <i>Parm_de_novo_new_c15387</i> | 0                | 2                | Not annotated                                            |

|                                |                                |                               |                         |                                                           |                       |
|--------------------------------|--------------------------------|-------------------------------|-------------------------|-----------------------------------------------------------|-----------------------|
|                                | <i>Parm_de_novo_new_c17921</i> | 0                             | 1                       | Formin 1,2/cappuccino                                     |                       |
|                                | <i>Parm_de_novo_new_c23731</i> | 0                             | 1                       | Putative gag-pol protein                                  |                       |
|                                | <i>Parm_de_novo_new_c23755</i> | 0                             | 1                       | Not annotated                                             |                       |
|                                | <i>Parm_de_novo_new_c35063</i> | 0                             | 2                       | Hypothetical protein GGTG_04705                           |                       |
| <i>PaGTR2</i>                  | <i>Parm_de_novo_new_c1115</i>  | 0                             | 3                       | Probable ATP-dependent RNA helicase DDX17-like            |                       |
|                                | <i>Parm_de_novo_new_c2182</i>  | 1                             | 2                       | Digestive organ expansion factor homolog                  |                       |
|                                | <i>Parm_de_novo_new_c3973</i>  | 0                             | 3                       | Cullin-3 isoform X1                                       |                       |
|                                | <i>Parm_de_novo_new_c4715</i>  | 0                             | 3                       | Protein virilizer                                         |                       |
|                                | <i>Parm_de_novo_new_c6467</i>  | 0                             | 1                       | Alpha-tocopherol transfer protein-like isoform            |                       |
|                                | <i>Parm_de_novo_new_c7416</i>  | 0                             | 1                       | Not annotated                                             |                       |
|                                | <i>Parm_de_novo_new_c16931</i> | 0                             | 1                       | Antennal esterase CXE13                                   |                       |
|                                | <i>Parm_de_novo_new_c21176</i> | 0                             | 2                       | Not annotated                                             |                       |
|                                | <i>Parm_de_novo_new_c23215</i> | 0                             | 1                       | Not annotated                                             |                       |
|                                | <i>Parm_de_novo_new_c24939</i> | 0                             | 2                       | Not annotated                                             |                       |
|                                | <i>Parm_de_novo_new_c25100</i> | 0                             | 1                       | Not annotated                                             |                       |
|                                | <i>Parm_de_novo_new_c32959</i> | 0                             | 4                       | Not annotated                                             |                       |
|                                | <i>PaGTR3</i>                  | <i>Parm_de_novo_new_c441</i>  | 0                       | 1                                                         | Titin-like isoform X2 |
|                                |                                | <i>Parm_de_novo_new_c1351</i> | 0                       | 2                                                         | Protein lap4-like     |
| <i>Parm_de_novo_new_c2147</i>  |                                | 0                             | 1                       | 116 kDa U5 small nuclear ribonucleoprotein component-like |                       |
| <i>Parm_de_novo_new_c5806</i>  |                                | 0                             | 1                       | Serpin peptidase inhibitor 19                             |                       |
| <i>Parm_de_novo_new_c13822</i> |                                | 0                             | 1                       | Slit homolog 3 protein-like                               |                       |
| <i>Parm_de_novo_new_c16099</i> |                                | 0                             | 1                       | Encapsulation-relating protein                            |                       |
| <i>Parm_de_novo_new_c21949</i> |                                | 0                             | 1                       | 60 kDa lysophospholipase isoform X2                       |                       |
| <i>Parm_de_novo_new_c22379</i> |                                | 0                             | 1                       | Not annotated                                             |                       |
| <i>Parm_de_novo_new_c29293</i> | 0                              | 1                             | Surface antigen protein |                                                           |                       |
| <i>PaGTR5</i>                  | <i>Parm_de_novo_new_c1898</i>  | 0                             | 6                       | Golgi to ER traffic protein 4 homolog                     |                       |
|                                | <i>Parm_de_novo_new_c19031</i> | 2                             | 2                       | Not annotated                                             |                       |
|                                | <i>Parm_de_novo_new_c20312</i> | 0                             | 4                       | Not annotated                                             |                       |

|               |                                |   |   |                                                                      |
|---------------|--------------------------------|---|---|----------------------------------------------------------------------|
|               | <i>Parm_de_novo_new_c8428</i>  | 0 | 3 | Not annotated                                                        |
|               | <i>Parm_de_novo_new_c27983</i> | 1 | 2 | Not annotated                                                        |
|               | <i>Parm_de_novo_new_c33950</i> | 0 | 3 | Solute carrier family 26 member 6-like                               |
|               | <i>Parm_de_novo_new_c1413</i>  | 0 | 2 | WD repeat and FYVE domain-containing protein 3                       |
|               | <i>Parm_de_novo_new_c5502</i>  | 0 | 2 | Not annotated                                                        |
|               | <i>Parm_de_novo_new_c10910</i> | 0 | 2 | Haemolymph juvenile hormone binding protein                          |
|               | <i>Parm_de_novo_new_c14862</i> | 0 | 2 | Serine-rich protein                                                  |
|               | <i>Parm_de_novo_new_c1217</i>  | 0 | 1 | Vacuolar protein sorting-associated protein 4B                       |
|               | <i>Parm_de_novo_new_c2400</i>  | 0 | 1 | Forkhead box protein P1-like isoform X9                              |
|               | <i>Parm_de_novo_new_c2888</i>  | 0 | 1 | [Pyruvate dehydrogenase (acetyl-transferring)] kinase, mitochondrial |
|               | <i>Parm_de_novo_new_c3461</i>  | 0 | 1 | Midasin-like                                                         |
|               | <i>Parm_de_novo_new_c4615</i>  | 0 | 1 | Not annotated                                                        |
|               | <i>Parm_de_novo_new_c5804</i>  | 0 | 1 | Small conductance calcium-activated potassium channel protein        |
|               | <i>Parm_de_novo_new_c6089</i>  | 0 | 1 | GTP-binding protein Rit1                                             |
|               | <i>Parm_de_novo_new_c7402</i>  | 0 | 1 | 4-coumarate--CoA ligase 1                                            |
|               | <i>Parm_de_novo_new_c8215</i>  | 0 | 1 | Not annotated                                                        |
|               | <i>Parm_de_novo_new_c8314</i>  | 0 | 1 | Dolichyldiphosphatase 1-like                                         |
|               | <i>Parm_de_novo_new_c9563</i>  | 0 | 1 | Not annotated                                                        |
|               | <i>Parm_de_novo_new_c10643</i> | 0 | 1 | Glycoside hydrolase family 28                                        |
|               | <i>Parm_de_novo_new_c10861</i> | 0 | 1 | Not annotated                                                        |
|               | <i>Parm_de_novo_new_c11146</i> | 0 | 1 | Not annotated                                                        |
|               | <i>Parm_de_novo_new_c14215</i> | 0 | 1 | Not annotated                                                        |
|               | <i>Parm_de_novo_new_c33204</i> | 0 | 1 | Major antigen-like                                                   |
|               | <i>Parm_de_novo_new_c33479</i> | 0 | 1 | Not annotated                                                        |
| <i>PaGTR6</i> | <i>Parm_de_novo_new_c30521</i> | 0 | 3 | Cellulose synthase A catalytic subunit 2 [UDP-forming]               |
|               | <i>Parm_de_novo_new_c665</i>   | 0 | 1 | Activating signal cointegrator 1                                     |
|               | <i>Parm_de_novo_new_c5949</i>  | 0 | 1 | Zinc finger and BTB domain-containing protein 49-like                |
|               | <i>Parm_de_novo_new_c6478</i>  | 0 | 1 | Ras GTPase-activating protein-binding protein 2                      |



|               |                                |   |   |                                                                   |
|---------------|--------------------------------|---|---|-------------------------------------------------------------------|
|               | <i>Parm_de_novo_new_c14862</i> | 0 | 1 | Serine-rich protein                                               |
|               | <i>Parm_de_novo_new_c4682</i>  | 0 | 2 | DNA topoisomerase 2-like protein                                  |
| <i>PaGTR7</i> | <i>Parm_de_novo_new_c330</i>   | 0 | 1 | Not annotated                                                     |
|               | <i>Parm_de_novo_new_c3931</i>  | 0 | 1 | Structure-specific endonuclease subunit slx1                      |
|               | <i>Parm_de_novo_new_c13139</i> | 0 | 1 | CDP-diacylglycerol-glycerol-3-phosphate 3-phosphatidyltransferase |
|               | <i>Parm_de_novo_new_c2804</i>  | 0 | 2 | Vermiform, isoform G                                              |
|               | <i>Parm_de_novo_new_c24044</i> | 0 | 2 | RNA polymerase beta subunit-2                                     |
| <i>PaGTR8</i> | <i>Parm_de_novo_new_c2121</i>  | 0 | 1 | Sedoheptulokinase                                                 |
|               | <i>Parm_de_novo_new_c3301</i>  | 0 | 1 | Serine/threonine-protein kinase polo                              |
|               | <i>Parm_de_novo_new_c17674</i> | 0 | 1 | Not annotated                                                     |
|               | <i>Parm_de_novo_new_c20798</i> | 0 | 1 | Not annotated                                                     |
|               | <i>Parm_de_novo_new_c25657</i> | 0 | 1 | Not annotated                                                     |

| Sample        | Transformation | Method      | Statistics                          | P value       | Software | Figure         |         |
|---------------|----------------|-------------|-------------------------------------|---------------|----------|----------------|---------|
| <i>PaGTR1</i> | 2Prop GLS      | Square-root | Two-tailed Student's <i>t</i> -test | $t = -31.068$ | < 0.001  | SigmaPlot 14.0 | Fig. 1b |
|               | 4MTB GLS       | -           | Two-tailed Student's <i>t</i> -test | $t = -18.529$ | < 0.001  | SigmaPlot 14.0 |         |
|               | 4OHB GLS       | -           | Two-tailed Student's <i>t</i> -test | $t = -37.191$ | < 0.001  | SigmaPlot 14.0 |         |
|               | Benzyl GLS     | -           | Two-tailed Student's <i>t</i> -test | $t = -30.432$ | < 0.001  | SigmaPlot 14.0 |         |
|               | 2PE GLS        | -           | Two-tailed Student's <i>t</i> -test | $t = -33.231$ | < 0.001  | SigmaPlot 14.0 |         |
|               | I3M GLS        | -           | Two-tailed Student's <i>t</i> -test | $t = -37.959$ | < 0.001  | SigmaPlot 14.0 |         |
| <i>PaGTR2</i> | 2Prop GLS      | -           | Two-tailed Student's <i>t</i> -test | $t = -21.127$ | < 0.001  | SigmaPlot 14.0 |         |
|               | 4MSOB GLS      | -           | Two-tailed Student's <i>t</i> -test | $t = -30.704$ | < 0.001  | SigmaPlot 14.0 |         |
|               | 4MTB GLS       | -           | Two-tailed Student's <i>t</i> -test | $t = -28.404$ | < 0.001  | SigmaPlot 14.0 |         |
|               | 4OHB GLS       | -           | Two-tailed Student's <i>t</i> -test | $t = -20.774$ | < 0.001  | SigmaPlot 14.0 |         |
|               | Benzyl GLS     | -           | Two-tailed Student's <i>t</i> -test | $t = -13.320$ | < 0.001  | SigmaPlot 14.0 |         |
|               | 2PE GLS        | -           | Two-tailed Student's <i>t</i> -test | $t = -16.935$ | < 0.001  | SigmaPlot 14.0 |         |
| <i>PaGTR3</i> | I3M GLS        | -           | Two-tailed Student's <i>t</i> -test | $t = -25.150$ | < 0.001  | SigmaPlot 14.0 |         |
|               | 2Prop GLS      | -           | Two-tailed Student's <i>t</i> -test | $t = -22.769$ | < 0.001  | SigmaPlot 14.0 |         |
|               | 4MSOB GLS      | -           | Two-tailed Student's <i>t</i> -test | $t = -15.055$ | < 0.001  | SigmaPlot 14.0 |         |
|               | 4MTB GLS       | -           | Two-tailed Student's <i>t</i> -test | $t = -64.586$ | < 0.001  | SigmaPlot 14.0 |         |
|               | 4OHB GLS       | -           | Two-tailed Student's <i>t</i> -test | $t = -43.066$ | < 0.001  | SigmaPlot 14.0 |         |
|               | Benzyl GLS     | -           | Two-tailed Student's <i>t</i> -test | $t = -61.129$ | < 0.001  | SigmaPlot 14.0 |         |
| <i>PaGTR4</i> | 2PE GLS        | -           | Two-tailed Student's <i>t</i> -test | $t = -24.741$ | < 0.001  | SigmaPlot 14.0 |         |
|               | I3M GLS        | -           | Two-tailed Student's <i>t</i> -test | $t = -20.555$ | < 0.001  | SigmaPlot 14.0 |         |
|               | 2Prop GLS      | -           | Two-tailed Student's <i>t</i> -test | $t = -34.895$ | < 0.001  | SigmaPlot 14.0 |         |
| <i>PaGTR5</i> | 2Prop GLS      | -           | Two-tailed Student's <i>t</i> -test | $t = -31.661$ | < 0.001  | SigmaPlot 14.0 |         |
|               | 4MSOB          | -           | Two-tailed Student's <i>t</i> -test | $t = -10.966$ | < 0.001  | SigmaPlot 14.0 |         |

|                |            |                   |                                     |                |         |                |
|----------------|------------|-------------------|-------------------------------------|----------------|---------|----------------|
|                | GLS        |                   |                                     |                |         |                |
| <i>PaGTR6</i>  | 4MTB GLS   | -                 | Two-tailed Student's <i>t</i> -test | $t = -98.236$  | < 0.001 | SigmaPlot 14.0 |
|                | Benzyl GLS | -                 | Two-tailed Student's <i>t</i> -test | $t = -10.207$  | < 0.001 | SigmaPlot 14.0 |
|                | 2PE GLS    | -                 | Two-tailed Student's <i>t</i> -test | $t = -46.917$  | < 0.001 | SigmaPlot 14.0 |
|                | 2Prop GLS  | -                 | Two-tailed Student's <i>t</i> -test | $t = -30.115$  | < 0.001 | SigmaPlot 14.0 |
|                | 4MTB GLS   | -                 | Generalized least squares           | $LR = 13.019$  | < 0.001 | R 3.5.1        |
|                | Benzyl GLS | -                 | Two-tailed Student's <i>t</i> -test | $t = -33.478$  | < 0.001 | SigmaPlot 14.0 |
| <i>PaGTR7</i>  | 2PE GLS    | Square-root       | Two-tailed Student's <i>t</i> -test | $t = -56.933$  | < 0.001 | SigmaPlot 14.0 |
|                | 2Prop GLS  | Square-root       | Two-tailed Student's <i>t</i> -test | $t = -127.779$ | < 0.001 | SigmaPlot 14.0 |
| <i>PaGTR8</i>  | 4MTB GLS   | -                 | Two-tailed Student's <i>t</i> -test | $t = -49.878$  | < 0.001 | SigmaPlot 14.0 |
|                | 4OHB GLS   | -                 | Two-tailed Student's <i>t</i> -test | $t = -50.592$  | < 0.001 | SigmaPlot 14.0 |
| <i>PaGTR9</i>  | Benzyl GLS | -                 | Two-tailed Student's <i>t</i> -test | $t = -42.186$  | < 0.001 | SigmaPlot 14.0 |
|                | 2PE GLS    | -                 | Two-tailed Student's <i>t</i> -test | $t = -61.485$  | < 0.001 | SigmaPlot 14.0 |
|                | 2Prop GLS  | -                 | Two-tailed Student's <i>t</i> -test | $t = -84.908$  | < 0.001 | SigmaPlot 14.0 |
|                | 4MTB GLS   | -                 | Two-tailed Student's <i>t</i> -test | $t = -66.857$  | < 0.001 | SigmaPlot 14.0 |
|                | Benzyl GLS | -                 | Two-tailed Student's <i>t</i> -test | $t = -134.168$ | < 0.001 | SigmaPlot 14.0 |
|                | 2PE GLS    | -                 | Two-tailed Student's <i>t</i> -test | $t = -99.949$  | < 0.001 | SigmaPlot 14.0 |
| <i>PaGTR10</i> | I3M GLS    | Log <sub>10</sub> | Two-tailed Student's <i>t</i> -test | $t = -26.343$  | < 0.001 | SigmaPlot 14.0 |
|                | 2Prop GLS  | Square-root       | Two-tailed Student's <i>t</i> -test | $t = -61.124$  | < 0.001 | SigmaPlot 14.0 |
| <i>PaGTR11</i> | 4MTB GLS   | -                 | Two-tailed Student's <i>t</i> -test | $t = -74.811$  | < 0.001 | SigmaPlot 14.0 |
|                | 2Prop GLS  | -                 | Two-tailed Student's <i>t</i> -test | $t = -51.331$  | < 0.001 | SigmaPlot 14.0 |
|                | 4MSOB GLS  | -                 | Two-tailed Student's <i>t</i> -test | $t = -49.142$  | < 0.001 | SigmaPlot 14.0 |
|                | 4MTB GLS   | -                 | Two-tailed Student's <i>t</i> -test | $t = -44.957$  | < 0.001 | SigmaPlot 14.0 |
|                | 4OHB GLS   | -                 | Two-tailed Student's <i>t</i> -test | $t = -42.624$  | < 0.001 | SigmaPlot 14.0 |
|                | Benzyl GLS | -                 | Two-tailed Student's <i>t</i> -test | $t = -57.609$  | < 0.001 | SigmaPlot 14.0 |

|                              |                    |             |                                     |               |         |                |         |
|------------------------------|--------------------|-------------|-------------------------------------|---------------|---------|----------------|---------|
| <i>PaGTR12</i>               | 2PE GLS            | -           | Two-tailed Student's <i>t</i> -test | $t = -66.217$ | < 0.001 | SigmaPlot 14.0 |         |
|                              | 2Prop GLS          | -           | Two-tailed Student's <i>t</i> -test | $t = -1.118$  | 0.326   | SigmaPlot 14.0 |         |
|                              | 4MSOB<br>GLS       | Square-root | Two-tailed Student's <i>t</i> -test | $t = 3.092$   | 0.037   | SigmaPlot 14.0 |         |
|                              | 4MTB GLS           | -           | Two-tailed Student's <i>t</i> -test | $t = -14.246$ | < 0.001 | SigmaPlot 14.0 |         |
|                              | Benzyl<br>GLS      | -           | Two-tailed Student's <i>t</i> -test | $t = -1.138$  | 0.319   | SigmaPlot 14.0 |         |
| <i>PaGTR13</i>               | 2PE GLS            | -           | Two-tailed Student's <i>t</i> -test | $t = -3.775$  | 0.02    | SigmaPlot 14.0 |         |
|                              | 4MSOB<br>GLS       | -           | Two-tailed Student's <i>t</i> -test | $t = -34.924$ | < 0.001 | SigmaPlot 14.0 |         |
|                              | 4MTB GLS           | -           | Two-tailed Student's <i>t</i> -test | $t = -64.164$ | < 0.001 | SigmaPlot 14.0 |         |
|                              | 4OHB GLS           | -           | Two-tailed Student's <i>t</i> -test | $t = -22.168$ | < 0.001 | SigmaPlot 14.0 |         |
| <i>PaMFS2</i>                | 2PE GLS            | -           | Two-tailed Student's <i>t</i> -test | $t = -29.928$ | < 0.001 | SigmaPlot 14.0 |         |
|                              | Aucubin            | -           | Two-tailed Student's <i>t</i> -test | $t = -26.754$ | < 0.001 | SigmaPlot 14.0 |         |
| <i>PaMFS6</i>                | Catalpol           | Square-root | Two-tailed Student's <i>t</i> -test | $t = -15.421$ | < 0.001 | SigmaPlot 14.0 |         |
|                              | Aucubin            | -           | Two-tailed Student's <i>t</i> -test | $t = -18.699$ | < 0.001 | SigmaPlot 14.0 |         |
| Gene expression level        |                    | -           | Mann-Whitney <i>U</i> test          | $U = 0.000$   | 0.008   | SigmaPlot 14.0 | Fig. 2a |
| I3M GLS                      |                    | -           | Two-tailed Student's <i>t</i> -test | $t = 10.975$  | < 0.001 | SigmaPlot 14.0 | Fig. 2b |
| 1MOI3M GLS                   |                    | -           | Mann-Whitney <i>U</i> test          | $U = 0.000$   | < 0.001 | SigmaPlot 14.0 |         |
| I3M GLS<br><br>1MOI3M<br>GLS | Day 1              | Square-root | Two-tailed Student's <i>t</i> -test | $t = -4.947$  | < 0.001 | SigmaPlot 14.0 | Fig. 2c |
|                              | Day 2              | -           | Generalized least squares           | $LR = 1.689$  | 0.194   | R 3.5.1        |         |
|                              | Day 3              | -           | Two-tailed Student's <i>t</i> -test | $t = -1.585$  | 0.13    | SigmaPlot 14.0 |         |
|                              | Day 4              | -           | Two-tailed Student's <i>t</i> -test | $t = -0.258$  | 0.799   | SigmaPlot 14.0 |         |
|                              | Day 5              | -           | Two-tailed Student's <i>t</i> -test | $t = 0.365$   | 0.72    | SigmaPlot 14.0 |         |
|                              | Day 1 <sup>1</sup> | -           | -                                   | -             | -       | -              |         |
|                              | Day 2              | Square-root | Two-tailed Student's <i>t</i> -test | $t = -0.483$  | 0.635   | SigmaPlot 14.0 |         |
|                              | Day 3              | -           | Two-tailed Student's <i>t</i> -test | $t = -3.204$  | 0.005   | SigmaPlot 14.0 |         |
|                              | Day 4              | -           | Two-tailed Student's <i>t</i> -test | $t = -1.970$  | 0.066   | SigmaPlot 14.0 |         |
|                              | Day 5              | -           | Two-tailed Student's <i>t</i> -test | $t = 0.651$   | 0.524   | SigmaPlot 14.0 |         |

|                                                                                |                   |             |                                     |                |         |                |         |
|--------------------------------------------------------------------------------|-------------------|-------------|-------------------------------------|----------------|---------|----------------|---------|
| 2Prop GLS                                                                      | Log <sub>10</sub> |             | Two-tailed Student's <i>t</i> -test | $t = -28.769$  | < 0.001 | SigmaPlot 14.0 | Fig. 2d |
| 4MSOB GLS                                                                      | Square-root       |             | Two-tailed Student's <i>t</i> -test | $t = -3.630$   | 0.011   |                |         |
| 4MTB GLS                                                                       | Log <sub>10</sub> |             | Two-tailed Student's <i>t</i> -test | $t = -22.118$  | < 0.001 |                |         |
| 4OHB GLS                                                                       | Log <sub>10</sub> |             | Two-tailed Student's <i>t</i> -test | $t = -71.513$  | < 0.001 |                |         |
| Benzyl GLS                                                                     | Log <sub>10</sub> |             | Two-tailed Student's <i>t</i> -test | $t = -66.466$  | < 0.001 |                |         |
| 2PE GLS                                                                        | Square-root       |             | Two-tailed Student's <i>t</i> -test | $t = -47.387$  | < 0.001 |                |         |
| I3M GLS                                                                        | Square-root       |             | Two-tailed Student's <i>t</i> -test | $t = -55.369$  | < 0.001 |                |         |
| Transport activity                                                             | -                 |             | One-way ANOVA                       | $F = 30.803$   | < 0.001 | SigmaPlot 14.0 | Fig. 2e |
| Transport activity                                                             | Square-root       |             | One-way ANOVA                       | $F = 39.664$   | < 0.001 | SigmaPlot 14.0 | Fig. 2f |
| Glucosides in beetles 30 min after the injection vs. after feeding for one day | 2Prop GLS         | -           | Two-tailed Student's <i>t</i> -test | $t = 1.354$    | 0.192   | SigmaPlot 14.0 | -       |
|                                                                                | 4OHB GLS          | -           | Two-tailed Student's <i>t</i> -test | $t = 0.929$    | 0.365   |                |         |
|                                                                                | Salicin           | Square-root | Two-tailed Student's <i>t</i> -test | $t = 7.307$    | < 0.001 |                |         |
|                                                                                | Linamarin         | -           | Mann-Whitney <i>U</i> test          | $U = 0.000$    | < 0.001 |                |         |
|                                                                                | Catalpol          | Square-root | Two-tailed Student's <i>t</i> -test | $t = 3.544$    | 0.002   |                |         |
| Glucosides in beetles                                                          | -                 |             | Generalized least squares           | $LR = 117.719$ | < 0.001 | R 3.5.1        | Fig. 3a |
| Glucosides in feces                                                            | -                 |             | Generalized least squares           | $LR = 52.4334$ | < 0.001 |                |         |
| Bathing saline vs. Malpighian tubules                                          | 2Prop GLS         | -           | Two-tailed Student's <i>t</i> -test | $t = 4.577$    | 0.001   | SigmaPlot 14.0 | Fig. 3b |
|                                                                                | 4MSOB GLS         | -           |                                     | $t = 4.189$    | 0.002   |                |         |
|                                                                                | 4OHB GLS          | -           |                                     | $t = 3.865$    | 0.003   |                |         |
|                                                                                | 2PE GLS           | -           |                                     | $t = 5.858$    | < 0.001 |                |         |
|                                                                                | I3M GLS           | -           |                                     | $t = 3.446$    | 0.006   |                |         |
|                                                                                | Salicin           | -           |                                     | $t = -3.765$   | 0.004   |                |         |
|                                                                                | Linamarin         | -           |                                     | $t = -4.168$   | 0.002   |                |         |
|                                                                                | Catalpol          | -           |                                     | $t = -4.888$   | < 0.001 |                |         |
| Malpighian tubules vs. excretion                                               | 2Prop GLS         | -           |                                     | $t = 5.492$    | < 0.001 |                |         |
|                                                                                | 4MSOB GLS         | -           |                                     | $t = 3.250$    | 0.009   |                |         |

|                |           |                   |                                     |               |         |                |                         |
|----------------|-----------|-------------------|-------------------------------------|---------------|---------|----------------|-------------------------|
| fluid          | 4OHB GLS  | -                 |                                     | $t = 3.741$   | 0.004   |                |                         |
|                | 2PE GLS   | -                 |                                     | $t = 6.026$   | < 0.001 |                |                         |
|                | I3M GLS   | -                 |                                     | $t = 0.585$   | 0.571   |                |                         |
|                | Salicin   | -                 |                                     | $t = -11.754$ | < 0.001 |                |                         |
|                | Linamarin | -                 |                                     | $t = -0.746$  | 0.473   |                |                         |
|                | Catalpol  | -                 |                                     | $t = 3.543$   | 0.005   |                |                         |
| <i>PaGTR5</i>  |           | Log <sub>10</sub> | Two-tailed Student's <i>t</i> -test | $t = 8.711$   | < 0.001 | SigmaPlot 14.0 | Fig. 4a                 |
| <i>PaGTR6</i>  |           | -                 | Two-tailed Student's <i>t</i> -test | $t = 4.371$   | 0.001   | SigmaPlot 14.0 |                         |
| <i>PaGTR7</i>  |           | Square-root       | Two-tailed Student's <i>t</i> -test | $t = 9.197$   | < 0.001 | SigmaPlot 14.0 |                         |
| <i>PaGTR8</i>  |           | -                 | Mann-Whitney <i>U</i> test          | $U = 0.000$   | 0.002   | SigmaPlot 14.0 |                         |
| 2Prop GLS      |           | -                 | Two-tailed Student's <i>t</i> -test | $t = 2.825$   | 0.011   | SigmaPlot 14.0 | Fig. 4b                 |
| 2Prop GLS      | Day 2     | -                 | Mann-Whitney <i>U</i> test          | $U = 39.000$  | 0.427   | SigmaPlot 14.0 | Fig. 4c                 |
|                | Day 3     | Square-root       | Two-tailed Student's <i>t</i> -test | $t = -1.656$  | 0.115   | SigmaPlot 14.0 |                         |
|                | Day 4     | Square-root       | Two-tailed Student's <i>t</i> -test | $t = -2.113$  | 0.049   | SigmaPlot 14.0 |                         |
|                | Day 5     | -                 | Two-tailed Student's <i>t</i> -test | $t = -2.304$  | 0.033   | SigmaPlot 14.0 |                         |
|                | Day 6     | -                 | Two-tailed Student's <i>t</i> -test | $t = -2.933$  | 0.009   | SigmaPlot 14.0 |                         |
| <i>PaGTR2</i>  |           | -                 | Two-tailed Student's <i>t</i> -test | $t = -1.546$  | 0.161   |                | Supplementary Figure 3a |
| <i>PaGTR3</i>  |           | -                 | Mann-Whitney <i>U</i> test          | $U = 11.000$  | 0.841   | SigmaPlot 14.0 |                         |
| <i>PaGTR9</i>  |           | -                 | Two-tailed Student's <i>t</i> -test | $t = 0.910$   | 0.389   |                |                         |
| <i>PaGTR10</i> |           | -                 | Two-tailed Student's <i>t</i> -test | $t = 0.866$   | 0.412   |                |                         |
| Day 1          |           | -                 | Two-tailed Student's <i>t</i> -test | $t = -1.907$  | 0.073   |                | Supplementary Figure 3b |
| Day 2          |           | -                 | Mann-Whitney <i>U</i> test          | $U = 49.000$  | 0.97    |                |                         |
| Day 3          |           | -                 | Two-tailed Student's <i>t</i> -test | $t = -0.779$  | 0.446   | SigmaPlot 14.0 |                         |
| Day 4          |           | -                 | Two-tailed Student's <i>t</i> -test | $t = 0.114$   | 0.91    |                |                         |
| Day 5          |           | -                 | Two-tailed Student's <i>t</i> -test | $t = 1.403$   | 0.178   |                |                         |
| 2Prop GLS      | Day 1     | -                 | Two-tailed Student's <i>t</i> -test | $t = -0.293$  | 0.773   | SigmaPlot 14.0 | Supplementary Figure 4  |
|                | Day 2     | -                 | Two-tailed Student's <i>t</i> -test | $t = 0.517$   | 0.612   | SigmaPlot 14.0 |                         |
|                | Day 3     | -                 | Two-tailed Student's <i>t</i> -test | $t = 0.187$   | 0.854   | SigmaPlot 14.0 |                         |

|            |                    |             |                                     |              |       |                |
|------------|--------------------|-------------|-------------------------------------|--------------|-------|----------------|
| 3MSOP GLS  | Day 4              | Square-root | Two-tailed Student's <i>t</i> -test | $t = 0.897$  | 0.383 | SigmaPlot 14.0 |
|            | Day 5              | -           | Two-tailed Student's <i>t</i> -test | $t = 0.650$  | 0.524 | SigmaPlot 14.0 |
|            | Day 1              | -           | Mann-Whitney <i>U</i> test          | $U = 49.000$ | 0.968 | SigmaPlot 14.0 |
|            | Day 2              | -           | Two-tailed Student's <i>t</i> -test | $t = -0.231$ | 0.82  | SigmaPlot 14.0 |
|            | Day 3              | -           | Two-tailed Student's <i>t</i> -test | $t = 0.922$  | 0.369 | SigmaPlot 14.0 |
| 4MSOB GLS  | Day 4              | Square-root | Two-tailed Student's <i>t</i> -test | $t = -0.256$ | 0.801 | SigmaPlot 14.0 |
|            | Day 5              | -           | Two-tailed Student's <i>t</i> -test | $t = -0.500$ | 0.623 | SigmaPlot 14.0 |
|            | Day 1              | Square-root | Two-tailed Student's <i>t</i> -test | $t = -0.977$ | 0.341 | SigmaPlot 14.0 |
|            | Day 2              | -           | Two-tailed Student's <i>t</i> -test | $t = -1.215$ | 0.24  | SigmaPlot 14.0 |
|            | Day 3              | Square-root | Two-tailed Student's <i>t</i> -test | $t = 0.0495$ | 0.961 | SigmaPlot 14.0 |
| 5MSOP GLS  | Day 4              | Square-root | Two-tailed Student's <i>t</i> -test | $t = 0.276$  | 0.786 | SigmaPlot 14.0 |
|            | Day 5              | -           | Two-tailed Student's <i>t</i> -test | $t = 0.954$  | 0.353 | SigmaPlot 14.0 |
|            | Day 1              | -           | Two-tailed Student's <i>t</i> -test | $t = -1.253$ | 0.226 | SigmaPlot 14.0 |
|            | Day 2              | -           | Two-tailed Student's <i>t</i> -test | $t = -0.461$ | 0.65  | SigmaPlot 14.0 |
|            | Day 3              | -           | Two-tailed Student's <i>t</i> -test | $t = -0.105$ | 0.918 | SigmaPlot 14.0 |
| 7MSOH GLS  | Day 4              | -           | Two-tailed Student's <i>t</i> -test | $t = 0.580$  | 0.57  | SigmaPlot 14.0 |
|            | Day 5              | -           | Two-tailed Student's <i>t</i> -test | $t = 1.112$  | 0.281 | SigmaPlot 14.0 |
|            | Day 1 <sup>1</sup> | -           | -                                   | -            | -     | -              |
|            | Day 2              | -           | Mann-Whitney <i>U</i> test          | $U = 47.000$ | 0.845 | SigmaPlot 14.0 |
|            | Day 3              | -           | Two-tailed Student's <i>t</i> -test | $t = -0.176$ | 0.863 | SigmaPlot 14.0 |
| 8MSOO GLS  | Day 4              | -           | Mann-Whitney <i>U</i> test          | $U = 37.500$ | 0.825 | SigmaPlot 14.0 |
|            | Day 5              | -           | Mann-Whitney <i>U</i> test          | $U = 44.000$ | 0.675 | SigmaPlot 14.0 |
|            | Day 1 <sup>1</sup> | -           | -                                   | -            | -     | -              |
|            | Day 2              | -           | Mann-Whitney <i>U</i> test          | $U = 43.000$ | 0.564 | SigmaPlot 14.0 |
|            | Day 3              | -           | Mann-Whitney <i>U</i> test          | $U = 44.000$ | 0.671 | SigmaPlot 14.0 |
| 4MOI3M GLS | Day 4              | -           | Mann-Whitney <i>U</i> test          | $U = 34.000$ | 0.595 | SigmaPlot 14.0 |
|            | Day 5              | -           | Mann-Whitney <i>U</i> test          | $U = 37.500$ | 0.358 | SigmaPlot 14.0 |
|            | Day 1              | -           | Two-tailed Student's <i>t</i> -test | $t = -2.550$ | 0.02  | SigmaPlot 14.0 |
|            | Day 2              | -           | Two-tailed Student's <i>t</i> -test | $t = 1.496$  | 0.152 | SigmaPlot 14.0 |

|                |                    |             |                                     |               |       |                |                         |
|----------------|--------------------|-------------|-------------------------------------|---------------|-------|----------------|-------------------------|
|                | Day 3              | -           | Two-tailed Student's <i>t</i> -test | $t = -0.217$  | 0.831 | SigmaPlot 14.0 |                         |
|                | Day 4              | -           | Two-tailed Student's <i>t</i> -test | $t = -0.190$  | 0.851 | SigmaPlot 14.0 |                         |
|                | Day 5              | -           | Two-tailed Student's <i>t</i> -test | $t = 1.433$   | 0.169 | SigmaPlot 14.0 |                         |
| <i>PaGTR9</i>  |                    | -           | Two-tailed Student's <i>t</i> -test | $t = 1.403$   | 0.191 | SigmaPlot 14.0 | Supplementary Figure 7a |
| <i>PaGTR10</i> |                    | -           | Two-tailed Student's <i>t</i> -test | $t = -0.0736$ | 0.943 | SigmaPlot 14.0 |                         |
| Day 2          |                    | -           | Two-tailed Student's <i>t</i> -test | $t = 1.367$   | 0.188 |                | Supplementary Figure 7b |
| Day 3          | Square-root        | -           | Two-tailed Student's <i>t</i> -test | $t = -1.044$  | 0.310 |                |                         |
| Day 4          | -                  | -           | Two-tailed Student's <i>t</i> -test | $t = -1.555$  | 0.137 | SigmaPlot 14.0 |                         |
| Day 5          | -                  | -           | Two-tailed Student's <i>t</i> -test | $t = 0.181$   | 0.859 |                |                         |
| Day 6          | -                  | -           | Two-tailed Student's <i>t</i> -test | $t = 0.214$   | 0.833 |                |                         |
| 3MSOP GLS      | Day 2 <sup>1</sup> | -           | -                                   | -             | -     | -              |                         |
|                | Day 3              | -           | Two-tailed Student's <i>t</i> -test | $t = -1.987$  | 0.062 | SigmaPlot 14.0 |                         |
|                | Day 4              | -           | Two-tailed Student's <i>t</i> -test | $t = -0.675$  | 0.509 | SigmaPlot 14.0 |                         |
|                | Day 5              | -           | Two-tailed Student's <i>t</i> -test | $t = 0.762$   | 0.456 | SigmaPlot 14.0 |                         |
|                | Day 6              | -           | Two-tailed Student's <i>t</i> -test | $t = 0.894$   | 0.383 | SigmaPlot 14.0 |                         |
| 4MSOB GLS      | Day 2              | -           | Mann-Whitney <i>U</i> test          | $U = 39.000$  | 0.427 | SigmaPlot 14.0 |                         |
|                | Day 3              | -           | Mann-Whitney <i>U</i> test          | $U = 39.000$  | 0.427 | SigmaPlot 14.0 |                         |
|                | Day 4              | Square-root | Two-tailed Student's <i>t</i> -test | $t = -0.261$  | 0.797 | SigmaPlot 14.0 |                         |
|                | Day 5              | Square-root | Two-tailed Student's <i>t</i> -test | $t = 0.808$   | 0.430 | SigmaPlot 14.0 |                         |
|                | Day 6              | -           | Two-tailed Student's <i>t</i> -test | $t = 1.619$   | 0.123 | SigmaPlot 14.0 |                         |
| 5MSOP GLS      | Day 2 <sup>1</sup> | -           | -                                   | -             | -     | -              |                         |
|                | Day 3 <sup>1</sup> | -           | -                                   | -             | -     | -              |                         |
|                | Day 4 <sup>1</sup> | -           | -                                   | -             | -     | -              |                         |
|                | Day 5              | -           | Mann-Whitney <i>U</i> test          | $U = 28.500$  | 0.090 | SigmaPlot 14.0 |                         |
|                | Day 6              | -           | Two-tailed Student's <i>t</i> -test | $t = 1.505$   | 0.150 | SigmaPlot 14.0 |                         |
| 7MSOH GLS      | Day 2 <sup>1</sup> | -           | -                                   | -             | -     | -              |                         |
|                | Day 3 <sup>1</sup> | -           | -                                   | -             | -     | -              |                         |



|                                                |                    |                                     |                                     |                    |                |                            |  |
|------------------------------------------------|--------------------|-------------------------------------|-------------------------------------|--------------------|----------------|----------------------------|--|
| 8MSOO<br>GLS                                   | Day 4 <sup>1</sup> | -                                   | -                                   | -                  | -              | -                          |  |
|                                                | Day 5 <sup>1</sup> | -                                   | -                                   | -                  | -              | -                          |  |
|                                                | Day 6 <sup>1</sup> | -                                   | -                                   | -                  | -              | -                          |  |
|                                                | Day 2 <sup>1</sup> | -                                   | -                                   | -                  | -              | -                          |  |
|                                                | Day 3 <sup>1</sup> | -                                   | -                                   | -                  | -              | -                          |  |
|                                                | Day 4 <sup>1</sup> | -                                   | -                                   | -                  | -              | -                          |  |
| I3M GLS                                        | Day 5 <sup>1</sup> | -                                   | -                                   | -                  | -              | -                          |  |
|                                                | Day 6 <sup>1</sup> | -                                   | -                                   | -                  | -              | -                          |  |
|                                                | Day 2 <sup>1</sup> | -                                   | -                                   | -                  | -              | -                          |  |
|                                                | Day 3              | -                                   | Mann-Whitney <i>U</i> test          | <i>U</i> = 24.000  | 0.043          | SigmaPlot 14.0             |  |
|                                                | Day 4              | -                                   | Mann-Whitney <i>U</i> test          | <i>U</i> = 33.000  | 0.211          | SigmaPlot 14.0             |  |
|                                                | Day 5              | -                                   | Two-tailed Student's <i>t</i> -test | <i>t</i> = 3.170   | 0.005          | SigmaPlot 14.0             |  |
| 4MOI3M<br>GLS                                  | Day 6              | -                                   | Two-tailed Student's <i>t</i> -test | <i>t</i> = 2.440   | 0.025          | SigmaPlot 14.0             |  |
|                                                | Day 2              | -                                   | Two-tailed Student's <i>t</i> -test | <i>t</i> = 2.304   | 0.033          | SigmaPlot 14.0             |  |
|                                                | Day 3              | -                                   | Two-tailed Student's <i>t</i> -test | <i>t</i> = 0.149   | 0.883          | SigmaPlot 14.0             |  |
|                                                | Day 4              | -                                   | Two-tailed Student's <i>t</i> -test | <i>t</i> = -2.835  | 0.011          | SigmaPlot 14.0             |  |
|                                                | Day 5              | -                                   | Two-tailed Student's <i>t</i> -test | <i>t</i> = 3.252   | 0.004          | SigmaPlot 14.0             |  |
|                                                | Day 6              | -                                   | Two-tailed Student's <i>t</i> -test | <i>t</i> = -0.0386 | 0.970          | SigmaPlot 14.0             |  |
| <i>PaGTR2</i>                                  | Square-root        | Two-tailed Student's <i>t</i> -test | <i>t</i> = 9.832                    | < 0.001            | SigmaPlot 14.0 | Supplementary<br>Figure 9a |  |
| <i>PaGTR3</i>                                  | Log <sub>10</sub>  | Two-tailed Student's <i>t</i> -test | <i>t</i> = 5.679                    | < 0.001            | SigmaPlot 14.0 |                            |  |
| Accumulation of the<br>ingested glucosinolates | -                  | Two-tailed Student's <i>t</i> -test | <i>t</i> = -1.365                   | 0.185              | SigmaPlot 14.0 | Supplementary<br>Figure 9b |  |

120 <sup>1</sup>Statistical analysis was not conducted if glucosinolate was only detected in one or two replicates.
